# Supplementary material
Source: PubMed Central journal article supplement (PMC7082769)
Supplement: jamaoncol-e200197-s001.pdf [file jamaoncol-e200197-s001.pdf]

## Supplementary Online Content

Mirabello L, Zhu B, Koster R, et al. Frequency of pathogenic germline variants in cancer-susceptibility genes in patients with osteosarcoma. *JAMA Oncol*. Published March 19, 2020. doi:10.1001/jamaoncol.2020.0197

**eMethods.** Study Population, Whole-Exome Sequencing, Pathogenicity Scoring and In Silico Analysis, and Statistical Analyses

**eTable 1.** Description of Participating Studies

**eTable 2.** Description of 238 Cancer-Susceptibility Genes Evaluated

**eTable 3.** Osteosarcoma Candidate Genes and Known Pediatric/Osteosarcoma Somatically Altered Genes Evaluated

**eTable 4.** Details of Criteria for Classification of Pathogenicity Categories

**eTable 5.** Details of Pathogenic and Likely Pathogenic Variants in 1004 Patients With Osteosarcoma in Discovery Set

**eTable 6.** Prevalence of Potentially Pathogenic Variants in 238 Cancer-Susceptibility Genes in 1244 Patients With Osteosarcoma Compared With 28 235 Individuals Without Cancer

**eTable 7.** Top Statistically Significant Cancer-Susceptibility Genes With a Higher Burden of Variants

**eTable 8.** Characteristics of Individuals With *TP53* Pathogenic/Likely Pathogenic Variants and All Pathogenic/Likely Pathogenic Cancer-Susceptibility Gene Variants in 1004 Patients With Osteosarcoma in the Discovery Set

**eTable 9.** Pathways Significantly Enriched for 101 Cancer-Susceptibility Genes With 1 or More Pathogenic/Likely Pathogenic Variants in 1004 Patients With Osteosarcoma

**eTable 10.** Number of Rare Variants by Pathogenicity Score in 1004 Patients With Osteosarcoma and 1062 Individuals Without Cancer for 238 Cancer-Susceptibility Genes and Pathogenic/Likely Pathogenic Variants in 240 Patients in the Replication Set

**eTable 11.** Predicted Pathogenic and Likely Pathogenic Variants in 240 Patients in the Replication Set

**eTable 12.** Top Statistically Significant Candidate Genes With a Higher Burden of Variants

**eFigure 1.** Mean Whole-Exome Sequencing Coverage per Sample

**eFigure 2.** Frequency of Rare Pathogenic/Likely Pathogenic Variants in the *TP53* Gene and the Other Cancer-Susceptibility Genes

**eFigure 3.** Pathway Enrichment Illustrated With a Network Analysis and Protein-Protein Interactions for 101 Cancer-Susceptibility Genes With 1 or More Pathogenic/Likely Pathogenic Variant Identified in Discovery Set of 1004 Patients With Osteosarcoma

**eFigure 4.** Lollipop Plots Illustrating Location of Variants Within the Specified Genes That Contain a Significantly Increased Burden (Number) of Rare Pathogenic/Likely Pathogenic Variants in Patients Compared With the Control Group by Protein/Functional Domain

#### **eReferences**

This supplementary material has been provided by the authors to give readers additional information about their work.

**eMethods.** Study Population, Whole-Exome Sequencing, Pathogenicity Scoring and In Silico Analysis, and Statistical Analyses

### ***Study Population***

**Osteosarcoma patients.** 1,244 cases were assembled from participating studies described in **Supplemental Table 1**. 782 osteosarcoma cases were previously reported in a genome-wide association study (GWAS)<sup>1,2</sup>, including 48 cases from the Instituto de Oncologia Pediátrica GRAACC/UNIFESP and Universidade Federal de Sao Paulo, Brazil<sup>2</sup>, and a total of 462 additional cases were included, drawn from the Childhood Cancer Survivor Study (CCSS)<sup>3</sup>, USA, the NCI Bone Disease and Injury Study of Osteosarcoma (BDISO)<sup>4</sup>, USA, the Hospital Infantil Manuel De Jesus Rivera, Nicaragua, and from the Unidad Nacional de Oncologia Pediatrica (UNOP), Guatemala<sup>5</sup>. 1,004 osteosarcoma cases with WES performed at the NCI were included as a primary discovery set, and 240 additional (non-overlapping) osteosarcoma cases<sup>6</sup> for replication had WES (N=100) or targeted sequencing (N=140) performed at the University of Minnesota. Neither family history nor tumor sequence data were available. 360 cases in the current study were also included in our prior study of *TP53* targeted sequencing and evaluation of P/LP variants<sup>7</sup>; this is noted in the results.

**Population controls.** 1,062 in-house, cancer-free adult controls were assembled from participating studies in **Supplemental Table 1**. 994 European DCEG control subjects were adults (mean age at study enrollment: 64.6, SD 7.2) drawn from three large studies: the Prostate, Lung, Colon and Ovarian Cancer Prevention Trial (PLCO)<sup>8</sup>, the American Cancer Society Cancer Prevention Study-II (CPSII)<sup>9</sup>, and the Environment and Genes in Lung cancer Etiology (EAGLE) study<sup>10</sup>. Additionally, 68 controls from the Instituto de Oncologia Pediátrica GRAACC/UNIFESP and Universidade Federal de Sao Paulo, Brazil drawn from the same Brazilian population as the 48 osteosarcoma cases from Brazil.

The in-house, cancer-free adult controls and the discovery set cases had comparable whole-exome sequencing methods, coverage, variant calling, quality control filtering, and ancestry assessment. SNP GWAS microarray or WES data was used to determine the underlying population substructure of the cases and controls based on STRUCTURE and principal components analyses (PCA) with outliers removed. Individuals with >80% European ancestry were considered European (EUR).

All participating subjects provided informed consent under the auspices of local Institutional Review Boards.

### ***Whole-Exome Sequencing***

WES was performed on a discovery set of 1,004 confirmed osteosarcoma cases and 1,062 DCEG controls on germline DNA extracted from either leukocytes or buccal samples. WES detailed methods have been previously described.<sup>11-13</sup> In brief, NimbleGen's SeqCap EZ Human Exome Library, Exome+UTR (Roche NimbleGen, Inc., Madison, WI, USA), capture kit was used for all cases and controls, and sequencing was performed on an Illumina HiSeq2500 (with 125bp paired end reads) with the Bioo Nextflex (Perkin Elmer, Inc., Austin, TX) library prep (all DCEG controls and 721 cases) or on an Illumina HiSeq4000 (with 150bp paired end reads) with Kapa

HyperPlus (Roche Sequencing and Life Science, Kapa Biosystems, Wilmington, MA) library prep (285 cases). For all samples, library fragmentation was performed with parameters optimized to obtain insert sizes of 250bp-350bp. The human reference genome and the “known gene” transcript annotation were downloaded from the UCSC database, version hg19. Reads were trimmed and aligned to the hg19 reference genome using the Novoalign software (v3.00.05). High-quality alignments for each individual were created, local realignments refined, and BAM file level recalibrations were done with modules from the Genome Analysis Toolkit (GATK v3.1)<sup>14</sup>.

Variant discovery and genotype calling of multi-allelic substitutions, insertions and deletions were performed on all individuals using the UnifiedGenotyper and HaplotypeCaller modules from Genome Analysis Toolkit (GATK v3.1) as well as the FreeBayes variant caller (v9.9.2). The Ensembl variant calling pipeline (bcbio V0.2.2:

<https://github.com/chapmanb/bcbio.variation/releases/tag/v0.2.2>) was used to integrate variant calling results from the above three callers, and all variants were included in the analyses after the Ensembl calling. Insertions and deletions were left-aligned at both post-alignment (BAM) and post-variant-calling (VCF) levels using GATK’s LeftAlignIndels and LeftAlignVariants modules, respectively. Annotation and variant dissemination was performed using an in-house custom software annotation pipeline.

Exome analyses were conducted on samples that passed established in house quality control and variant filters<sup>11,12,15</sup>. Poor quality and contaminated samples were excluded, and variants were excluded if they did not pass our pipeline quality control metrics (*e.g.*, CScorefilter), had read depth of <5, heterozygous allele fraction <0.25, and if the minor allele frequency (MAF) was >1% in our population (cases and controls combined) or in any population within 1,000 Genomes Project<sup>16</sup>, NHLBI ESP<sup>17</sup> or ExAC<sup>18</sup>.

The average WES coverage was >15 reads in 99.8% of the cases and 99.7% of the controls, with median coverage of 53X and 52X in cases and controls, respectively (**Supplemental Figure 1**).

**WES and targeted sequencing of 240 replication set cases.** WES of 100 osteosarcoma cases (replication set 1) and targeted sequencing of the 238 cancer-susceptibility genes for 140 additional osteosarcoma cases (replication set 2) was conducted on germline DNA extracted from buccal samples by standard methods at the University of Minnesota. WES Libraries were created using the Agilent SureSelect All Exon V5+UTRs kit and were sequenced by the University of Minnesota Genomics Center (UMGC) using a HiSeq2000 that generated 100bp paired end reads with an average on-target insert size of 188.7bp. We implemented the best practices as delineated in the Genome Analysis Toolkit (GATK) pipeline<sup>19</sup>, including using BWA-MEM<sup>20</sup> for alignment, GATK for quality recalibration and indel realignment, and GATK HaplotypeCaller for genotyping. On average, 48.3 million reads were delivered per sample, with 35.0 million on target. The average read depth was 46.7x across the 100 case samples.

Genes for targeted sequencing were selected based on genes identified in the 100 osteosarcoma cases (noted above, replication set 1) with a P/LP variant, plus genes identified as cancer-predisposing genes based on previous reports<sup>21,22</sup> and genes reported in COSMIC<sup>23</sup> with germline effects; the 238 cancer-susceptibility genes assessed in the discovery set were targeted. Targeted sequencing was conducted at UMGc using a HiSeq2500 that generated 125bp paired

end reads with an average on-target insert size of 195.4bp. Best practices were implemented as delineated in the GATK pipeline<sup>19,20</sup>. On average, 6.8 million reads were delivered per sample, with 4.4 million on target. The average read depth was 206.6x across 140 case samples.

### ***Pathogenicity Scoring and In Silico Analysis***

Rare variants passing quality control and variant filters were evaluated for pathogenicity. A step-wise pipeline was constructed to evaluate each rare variant identified above in the genes of interest. Variants were classified as “Pathogenic” (P), “Likely Pathogenic” (LP), “Variant of Uncertain Significance” (VUS), “Likely Benign” (LB), or “Benign”. The classification of variants was based on previous reports<sup>22,24</sup> and on the guidelines recommended by the American College of Medical Genetics and Genomics and the Association for Molecular Pathology<sup>25</sup> and adapted as follows: Step 1: variants matching a known variant annotated by a badged laboratory in ClinVar<sup>26</sup> were categorized as the designated pathogenicity category given by the badged ClinVar laboratory (P, LP, VUS, LB or B). The ClinVar badged laboratory classification was based on clinical laboratories meeting minimum requirements for data sharing to support quality assurance by ClinGen (<https://www.clinicalgenome.org/lablist/>); the variant scores from laboratories that were not-badged were disregarded using the archive database downloaded on 5/20/2018<sup>26</sup>. At least one score was needed to classify variants, and a majority rule was applied. Step 2: variants not included in ClinVar were evaluated using InterVar version 2.1.2 (default settings)<sup>27</sup>, and categorized by its designated pathogenicity category (P, LP, VUS, LB or B). Step 3: variants of uncertain significance, as determined by either ClinVar or InterVar, that were a high impact variant (frameshift indels, stop gain/loss, or known splice sites) and classified as a disease-causing mutation (DM) by HGMD<sup>28</sup> (2018.1) were categorized as LP. Variants classified as a high impact variant or HGMD DM in established cancer predisposition syndrome genes<sup>29</sup> were manually reviewed based on the published literature to determine/confirm pathogenicity and categorized as LP or VUS. Step 4: all P and LP variants were further filtered by population frequency (public database populations<sup>16-18</sup> and our total case/control frequency), for AR genes the variant allele frequency had to be  $\leq 0.005$  and  $\leq 0.001$  for non-AR genes otherwise the variants were down-graded to VUS. The VUS category was further divided into *in silico* predicted damaging (VUS\_D) or not-damaging (VUS\_ND), described below (see *in silico* prediction algorithm). The final step was a manual review of all P and LP designated variants, and review of the high impact and HGMD DM variants for a final designation of P, LP, or VUS\_D. Manual review included review of literature for confirmation of pathogenicity, gene specific database review, confirmation of the phenotype within the spectrum of the associated syndrome or cancer, evaluation of the mutation impact on gene function and the mechanism of action associated with that gene. **Supplemental Table 4** summarizes the cancer-susceptibility gene variant classification schema.

Detailed manual review of the P/LP variants, high impact and HGMD DM variants, as described, was performed for the 1,004 discovery set cases and 1,062 DCEG controls. For both the 240 replication set cases and the 27,173 ExAC NFE resource, Steps 1-4 were identical with an equivalent minimal manual review at the final step of the classification schema (**Supplemental Table 4**). It is not possible to determine whether individuals in ExAC carry more than one variant of interest due to the lack of individual level data. This could result in an overestimation of MAFs in this dataset.

An *in silico* prediction algorithm was used to further filter the VUS category for all of the cancer-susceptibility genes, and for the candidate genes, in order to categorize VUS variants as ‘damaging’ or ‘not damaging’. Three programs were used to assign variants as *in silico* deleterious: if MetaSVM<sup>30</sup> (predicted Damaging), REVEL<sup>31</sup> (score  $\geq 0.5$ ) and CADD<sup>32</sup> (score  $\geq 20$ ) predicted a variant deleterious, the variant was categorized as “VUS\_D”, or otherwise as “VUS\_ND”. For candidate and somatic genes, variants were further classified as ‘VUS\_D’ if they were a high impact variant (frameshift indels, stop gain/loss, or known splice sites) or pathogenic or likely pathogenic (P/LP) by ClinVar<sup>26</sup>. The variant population frequency for VUS\_D variants had to be  $\leq 0.005$  in public database populations<sup>16-18</sup> and in our total population (cases and controls), otherwise variants were down-graded to VUS\_ND.

Variant calls for all P/LP indels and approximately 50% of SNVs were manually reviewed by an experienced reviewer, and 3.6% of the indels were excluded due to potentially being a false positive based on the following criteria. The sequencing reads (BAM files) in the genomic regions surrounding the variant calls were reviewed using the Integrative Genomics Viewer (IGV) to exclude sequencing and analysis artifacts, and thus false positive findings, following the recommendations/criteria outlined in Robinson et al. 2017<sup>33</sup> and in the IGV user guide (<http://www.broadinstitute.org/igv>). Briefly, visual inspection for potential errors in indel or SNV calls was performed by manually reviewing the specific indel/variant aligned reads for: (1) highlighted mismatched bases in individual reads; (2) highlighted ambiguously mapped reads (mapping quality = 0); (3) shaded bases with low read base quality (shaded when quality  $\leq 20$ ); (4) forward and reverse strands for strand bias; and (5) the alignment, sequencing, and platform meta-data.

### ***Statistical Analyses***

We compared the 1,004 osteosarcoma cases (discovery set) with the 1,062 DCEG controls (994 controls of EUR ancestry and 67 controls drawn from the same Brazilian population as the studied included 48 osteosarcoma cases from Brazil). For replication, we evaluated 240 osteosarcoma cases with germline WES (replication set 1) or targeted sequencing (replication set 2) data from the University of Minnesota, and we compared the total of the cases to the public resource of ExAC NFE<sup>18</sup>.

Rare variant burden tests were conducted between the EUR cases (N=732) and EUR DCEG controls (N=994) using the burden and SKAT-O tests<sup>34</sup>. To adjust for multiple comparisons, a Bonferroni significance threshold of 0.0002 was used for 238 cancer-susceptibility gene tests, and *P*-values that remained significant based on this threshold were noted. Burden tests were performed in three ways: (1) comparing the burden of only the P/LP cancer-susceptibility gene variants (termed “pathogenic variant burden”), (2) comparing the burden of all potentially deleterious variants (including P, LP and VUS\_D variants and termed “deleterious variant burden”), (3) comparing the burden of all rare variants, applying a MAF threshold of 0.01 as the definition of rare variation (no pathogenicity criteria, termed “rare variant burden”).

Comparisons among cases with and without P/LP cancer-susceptibility gene variants were performed using Chi-squared ( $\chi^2$ ) or Fisher’s exact tests for categorical variables, and Mann-Whitney U (MWU) tests for continuous variables (i.e., age). A subregion-based burden test (REBET)<sup>35</sup> was used to determine the *TP53* protein/functional domain that was significantly

enriched for P/LP variants in the cases compared to the controls, while adjusting for multiple comparisons. Lollipop plots of P/LP variants by gene with publicly available somatic mutation pediatric data were visualized in the ProteinPaint genome browser<sup>36</sup>.

The ExAC NFE case-control comparisons were only performed for the genes that were identified as significantly different between the primary discovery set cases and DCEG controls that had comparable WES at NCI. Carrier frequencies from ExAC NFE were only used as secondary comparisons because the methods are not directly comparable to our cases due to potential differences in both the sequencing methods (e.g., capture kit, sequencing chemistries) and bioinformatic analyses (e.g., variants in ExAC were only called using HaplotypeCaller and utilized different quality control filters). Exact binomial tests were used to compare the frequencies of variants in select cancer-susceptibility genes in the cases versus those in the ExAC NFE resource; burden tests could not be performed for ExAC comparisons because ExAC does not provide individual level data. We used logistic regression to assess associations between case-control status and the presence of P/LP cancer-susceptibility gene variants. All statistical tests were two-sided and performed with R version 3.3.2 and SPSS version 23.

We conducted a time-to-event analysis in 407 osteosarcoma cases from the discovery set with survival data to investigate the effect of carrying P/LP variants on overall survival. The overall survival time was calculated as the time from the date of osteosarcoma diagnosis until the date of death for those deceased or the last date known to be alive; patients were censored at the last date known to be alive or when lost to follow-up. Cause of death was not available for all cases. We compared overall survival for cases carrying P/LP variants to cases without P/LP variants for all cancer-susceptibility genes, and for *TP53*, using Cox proportional hazards regression and estimated hazard ratios (HR) and 95% confidence intervals (CI). Cox models were adjusted for age at diagnosis, gender, and tumor location (i.e., axial vs. extremity location).

We conducted a pathway enrichment analysis for the 101 cancer-susceptibility genes with one or more pathogenic or likely pathogenic variant identified in the discovery set of 1,004 osteosarcoma cases using algorithms from the webtools KOBAS 3.0<sup>37</sup> (<http://kobas.cbi.pku.edu.cn>) and PathDIP<sup>38</sup> (<http://ophid.utoronto.ca/pathDIP/>). Both algorithms used a hypergeometric approach to test pathways that are over represented given a gene set. For this analysis we used: (1) as input, all genes that have at least one P/LP variant in the cases; (2) as background, *Homo sapien* genes provided by each algorithm; and, (3) as pathway databases, KEGG and Reactome. For the network analysis, protein-protein interactions were retrieved from the Integrated Interactions Database (IID)<sup>39</sup> and visualized in Network Analysis, Visualization, & Graphing TORonto (Navigator)<sup>40</sup>.

**eTable 1.** Description of Participating Studies

| Study Name                                                                                                 | Country of Origin | EUR <sup>†</sup> | AFR <sup>†</sup> | ADM <sup>†</sup> | ASN <sup>†</sup> | HIS <sup>†</sup> | Brazil | Total | Age at dx, Mean (SD) | N Male, % |       |
|------------------------------------------------------------------------------------------------------------|-------------------|------------------|------------------|------------------|------------------|------------------|--------|-------|----------------------|-----------|-------|
| <b>Cases, discovery set</b>                                                                                |                   |                  |                  |                  |                  |                  |        |       |                      |           |       |
| NCI Retrospective Study of Genetic Risk Factors for Osteosarcoma, Children's Oncology Group (COG AOST08B1) | USA               | 182              | 50               | 33               | 0                | 40               | 0      | 305   | 13.2 (3.6)           | 166       | 54.4% |
| Clínica Universidad de Navarra, Pamplona                                                                   | Spain             | 73               | 0                | 1                | 0                | 0                | 0      | 74    | 14.8 (5.5)           | 40        | 54.1% |
| Royal National Orthopaedic Hospital NHS Trust and University College London Cancer Institute               | UK                | 46               | 1                | 5                | 1                | 0                | 0      | 53    | 25.2 (17.8)          | 34        | 64.2% |
| Istituto Ortopedico Rizzoli                                                                                | Italy             | 40               | 0                | 0                | 0                | 0                | 0      | 40    | 23.2 (14.6)          | 27        | 67.5% |
| Ankara Oncology and Education Research Hospital                                                            | Turkey            | 0                | 0                | 22               | 0                | 0                | 0      | 22    | 11.2 (4.1)           | 11        | 50.0% |
| Instituto de Oncologia Pediátrica GRAACC/UNIFESP and Universidade Federal de Sao Paulo                     | Brazil            | 0                | 0                | 0                | 0                | 0                | 48     | 48    | 18.1 (5.3)           | 31        | 64.6% |
| Childhood Cancer Survivor Study (CCSS)                                                                     | USA               | 284              | 0                | 0                | 0                | 0                | 0      | 284   | 14.5 (3.4)           | 145       | 51.4% |
| NCI Bone Disease and Injury Study of Osteosarcoma (BDISO)                                                  | USA               | 107              | 3                | 12               | 2                | 0                | 0      | 124   | 25.8 (16.0)          | 70        | 56.5% |
| Unidad Nacional de Oncologia Pediatrica (UNOP)                                                             | Guatemala         | 0                | 0                | 0                | 0                | 54               | 0      | 54    | 12.9 (3.8)           | 16        | 29.6% |



|                                                                                        |        |            |           |           |          |            |           |             |                   |            |              |
|----------------------------------------------------------------------------------------|--------|------------|-----------|-----------|----------|------------|-----------|-------------|-------------------|------------|--------------|
| Total                                                                                  |        | 732        | 54        | 73        | 3        | 94         | 48        | 1004        | 16.5 (9.5)        | 540        | 53.9%        |
| <b>Cases, replication 1: WES data from University of Minnesota</b>                     |        |            |           |           |          |            |           |             |                   |            |              |
| Genetic Epidemiology of Osteosarcoma study, Children's Oncology Group (COG AEPI05N2)   | USA    | 87         | 3         | 2         | 1        | 7          | 0         | 100         | 13.2 (3.3)        | 57         | 57.0%        |
| <b>Cases, replication 2: Targeted sequencing from University of Minnesota</b>          |        |            |           |           |          |            |           |             |                   |            |              |
| Genetic Epidemiology of Osteosarcoma study, Children's Oncology Group (COG AEPI05N2)   | USA    | 124        | 5         | 3         | 0        | 8          | 0         | 140         | 14.1 (2.9)        | 79         | 56.4%        |
| <b>Total Cases</b>                                                                     |        | <b>943</b> | <b>62</b> | <b>78</b> | <b>4</b> | <b>109</b> | <b>48</b> | <b>1244</b> | <b>16 (8.9)</b>   | <b>684</b> | <b>55.0%</b> |
| <b>Controls</b>                                                                        |        |            |           |           |          |            |           |             |                   |            |              |
| Prostate, Lung, Colon and Ovarian Cancer Prevention Trial (PLCO)                       | USA    | 375        | 0         | 0         | 0        | 0          | 0         | 375         | 63.8 (5.7)        | 218        | 58%          |
| American Cancer Society Cancer Prevention Study-II (CPSII)                             | USA    | 223        | 0         | 0         | 0        | 0          | 0         | 223         | 62.8 (6.1)        | 108        | 48%          |
| Environment And Genes in Lung cancer Etiology (EAGLE)                                  | Italy  | 396        | 0         | 0         | 0        | 0          | 0         | 396         | 66.3 (8.5)        | 317        | 80%          |
| Instituto de Oncologia Pediátrica GRAACC/UNIFESP and Universidade Federal de Sao Paulo | Brazil | 0          | 0         | 0         | 0        | 0          | 68        | 68          | —                 | 37         | 54%          |
| <b>Total DCEG Controls</b>                                                             |        | <b>994</b> | <b>0</b>  | <b>0</b>  | <b>0</b> | <b>0</b>   | <b>68</b> | <b>1062</b> | <b>64.6 (7.2)</b> | <b>680</b> | <b>64%</b>   |

†Ancestry based on GWAS data; EUR, European ancestry; AFR, African ancestry; ADM, admixed ancestry; ASN, Asian ancestry; HIS, Hispanic ancestry; Brazil, cases/controls from Brazil.

Age data was not available for the cancer-free controls from Brazil.

**eTable 2.** Description of 238 Cancer-Susceptibility Genes Evaluated

Syndromes known to be associated with the occurrence of osteosarcoma are shaded.

| Gene            | Cancer syndrome(s)                                     | Major associated tumor type(s)                                                                                                 | Mode of inheritance | Mechanism of action |
|-----------------|--------------------------------------------------------|--------------------------------------------------------------------------------------------------------------------------------|---------------------|---------------------|
| <i>ABCB11</i>   | Progressive familial intrahepatic cholestasis          | Hepatocellular carcinoma, Cholangiocarcinoma                                                                                   | AR                  | loss-of-function    |
| <i>ACD</i>      | Dyskeratosis congenita                                 | MDS, AML, head/neck squamous cell cancer, anogenital adenocarcinoma                                                            | AD/AR               | loss-of-function    |
| <i>AGL</i>      | Glycogen storage disease type III                      | hepatocellular carcinoma                                                                                                       | AR                  | loss-of-function    |
| <i>AIP</i>      | Familial isolated pituitary adenoma                    | Pituitary adenoma                                                                                                              | AD                  | loss-of-function    |
| <i>ALK</i>      |                                                        | Neuroblastoma                                                                                                                  | AD                  | gain-of-function    |
| <i>ANKRD26</i>  | Thrombocytopenia 2                                     | MDS                                                                                                                            | AD                  |                     |
| <i>APC</i>      | Familial adenomatous polyposis (FAP)                   | Colorectal cancer, Hepatoblastoma, Desmoid tumor                                                                               | AD                  | loss-of-function    |
| <i>APOBEC3B</i> |                                                        | Breast Cancer                                                                                                                  | AR                  |                     |
| <i>AR</i>       | Reifenstein syndrome; Androgen insensitivity syndrome  | prostate                                                                                                                       | X-linked, recessive | gain-of-function    |
| <i>ASXL1</i>    | Bohring-Opiz Syndrome (germline)                       | blood-forming cells (leukemias), such as acute myeloid leukemia, chronic myelomonocytic leukemia, and myelodysplastic syndrome | unk or de novo      | gain-of-function    |
| <i>ATG2B</i>    |                                                        | MDS                                                                                                                            | AD                  | gain-of-function    |
| <i>ATM</i>      | Ataxia-Telangiectasia (biallelic mutations)            | Biallelic mutations: Lymphoid hematological malignancy (leukemia, lymphoma). Monoallelic mutations: Breast cancer.             | AD/AR               | loss-of-function    |
| <i>ATR</i>      | Cutaneous telangiectasia and cancer syndrome, familial | oropharyngeal cancer                                                                                                           | AD                  | loss-of-function    |
| <i>AXIN2</i>    | oligodentia-colorectal cancer syndrome                 | Colorectal cancer                                                                                                              | AD                  | loss-of-function    |

|               |                                                                               |                                                                                                                                                                                  |       |                  |
|---------------|-------------------------------------------------------------------------------|----------------------------------------------------------------------------------------------------------------------------------------------------------------------------------|-------|------------------|
| <i>BAP1</i>   |                                                                               | Melanoma (cutaneous, uveal), Mesothelioma, Meningioma, Lung cancer (adenocarcinoma)                                                                                              | AD    | loss-of-function |
| <i>BARD1</i>  |                                                                               | Breast cancer                                                                                                                                                                    | AD    | loss-of-function |
| <i>BLM</i>    | Bloom syndrome                                                                | Lymphoma and ALL hematological malignancy, Myeloid hematological malignancy, Squamous cell carcinoma, Gastric, Colorectal cancers, Osteosarcoma                                  | AR    | loss-of-function |
| <i>BMPRIA</i> | Juvenile polyposis syndrome                                                   | Colorectal cancer, gastric cancer, hamartoma                                                                                                                                     | AD    | loss-of-function |
| <i>BRAF</i>   | Noonan syndrome                                                               | Cardiofaciocutaneous syndrome                                                                                                                                                    | AD    | gain-of-function |
| <i>BRCA1</i>  | Hereditary breast-ovarian cancer                                              | Breast cancer, Ovarian cancer                                                                                                                                                    | AD    | loss-of-function |
| <i>BRCA2</i>  | Hereditary breast-ovarian cancer<br>Fanconi anemia (D1) (biallelic mutations) | Biallelic mutations: Myeloid hematological malignancy (Medulloblastoma, Wilms tumor).<br>Monoallelic mutations: Breast cancer, Ovarian cancer, Prostate cancer, Pancreas cancer. | AD/AR | loss-of-function |
| <i>BRIP1</i>  | Fanconi anemia (J) (biallelic mutations)                                      | Biallelic mutations: Myeloid hematological malignancy, Squamous cell carcinoma.<br>Monoallelic mutations: Breast cancer, Ovarian cancer.                                         | AD/AR | loss-of-function |
| <i>BUB1B</i>  | Mosaic variegated aneuploidy Syndrome                                         | Wilms Tumor, Rhabdomyosarcoma, Myeloid hematological malignancy                                                                                                                  | AR    | loss-of-function |
| <i>CBL</i>    | Noonan syndrome                                                               | JMML                                                                                                                                                                             | AD    | loss-of-function |
| <i>CDC73</i>  | Hyperparathyroidism-jaw tumor syndrome                                        | Parathyroid cancer, Ossifying fibroma (bone)                                                                                                                                     | AD    | loss-of-function |
| <i>CDH1</i>   | Hereditary diffuse gastric cancer                                             | Breast cancer (lobular), Gastric cancer (diffuse)                                                                                                                                | AD    | loss-of-function |
| <i>CDK4</i>   |                                                                               | Melanoma                                                                                                                                                                         | AD    | gain-of-function |
| <i>CDKN1B</i> |                                                                               | Thyroid cancer, Pituitary adenoma                                                                                                                                                | AD/AR | loss-of-function |
| <i>CDKN1C</i> | Beckwith-Wiedemann Syndrome                                                   | Embryonal tumors                                                                                                                                                                 | AD    | loss-of-function |

|               |                                                                                    |                                                                          |                     |                       |
|---------------|------------------------------------------------------------------------------------|--------------------------------------------------------------------------|---------------------|-----------------------|
| <i>CDKN2A</i> |                                                                                    | Melanoma [p16 and p14ARF], Pancreas cancer [p16 ], Astrocytoma [p14ARF ] | AD                  | loss-of-function      |
| <i>CDKN2B</i> |                                                                                    | renal cell carcinoma                                                     | AD                  | loss-of-function      |
| <i>CEBPA</i>  |                                                                                    | Myeloid hematological malignancy                                         | AD                  | loss-of-function      |
| <i>CEP57</i>  | Mosaic Variegated Aneuploidy Syndrome                                              |                                                                          | AR                  | loss-of-function      |
| <i>CHEK2</i>  |                                                                                    | Breast cancer                                                            | AD                  | loss-of-function      |
| <i>COL7A1</i> | Epidermolysis bullosa                                                              | Squamous cell carcinoma (skin)                                           | AD/AR               | loss-of-function      |
| <i>CREBBP</i> | Rubinstein-Taybi Syndrome                                                          | AML, ovarian cancer, MBL                                                 | AD                  |                       |
| <i>CTCI</i>   | dyskeratosis congenita                                                             | acute myeloid leukemia, Squamous cell carcinoma (head + neck, anorectal) | AR                  | loss-of-function      |
| <i>CTR9</i>   |                                                                                    |                                                                          | AD                  |                       |
| <i>CXCR4</i>  |                                                                                    |                                                                          | AD                  |                       |
| <i>CYLD</i>   | Brooke-Spiegler syndrome                                                           | Cylindroma, spiroadenocarcinoma, Basal cell carcinoma                    | AD                  | loss-of-function      |
| <i>DDB2</i>   | Xeroderma Pigmentosum (E)                                                          | Basal cell carcinoma, Squamous cell carcinoma, Melanoma                  | AD                  | loss-of-function      |
| <i>DDX41</i>  |                                                                                    | MDS/AML                                                                  | AD                  | loss-of-function      |
| <i>DHCR7</i>  | Smith-Lemli-Opitz Syndrome                                                         |                                                                          | AR                  |                       |
| <i>DICER1</i> | DICER1 syndrome                                                                    | Pleuropulmonary blastoma, Cystic nephroma, Ovarian sex cord tumor        | AD                  | loss-of-function      |
| <i>DIS3L2</i> | Perlman syndrome                                                                   | Wilms tumor                                                              | AR                  | loss-of-function      |
| <i>DKC1</i>   | Dyskeratosis congenita                                                             | acute myeloid leukemia, Squamous cell carcinoma (head + neck, anorectal) | X-linked, recessive | loss-of-function      |
| <i>DOCK8</i>  | HyperIgE syndrome                                                                  | Squamous cell carcinoma, Lymphoma                                        | AR                  | loss-of-function      |
| <i>EGFR</i>   |                                                                                    | Non-small cell lung cancer                                               | AD                  | gain-of-function      |
| <i>ELANE</i>  | Severe congenital neutropenia                                                      | Leukemia                                                                 | AD                  | loss-of-function      |
| <i>EP300</i>  | Rubstein-taybi syndrome                                                            | Medulloblastoma                                                          | AD                  | Case Report           |
| <i>EPCAM</i>  | Lynch Syndrome; Hereditary Non-Polyposis Colon Cancer (HNPCC); Muir-Torre Syndrome | Colorectal cancer, Endometrial cancer, Ovarian cancer                    | AD                  | partial gene deletion |

|              |                                                 |                                                                                                                                          |                |                  |
|--------------|-------------------------------------------------|------------------------------------------------------------------------------------------------------------------------------------------|----------------|------------------|
| <i>ERBB4</i> |                                                 | melanoma, gastric, NSCLC                                                                                                                 | unk or de novo |                  |
| <i>ERCC1</i> | Xeroderma Pigmentosa                            |                                                                                                                                          | AR             |                  |
| <i>ERCC2</i> | Xeroderma pigmentosum (D)                       | Basal cell carcinoma, Squamous cell carcinoma, Melanoma                                                                                  | AR             | loss-of-function |
| <i>ERCC3</i> | Xeroderma pigmentosum (B)                       | Basal cell carcinoma, Squamous cell carcinoma, Melanoma                                                                                  | AR             | loss-of-function |
| <i>ERCC4</i> | Xeroderma pigmentosum (F)<br>Fanconi anemia (Q) | Basal cell carcinoma, Squamous cell carcinoma, Melanoma                                                                                  | AR             | loss-of-function |
| <i>ERCC5</i> | Xeroderma pigmentosum (G)                       | Basal cell carcinoma, Squamous cell carcinoma, Melanoma                                                                                  | AR             | loss-of-function |
| <i>ETV6</i>  |                                                 | ALL                                                                                                                                      | AD             |                  |
| <i>EXT1</i>  |                                                 | Chondrosarcoma                                                                                                                           | AD             | loss-of-function |
| <i>EXT2</i>  |                                                 | Chondrosarcoma                                                                                                                           | AD             | loss-of-function |
| <i>EZH2</i>  | Weaver Syndrome                                 | Lymphoid hematological malignancies (lymphoma, lymphoblastic leukemia), neuroblastoma                                                    | AD             | loss-of-function |
| <i>FAH</i>   | Tyrosinemia                                     | Hepatocellular carcinoma                                                                                                                 | AR             | loss-of-function |
| <i>FANCA</i> | Fanconi anemia (A)                              | Myeloid hematological malignancy, Squamous cell carcinoma (head and neck, esophagus, genital tract)                                      | AR             | loss-of-function |
| <i>FANCB</i> | Fanconi Anemia (B)                              | Myeloid hematological malignancy (leukemia, myelodysplastic syndrome); Squamous cell carcinoma (head and neck, esophagus, genital tract) | X-linked       | loss-of-function |
| <i>FANCC</i> | Fanconi anemia (C)                              | Myeloid hematological malignancy, Squamous cell carcinoma (head and neck, esophagus, genital tract)                                      | AR             | loss-of-function |

|                          |                                                         |                                                                                                     |                |                  |
|--------------------------|---------------------------------------------------------|-----------------------------------------------------------------------------------------------------|----------------|------------------|
| <i>FANCD2</i>            | Fanconi Anemia (D2)                                     | Myeloid hematological malignancy, Squamous cell carcinoma (head and neck, esophagus, genital tract) | AR             | loss-of-function |
| <i>FANCE</i>             | Fanconi Anemia (E)                                      | Myeloid hematological malignancy, Squamous cell carcinoma (head and neck, esophagus, genital tract) | AR             | loss-of-function |
| <i>FANCF</i>             | Fanconi Anemia (F)                                      | Myeloid hematological malignancy, Squamous cell carcinoma (head and neck, esophagus, genital tract) | AR             | loss-of-function |
| <i>FANCG</i>             | Fanconi anemia (G)                                      | Myeloid hematological malignancy, Squamous cell carcinoma (head and neck, esophagus, genital tract) | AR             | loss-of-function |
| <i>FANCI</i>             | Fanconi Anemia (I)                                      | Myeloid hematological malignancy, Squamous cell carcinoma (head and neck, esophagus, genital tract) | AR             | loss-of-function |
| <i>FANCL</i>             | Fanconi Anemia (L)                                      | Myeloid hematological malignancy, Squamous cell carcinoma (head and neck, esophagus, genital tract) | AR             | loss-of-function |
| <i>FANCM</i>             | Fanconi Anemia (M)                                      | monoallelic: breast cancer                                                                          | AD/AR          | loss-of-function |
| <i>FAS (aka TNFRSF6)</i> | Autoimmune lymphoproliferative syndrome                 | Lymphoma                                                                                            | AD             | loss-of-function |
| <i>FAT1</i>              |                                                         | oral squamous cell, chemorefractory CLL, head and neck, pancreatic acinar cell carcinoma            | unk or de novo | Limited Data     |
| <i>FGFR2</i>             | albert, crouzon, pfeiffer syndromes (craniosynostosis)  | somatic mutations                                                                                   | AD             | loss-of-function |
| <i>FGFR3</i>             | albert, crouzon, pfeiffer syndromes (craniosynostosis)  | somatic mutations                                                                                   | AD             | loss-of-function |
| <i>FH</i>                | Hereditary leiomyomatosis and renal cell cancer (HLRCC) | Renal cell cancer, Leiomyosarcoma (uterus)                                                          | AD/AR          | loss-of-function |
| <i>FLCN</i>              | Birt-Hogg-Dube syndrome                                 | Renal cell cancer, Oncocytoma                                                                       | AD             | loss-of-function |

|                |                                              |                                                                                              |                     |                  |
|----------------|----------------------------------------------|----------------------------------------------------------------------------------------------|---------------------|------------------|
| <i>FMRI</i>    |                                              |                                                                                              | unk or de novo      |                  |
| <i>FOXE1</i>   |                                              | Thyroid Carcinoma                                                                            | AD                  | Case Report      |
| <i>G6PC</i>    | Glycogen Storage Disease type Ia (GSDIa)     | Hepatocellular carcinoma                                                                     | AR                  |                  |
| <i>GALNT12</i> |                                              | Colon                                                                                        | AD                  | loss-of-function |
| <i>GALNT14</i> |                                              | Neuroblastoma                                                                                | AD                  |                  |
| <i>GATA1</i>   | Diamond-Blackfan Anemia (DBA)                | Myelodysplastic syndrome, Osteosarcoma, Acute myeloid leukemia, Colon adenocarcinoma         | X-linked, recessive | loss-of-function |
| <i>GATA2</i>   | Emberger MonoMAC syndrome; DBA               | Myeloid hematological malignancy, Osteosarcoma, Acute myeloid leukemia, Colon adenocarcinoma | AD                  | loss-of-function |
| <i>GBA</i>     | Gauchers type 1                              | Myeloma, Lymphoma, Hepatocellular carcinoma                                                  | AR                  | loss-of-function |
| <i>GJB2</i>    | Keratosis-ichthyosis-deafness syndrome (KID) | Squamous cell carcinoma                                                                      | AD                  | loss-of-function |
| <i>GLI3</i>    | Pallister-Hall Syndrome                      | hypothalamic hamartoma                                                                       | AD                  | loss-of-function |
| <i>GNAS</i>    |                                              |                                                                                              | unk or de novo      |                  |
| <i>GPC3</i>    | Simpson-Golabi-Behmel syndrome               | Wilms tumor, Hepatoblastoma, hepatocellular carcinoma, Neuroblastoma, Gonadoblastoma         | X-linked, recessive | loss-of-function |
| <i>GPC4</i>    | Simpson-Golabi-Behmel syndrome               | Wilms tumor, Hepatoblastoma, hepatocellular carcinoma, Neuroblastoma, Gonadoblastoma         | X-linked, recessive |                  |
| <i>GREM1</i>   |                                              | Colon                                                                                        | AD                  | gain-of-function |
| <i>GSKIP</i>   |                                              | AML                                                                                          | unk or de novo      | Duplication      |
| <i>HABP2</i>   |                                              | thyroid cancer, nonmedullary                                                                 | AD                  |                  |
| <i>HFE</i>     | Haemochromatosis                             | Hepatocellular carcinoma, Cholangiocarcinoma                                                 | AR                  | loss-of-function |
| <i>HMBS</i>    | Porphyria (AI)                               | hepatocellular carcinoma                                                                     | AD                  | loss-of-function |

|               |                                                      |                                                                                                 |                |                                    |
|---------------|------------------------------------------------------|-------------------------------------------------------------------------------------------------|----------------|------------------------------------|
| <i>HNF1A</i>  | Maturity-Onset Diabetes of The Young, Type 3 (MODY3) | Hepatic adenoma                                                                                 | AD             | loss-of-function                   |
| <i>HOXB13</i> |                                                      | Prostate cancer                                                                                 | AD             | loss-of-function/gain-off-function |
| <i>HRAS</i>   | Costello syndrome                                    | Rhabdomyosarcoma, Neuroblastoma, Transitional cell carcinoma (bladder)                          | AD             | gain-of-function                   |
| <i>IDH1</i>   | Ollier Disease                                       | AML, glioblastoma                                                                               | unk or de novo |                                    |
| <i>IDH2</i>   | Ollier Disease                                       | AML, glioblastoma                                                                               | unk or de novo |                                    |
| <i>IKZF1</i>  |                                                      | ALL                                                                                             | unk or de novo |                                    |
| <i>IPMK</i>   | inherited neuroendocrine tumor of small intestine    | neuroendocrine tumor small intestine                                                            | AD             |                                    |
| <i>ITK</i>    | Lymphoproliferative syndrome 1                       | Hodgkin's lymphoma                                                                              | AR             | loss-of-function                   |
| <i>KIT</i>    |                                                      | Gastro-Intestinal Stromal Tumor                                                                 | AD             | gain-of-function                   |
| <i>KMT2D</i>  | Kabuki syndrome                                      | hepatoblastoma                                                                                  | AD             |                                    |
| <i>KRAS</i>   | Noonan syndrome                                      | JMML, neuroblastoma                                                                             | AD             | gain-of-function                   |
| <i>L2HGDH</i> | L-2-hydroxyglutaric aciduria                         | brain tumor (medulloblastoma, high grade glioma)                                                | AR             | loss-of-function                   |
| <i>LMO1</i>   |                                                      | neuroblastoma                                                                                   | AD             | gain-of-function                   |
| <i>LZTR1</i>  |                                                      | schwannoma                                                                                      | AD             |                                    |
| <i>MAP2K1</i> | mitogen-activated protein kinase kinase 1            | Cardiofaciocutaneous syndrome                                                                   | AD             |                                    |
| <i>MAP2K2</i> | mitogen-activated protein kinase kinase 2            | Cardiofaciocutaneous syndrome                                                                   | AD             |                                    |
| <i>MAX</i>    | Familial paraganglioma-pheochromocytoma syndrome     | Paraganglioma, Pheochromocytoma                                                                 | AD             | loss-of-function                   |
| <i>MC1R</i>   |                                                      | melanoma                                                                                        | AD             |                                    |
| <i>MEN1</i>   | Multiple endocrine neoplasia Type 1                  | Parathyroid, pituitary adenoma, Neuroendocrine tumor, Carcinoid tumor, Adrenocortical carcinoma | AD             | loss-of-function                   |
| <i>MET</i>    |                                                      | Renal cell cancer (papillary carcinoma)                                                         | AD             | gain-of-function                   |
| <i>MITF</i>   |                                                      | melanoma, renal cell carcinoma                                                                  | AD             | gain-of-function                   |



|               |                                                                                                                                  |                                                                                                                                                                                                            |                |                  |
|---------------|----------------------------------------------------------------------------------------------------------------------------------|------------------------------------------------------------------------------------------------------------------------------------------------------------------------------------------------------------|----------------|------------------|
| <i>MLH1</i>   | MMR deficiency syndrome (biallelic mutations); Lynch syndrome / Hereditary Non-Polyposis Colon Cancer (monoallelic mutations)    | Biallelic mutations: Brain tumors, Hematological malignancy, Embryonal tumors.<br>Monoallelic mutations: Colorectal cancer, Endometrial cancer, Ovarian cancer.                                            | AD/AR          | loss-of-function |
| <i>MPL</i>    | Congenital Amegakaryocytic Thrombocytopenia                                                                                      | AML, MDS                                                                                                                                                                                                   | AD/AR          |                  |
| <i>MRE11A</i> |                                                                                                                                  |                                                                                                                                                                                                            | unk or de novo |                  |
| <i>MSH2</i>   | MMR deficiency syndrome (biallelic mutations)<br>Lynch syndrome / Hereditary Non-Polyposis Colon Cancer (monoallelic mutations)  | Biallelic mutations: Brain tumors, Hematological malignancy, Embryonal tumors.<br>Monoallelic mutations: Colorectal cancer, Endometrial cancer, Ovarian cancer, Sebaceous adenoma, carcinoma, epithelioma. | AD/AR          | loss-of-function |
| <i>MSH3</i>   |                                                                                                                                  | colorectal carcinoma                                                                                                                                                                                       | AR             |                  |
| <i>MSH6</i>   | MMR deficiency syndrome (biallelic mutations)<br>Lynch syndrome / Hereditary Non-Polyposis Colon Cancer (monoallelic mutations). | Biallelic mutations: Brain tumors, Hematological malignancy, Embryonal tumors.<br>Monoallelic mutations: Colorectal cancer, Endometrial cancer, Ovarian cancer.                                            | AD/AR          | loss-of-function |
| <i>MTAP</i>   | Diaphyseal medullary stenosis with malignant fibrous histiocytoma (DMS-MFH)                                                      | malignant fibrous histiocytoma (sarcoma)                                                                                                                                                                   | AD             | loss-of-function |
| <i>MUTYH</i>  |                                                                                                                                  | Colorectal cancer                                                                                                                                                                                          | AR             | loss-of-function |
| <i>NBN</i>    | Nijmegen breakage syndrome                                                                                                       | Lymphoma, Medulloblastoma, Glioma, Rhabdomyosarcoma                                                                                                                                                        | AR             | loss-of-function |
| <i>NF1</i>    | Neurofibromatosis type 1                                                                                                         | Glioma, Malignant peripheral nerve sheath tumor                                                                                                                                                            | AD             | loss-of-function |
| <i>NF2</i>    | Neurofibromatosis type 2                                                                                                         | Vestibular schwannoma, Meningioma, Ependymoma                                                                                                                                                              | AD             | loss-of-function |

|               |                                                                          |                                                                                                                                                            |                     |                  |
|---------------|--------------------------------------------------------------------------|------------------------------------------------------------------------------------------------------------------------------------------------------------|---------------------|------------------|
| <i>NFIX</i>   |                                                                          |                                                                                                                                                            | unk or de novo      |                  |
| <i>NHP2</i>   | Dyskeratosis Congenita                                                   | acute myeloid leukemia, Squamous cell carcinoma (head + neck, anorectal), Melanoma                                                                         | AD/AR               |                  |
| <i>NKX2-1</i> |                                                                          | Thyroid carcinoma                                                                                                                                          | AD                  |                  |
| <i>NOTCH3</i> | fibroblastic tumors involving skin, striated muscles, bones, and viscera | Infantile myofibromatosis                                                                                                                                  | AD                  |                  |
| <i>NRAS</i>   | Noonan syndrome                                                          | leukemia - JMML                                                                                                                                            | AD                  |                  |
| <i>NSD1</i>   | Sotos Syndrome                                                           | Neuroblastoma, Presacral ganglioma, Sacrococcygeal teratoma, AML                                                                                           | AD                  | loss-of-function |
| <i>NTHL1</i>  | Familial adenomatous polyposis 3                                         | Colorectal                                                                                                                                                 | AD                  |                  |
| <i>NTRK1</i>  |                                                                          | spitzoid tumor, papillary thyroid                                                                                                                          | AR                  |                  |
| <i>PALB2</i>  | Fanconi anemia (N) (biallelic mutations)                                 | Biallelic mutations: Myeloid hematological malignancy, Medulloblastoma, Neuroblastoma, Wilms tumor. Monoallelic mutations: Breast cancer, Pancreas cancer. | AD/AR               | loss-of-function |
| <i>PARN</i>   | Dyskeratosis congenita                                                   | acute myeloid leukemia, Squamous cell carcinoma (head + neck, anorectal), Melanoma                                                                         | AD/AR               |                  |
| <i>PAX5</i>   | Familial Clustering of Acute Lymphoblastic Leukemia                      | ALL                                                                                                                                                        | AD                  |                  |
| <i>PAX6</i>   | WAGR                                                                     | Wilms                                                                                                                                                      | AD                  | loss-of-function |
| <i>PBRM1</i>  |                                                                          | renal cell carcinoma                                                                                                                                       | AD                  |                  |
| <i>PDGFRA</i> |                                                                          | Gastro-Intestinal Stromal Tumor                                                                                                                            | AD                  | gain-of-function |
| <i>PDGFRB</i> |                                                                          | Infantile myofibromatosis                                                                                                                                  | AD                  |                  |
| <i>PHF6</i>   | Borjeson-Forssman-Lehmann syndrome                                       | t-cell ALL                                                                                                                                                 | X-linked, recessive |                  |
| <i>PHOX2B</i> |                                                                          | Neuroblastoma                                                                                                                                              | AD                  | loss-of-function |
| <i>PMS1</i>   | lynch syndrome                                                           | colon cancer                                                                                                                                               | AD                  |                  |

|                |                                                                                                                                 |                                                                                                                                                                                                 |                |                  |
|----------------|---------------------------------------------------------------------------------------------------------------------------------|-------------------------------------------------------------------------------------------------------------------------------------------------------------------------------------------------|----------------|------------------|
| <i>PMS2</i>    | MMR deficiency syndrome (biallelic mutations)<br>Lynch syndrome / Hereditary Non-Polyposis Colon Cancer (monoallelic mutations) | Biallelic mutations: Brain tumors, Hematological malignancy, Supratentorial primitive, neuroectodermal tumors.<br>Monoallelic mutations: Colorectal cancer, Endometrial cancer, Ovarian cancer. | AD/AR          | loss-of-function |
| <i>POLD1</i>   | PPAP (polymerase proofreading associated polyposis)                                                                             | Colorectal cancer, Endometrial cancer                                                                                                                                                           | AD             | loss-of-function |
| <i>POLE</i>    | PPAP (polymerase proofreading associated polyposis)                                                                             | Colorectal cancer                                                                                                                                                                               | AD/AR          | loss-of-function |
| <i>POLH</i>    | Xeroderma pigmentosa V                                                                                                          | Squamous cell cancer (skin)                                                                                                                                                                     | AR             | loss-of-function |
| <i>POT1</i>    | Familial cutaneous malignant melanoma                                                                                           | melanoma                                                                                                                                                                                        | AD/AR          |                  |
| <i>PPOX</i>    | porphyria                                                                                                                       | hepatocellular carcinoma                                                                                                                                                                        | AD             | loss-of-function |
| <i>PRF1</i>    | Familial Hemophagocytic Lymphohistiocytosis                                                                                     | Lymphoid hematological malignancy (lymphoma)                                                                                                                                                    | AR             | loss-of-function |
| <i>PRKARIA</i> | Carney complex                                                                                                                  | Myxoma (cardiac/cutaneous/breast), Thyroid cancer, Sex cord-stromal tumor                                                                                                                       | AD             | loss-of-function |
| <i>PRSS1</i>   |                                                                                                                                 | Pancreatic cancer                                                                                                                                                                               | AD             | loss-of-function |
| <i>PTCH1</i>   | Nevoid basal cell carcinoma syndrome<br>Gorlin Syndrome                                                                         | Basal cell carcinoma, Medulloblastoma                                                                                                                                                           | AD             | loss-of-function |
| <i>PTCH2</i>   | Nevoid basal cell carcinoma syndrome<br>Gorlin Syndrome                                                                         | Basal cell carcinoma, Medulloblastoma                                                                                                                                                           | AD             | loss-of-function |
| <i>PTEN</i>    | Cowden Syndrome<br>PTEN hamartoma tumor syndrome                                                                                | Breast cancer, Thyroid cancer, Endometrial cancer                                                                                                                                               | AD             | loss-of-function |
| <i>PTPN11</i>  | Noonan syndrome                                                                                                                 | JMML, neuroblastoma                                                                                                                                                                             | AD             | gain-of-function |
| <i>PTPN13</i>  |                                                                                                                                 | colon cancer                                                                                                                                                                                    | unk or de novo |                  |
| <i>RAD51</i>   |                                                                                                                                 |                                                                                                                                                                                                 | unk or de novo |                  |
| <i>RAD51C</i>  | Fanconi anemia (O) (biallelic mutations)                                                                                        | Monoallelic mutations: Ovarian cancer                                                                                                                                                           | AD/AR          | loss-of-function |
| <i>RAD51D</i>  |                                                                                                                                 | Ovarian cancer                                                                                                                                                                                  | AD             | loss-of-function |
| <i>RAF1</i>    | Noonan syndrome                                                                                                                 | JMML, neuroblastoma                                                                                                                                                                             | AD             | gain-of-function |
| <i>RB1</i>     |                                                                                                                                 | Retinoblastoma, Pinealoma, Sarcoma, Melanoma                                                                                                                                                    | AD             | loss-of-function |

|               |                                                                            |                                                                                            |    |                  |
|---------------|----------------------------------------------------------------------------|--------------------------------------------------------------------------------------------|----|------------------|
| <i>RECQL4</i> | Rothmund-Thompson syndrome                                                 | Osteosarcoma, Basal cell carcinoma, Squamous cell carcinoma                                | AR | loss-of-function |
| <i>REST</i>   |                                                                            | Wilms Tumor                                                                                | AD |                  |
| <i>RET</i>    | Multiple endocrine neoplasia 2A/2B<br>Familial medullary thyroid carcinoma | Medullary thyroid cancer,<br>Pheochromocytoma                                              | AD | gain-of-function |
| <i>RHBDF2</i> |                                                                            | Esophageal cancer                                                                          | AD | gain-of-function |
| <i>RPL11</i>  | Diamond-Blackfan Anemia (DBA)                                              | Myelodysplastic syndrome, Osteosarcoma,<br>Acute myeloid leukemia, Colon<br>adenocarcinoma | AD | loss-of-function |
| <i>RPL15</i>  | Diamond-Blackfan Anemia (DBA)                                              | Myelodysplastic syndrome, Osteosarcoma,<br>Acute myeloid leukemia, Colon<br>adenocarcinoma | AD | loss-of-function |
| <i>RPL26</i>  | Diamond-Blackfan Anemia (DBA)                                              | Myelodysplastic syndrome, Osteosarcoma,<br>Acute myeloid leukemia, Colon<br>adenocarcinoma | AD | loss-of-function |
| <i>RPL27</i>  | Diamond-Blackfan Anemia (DBA)                                              | Myelodysplastic syndrome, Osteosarcoma,<br>Acute myeloid leukemia, Colon<br>adenocarcinoma | AD | loss-of-function |
| <i>RPL31</i>  | Diamond-Blackfan Anemia (DBA)                                              | Myelodysplastic syndrome, Osteosarcoma,<br>Acute myeloid leukemia, Colon<br>adenocarcinoma | AD | loss-of-function |
| <i>RPL35A</i> | Diamond-Blackfan Anemia (DBA)                                              | Myelodysplastic syndrome, Osteosarcoma,<br>Acute myeloid leukemia, Colon<br>adenocarcinoma | AD | loss-of-function |
| <i>RPL5</i>   | Diamond-Blackfan Anemia (DBA)                                              | Myelodysplastic syndrome, Osteosarcoma,<br>Acute myeloid leukemia, Colon<br>adenocarcinoma | AD | loss-of-function |
| <i>RPS10</i>  | Diamond-Blackfan Anemia (DBA)                                              | Myelodysplastic syndrome, Osteosarcoma,<br>Acute myeloid leukemia, Colon<br>adenocarcinoma | AD | loss-of-function |

|               |                                                  |                                                                                      |                |                  |
|---------------|--------------------------------------------------|--------------------------------------------------------------------------------------|----------------|------------------|
| <i>RPS19</i>  | Diamond-Blackfan Anemia (DBA)                    | Myelodysplastic syndrome, Osteosarcoma, Acute myeloid leukemia, Colon adenocarcinoma | AD             | loss-of-function |
| <i>RPS24</i>  | Diamond-Blackfan Anemia (DBA)                    | Myelodysplastic syndrome, Osteosarcoma, Acute myeloid leukemia, Colon adenocarcinoma | AD             | loss-of-function |
| <i>RPS26</i>  | Diamond-Blackfan Anemia (DBA)                    | Myelodysplastic syndrome, Osteosarcoma, Acute myeloid leukemia, Colon adenocarcinoma | AD             | loss-of-function |
| <i>RPS27</i>  | Diamond-Blackfan Anemia (DBA)                    | Myelodysplastic syndrome, Osteosarcoma, Acute myeloid leukemia, Colon adenocarcinoma | AD             | loss-of-function |
| <i>RPS29</i>  | Diamond-Blackfan Anemia (DBA)                    | Myelodysplastic syndrome, Osteosarcoma, Acute myeloid leukemia, Colon adenocarcinoma | AD             | loss-of-function |
| <i>RPS7</i>   | Diamond-Blackfan Anemia (DBA)                    | Myelodysplastic syndrome, Osteosarcoma, Acute myeloid leukemia, Colon adenocarcinoma | AD             | loss-of-function |
| <i>RTEL1</i>  | Dyskeratosis congenita                           | acute myeloid leukemia, Squamous cell carcinoma (head + neck, anorectal), Melanoma   | AD/AR          |                  |
| <i>RUNX1</i>  |                                                  | Myeloid hematological malignancy (leukemia)                                          | AD             | loss-of-function |
| <i>SAMD9</i>  |                                                  | MDS                                                                                  | unk or de novo | gain-of-function |
| <i>SAMD9L</i> |                                                  | MDS                                                                                  | unk or de novo | gain-of-function |
| <i>SBDS</i>   | Schwachman-Diamond syndrome                      | Myeloid hematological malignancy                                                     | AR             | loss-of-function |
| <i>SDHA</i>   | Carney-Stratakis syndrome                        | Paranglioma, Pheochromocytoma, Gastrointestinal stromal tumor (GIST)                 | AD/AR          | loss-of-function |
| <i>SDHAF2</i> | Familial paraganglioma-pheochromocytoma syndrome | Paranglioma, Pheochromocytoma                                                        | AD             | loss-of-function |

|                 |                                                  |                                                                              |                     |                  |
|-----------------|--------------------------------------------------|------------------------------------------------------------------------------|---------------------|------------------|
| <i>SDHB</i>     | Familial paraganglioma-pheochromocytoma syndrome | Paraganglioma, Pheochromocytoma, Renal cell cancer                           | AD                  | loss-of-function |
| <i>SDHC</i>     | Familial paraganglioma-pheochromocytoma syndrome | Paraganglioma, Pheochromocytoma, Gastrointestinal stromal tumor (GIST)       | AD                  | loss-of-function |
| <i>SDHD</i>     | Familial paraganglioma-pheochromocytoma syndrome | Paraganglioma, Pheochromocytoma, Gastrointestinal stromal tumor (GIST)       | AD                  | loss-of-function |
| <i>SERPINA1</i> | Alpha1 antitrypsin deficiency                    | Hepatocellular carcinoma                                                     | AR                  | loss-of-function |
| <i>SETBP1</i>   | Schinzal–Giedion Syndrome                        | germ cell tumor, CML, AML                                                    | unk or de novo      | gain-of-function |
| <i>SH2B3</i>    | Susceptibility to ALL                            | Acute Lymphoblastic Leukemia (per CCSS)                                      | AD                  |                  |
| <i>SH2D1A</i>   | Lymphoproliferative disease                      | Lymphoma                                                                     | X-linked, recessive | loss-of-function |
| <i>SHOC2</i>    | Noonan syndrome                                  |                                                                              | AD                  |                  |
| <i>SLC25A13</i> | Citrullinemia                                    | Hepatocellular carcinoma                                                     | AR                  | loss-of-function |
| <i>SLX4</i>     | Fanconi Anemia (P)                               | Squamous cell carcinoma (head and neck)                                      | AR                  | loss-of-function |
| <i>SMAD4</i>    | Juvenile polyposis syndrome                      | Colorectal cancer                                                            | AD                  | loss-of-function |
| <i>SMARCA2</i>  |                                                  |                                                                              | unk or de novo      |                  |
| <i>SMARCA4</i>  | Rhabdoid predisposition syndrome                 | Rhabdoid tumor                                                               | AD                  | loss-of-function |
| <i>SMARCB1</i>  | Rhabdoid predisposition syndrome                 | Rhabdoid tumor (renal, extra-renal), Central primitive neuroectodermal tumor | AD                  | loss-of-function |
| <i>SMARCE1</i>  |                                                  | Meningioma                                                                   | AD                  | loss-of-function |
| <i>SMO</i>      |                                                  | basal cell carcinoma, medulloblastoma                                        | AD                  | gain-of-function |
| <i>SOS1</i>     | Noonan syndrome                                  | Rhabdomyosarcoma                                                             | AD                  | gain-of-function |
| <i>SOS2</i>     | Noonan syndrome                                  | Rhabdomyosarcoma                                                             | AD                  | gain-of-function |
| <i>SPOP</i>     |                                                  | prostate cancer                                                              | unk or de novo      |                  |
| <i>SPRTN</i>    |                                                  | Hepatocellular carcinoma                                                     | unk or de novo      |                  |
| <i>SRP72</i>    |                                                  | Acute myeloid Leukemia                                                       | AD                  | gain-of-function |
| <i>SRY</i>      |                                                  | Gonadoblastoma                                                               | Y-linked            | loss-of-function |
| <i>STAT3</i>    | Hyper-immunoglobulin E syndrome                  | Lymphoma                                                                     | AD                  | loss-of-function |
| <i>STK11</i>    | Peutz-Jeghers syndrome                           | Colorectal cancer, Gastric cancer, Breast cancer<br>Sex cord-stromal tumor   | AD                  | loss-of-function |

|                |                                                                            |                                                                                               |                     |                   |
|----------------|----------------------------------------------------------------------------|-----------------------------------------------------------------------------------------------|---------------------|-------------------|
| <i>SUFU</i>    |                                                                            | Medulloblastoma, meningioma                                                                   | AD                  | loss-of-function  |
| <i>T</i>       |                                                                            | chordoma                                                                                      | unk or de novo      | brachyury homolog |
| <i>TERT</i>    | Dyskeratosis congenita                                                     | acute myeloid leukemia, Squamous cell carcinoma (head + neck, anorectal), Melanoma            | AD/AR               | loss-of-function  |
| <i>TFAP2A</i>  |                                                                            |                                                                                               | unk or de novo      |                   |
| <i>TGFBR1</i>  | Multiple self-healing squamous epithelioma (MSSE); Ferguson-Smith syndrome | Squamous cell carcinoma (skin)                                                                | AD                  | loss-of-function  |
| <i>TGFBR2</i>  | Hereditary non-polyposis colorectal cancer 6                               | Colon Cancer; also uterus, ovary, breast, stomach, small intestine, skin, and larynx          | AD                  |                   |
| <i>TINF2</i>   | Dyskeratosis congenita                                                     | acute myeloid leukemia, Squamous cell carcinoma (head + neck, anorectal), Melanoma            | AD/AR               |                   |
| <i>TMEM127</i> |                                                                            | Pheochromocytoma                                                                              | AD                  | loss-of-function  |
| <i>TP53</i>    | Li-Fraumeni syndrome                                                       | Breast cancer, Sarcoma, Adrenocortical carcinoma, Astrocytoma                                 | AD                  | loss-of-function  |
| <i>TP63</i>    | Ectrodactyly-ectodermal dysplasia-cleft syndrome                           |                                                                                               | AD                  |                   |
| <i>TRIM37</i>  | Mulibrey-nanism                                                            | Wilms tumor                                                                                   | AR                  | loss-of-function  |
| <i>TSC1</i>    | Tuberous sclerosis 1                                                       | Renal cell cancer, angiomyolipoma, Subependymal giant cell astrocytoma, Rhabdomyoma (cardiac) | AD                  | loss-of-function  |
| <i>TSC2</i>    | Tuberous sclerosis 2                                                       | Renal cell cancer, angiomyolipoma, Subependymal giant cell astrocytoma, Rhabdomyoma (cardiac) | AD                  | loss-of-function  |
| <i>TSHR</i>    | Nonautoimmune autosomal dominant hyperthyroidism                           | thyroid neoplasms (papillary and follicular cancers).                                         | AD                  |                   |
| <i>TSR2</i>    | Diamond Blackfan Anemia                                                    | Myelodysplastic syndrome, osteosarcoma, acute myeloid leukemia, colon adenocarcinoma          | X-linked, recessive |                   |

|               |                                                          |                                                                                                                         |                     |                  |
|---------------|----------------------------------------------------------|-------------------------------------------------------------------------------------------------------------------------|---------------------|------------------|
| <i>UROD</i>   | Porphyria (cutanea tarda)                                | hepatocellular carcinoma                                                                                                | AD/AR               | loss-of-function |
| <i>VHL</i>    | Von Hippel-Lindau syndrome                               | Renal cell cancer, Pheochromocytoma, Neuroendocrine tumor (pancreas), Hemangioblastoma (central nervous system, retina) | AD                  | loss-of-function |
| <i>WAS</i>    | Wiskott-Aldrich syndrome<br>WAS-related syndrome         | Lymphoma                                                                                                                | X-linked, recessive | loss-of-function |
| <i>WRAP53</i> | Dyskeratosis Congenita                                   | MDS, AML, head/neck squamous cell cancer, anogenital adenocarcinoma                                                     | AR                  |                  |
| <i>WRN</i>    | Werner syndrome                                          | Sarcoma, melanoma, thyroid cancer                                                                                       | AR                  | loss-of-function |
| <i>WT1</i>    | WAGR syndrome; Denys-Drash syndrome;<br>Frasier syndrome | Wilms tumor, gonadoblastoma                                                                                             | AD                  | loss-of-function |
| <i>XPA</i>    | Xeroderma pigmentosum (A)                                | Basal cell carcinoma, squamous cell carcinoma, melanoma                                                                 | AR                  | loss-of-function |
| <i>XPC</i>    | Xeroderma pigmentosum (C)                                | Basal cell carcinoma, squamous cell carcinoma, melanoma                                                                 | AR                  | loss-of-function |
| <i>XRCC3</i>  |                                                          | Cutaneous malignant melanoma, breast cancer                                                                             | unk or de novo      |                  |

AD, autosomal dominant; AR, autosomal recessive; unk, unknown inheritance; de novo, de novo mutation.



**eTable 3.** Osteosarcoma Candidate Genes and Known Pediatric/Osteosarcoma Somatically Altered Genes Evaluated

| <b>140 Candidate genes†</b> | <b>596 Somatic genes</b> |
|-----------------------------|--------------------------|
| <i>ABCB1</i>                | <i>ABCA13</i>            |
| <i>ABCC2</i>                | <i>ABCA4</i>             |
| <i>ABCC3</i>                | <i>ABCD1</i>             |
| <i>ABCC6</i>                | <i>ABII</i>              |
| <i>ABCG2</i>                | <i>ABL1</i>              |
| <i>ACSL1</i>                | <i>ABL2</i>              |
| <i>ACYP2</i>                | <i>ACKR3</i>             |
| <i>ADAMTS6</i>              | <i>ACSL3</i>             |
| <i>ADRA2A</i>               | <i>ACSL6</i>             |
| <i>AKT1</i>                 | <i>AFF1</i>              |
| <i>APTX</i>                 | <i>AFF3</i>              |
| <i>ARHGAP35</i>             | <i>AFF4</i>              |
| <i>ATRX</i>                 | <i>AKAP9</i>             |
| <i>BAZ2B</i>                | <i>AKT2</i>              |
| <i>BCL2L11</i>              | <i>ALDH2</i>             |
| <i>BMP2</i>                 | <i>AMBRA1</i>            |
| <i>CA1</i>                  | <i>AMER1</i>             |
| <i>CAMK2D</i>               | <i>AMMECR1</i>           |
| <i>CCNA1</i>                | <i>ANKHDI</i>            |
| <i>CCNA2</i>                | <i>ANKRD50</i>           |
| <i>CCNB1</i>                | <i>APP</i>               |
| <i>CCNB2</i>                | <i>ARAP3</i>             |
| <i>CCNE2</i>                | <i>ARHGAP26</i>          |
| <i>CCNH</i>                 | <i>ARHGEF12</i>          |
| <i>CD3EAP</i>               | <i>ARID1A</i>            |
| <i>CD86</i>                 | <i>ARID1B</i>            |
| <i>CDC6</i>                 | <i>ARID2</i>             |
| <i>CHEK1</i>                | <i>ARID5B</i>            |
| <i>CKS1B</i>                | <i>ARIHI</i>             |
| <i>CNOT1</i>                | <i>ARNT</i>              |

|                |  |                |
|----------------|--|----------------|
| <i>CNOT4</i>   |  | <i>ASCL3</i>   |
| <i>COL18A1</i> |  | <i>ASPSCR1</i> |
| <i>COL1A1</i>  |  | <i>ATAD2B</i>  |
| <i>COL1A2</i>  |  | <i>ATF1</i>    |
| <i>COL2A1</i>  |  | <i>ATIC</i>    |
| <i>COX8A</i>   |  | <i>ATXN2</i>   |
| <i>CTGF</i>    |  | <i>BAX</i>     |
| <i>CTLA4</i>   |  | <i>BCL10</i>   |
| <i>CTSK</i>    |  | <i>BCL11A</i>  |
| <i>CXCL13</i>  |  | <i>BCL11B</i>  |
| <i>CYP2C8</i>  |  | <i>BCL2</i>    |
| <i>CYP27A1</i> |  | <i>BCL3</i>    |
| <i>DHFR</i>    |  | <i>BCL6</i>    |
| <i>DPYD</i>    |  | <i>BCL7A</i>   |
| <i>DROSHA</i>  |  | <i>BCL9</i>    |
| <i>EDN1</i>    |  | <i>BCOR</i>    |
| <i>EGR1</i>    |  | <i>BCR</i>     |
| <i>ERCC6</i>   |  | <i>BICC1</i>   |
| <i>ESR1</i>    |  | <i>BIRC3</i>   |
| <i>FGF2</i>    |  | <i>BIRC5</i>   |
| <i>FOS</i>     |  | <i>BMP4</i>    |
| <i>GEMIN4</i>  |  | <i>BRD3</i>    |
| <i>GGN</i>     |  | <i>BRD4</i>    |
| <i>GHI</i>     |  | <i>BTG1</i>    |
| <i>GLDC</i>    |  | <i>BTK</i>     |
| <i>GNAS</i>    |  | <i>BUB1</i>    |
| <i>GNRH2</i>   |  | <i>C2orf44</i> |
| <i>GRM4</i>    |  | <i>CACNA1E</i> |
| <i>GSTK1</i>   |  | <i>CAMTA1</i>  |
| <i>GSTM1</i>   |  | <i>CANT1</i>   |
| <i>GSTM3</i>   |  | <i>CARD11</i>  |
| <i>GSTP1</i>   |  | <i>CARS</i>    |
| <i>GSTT1</i>   |  | <i>CASC5</i>   |

|                           |  |                 |
|---------------------------|--|-----------------|
| <i>IGF1</i>               |  | <i>CASP10</i>   |
| <i>IGF2R</i>              |  | <i>CASP8</i>    |
| <i>IGFALS</i>             |  | <i>CBFA2T3</i>  |
| <i>IL10</i>               |  | <i>CBFB</i>     |
| <i>IL12A</i>              |  | <i>CBLB</i>     |
| <i>IL12B</i>              |  | <i>CBLC</i>     |
| <i>IL16</i>               |  | <i>CCDC6</i>    |
| <i>IL1B</i>               |  | <i>CCK</i>      |
| <i>IL23A</i>              |  | <i>CCNB1IP1</i> |
| <i>IL23B (aka IL12B)</i>  |  | <i>CCND1</i>    |
| <i>IL27</i>               |  | <i>CCND2</i>    |
| <i>IL33</i>               |  | <i>CCND3</i>    |
| <i>IL6</i>                |  | <i>CCNE1</i>    |
| <i>IL8RA (aka CXCR2)</i>  |  | <i>CD274</i>    |
| <i>IL8RB (aka CXCR1)</i>  |  | <i>CD2AP</i>    |
| <i>ITGA3</i>              |  | <i>CD74</i>     |
| <i>JUN</i>                |  | <i>CD79A</i>    |
| <i>KEAP1</i>              |  | <i>CD79B</i>    |
| <i>LOX</i>                |  | <i>CD99</i>     |
| <i>LTA</i>                |  | <i>CDC25A</i>   |
| <i>LY75</i>               |  | <i>CDH11</i>    |
| <i>MCM5</i>               |  | <i>CDH2</i>     |
| <i>MDM1</i>               |  | <i>CDH9</i>     |
| <i>MDM2</i>               |  | <i>CDK12</i>    |
| <i>MIR34B</i>             |  | <i>CDK2</i>     |
| <i>MIR34C</i>             |  | <i>CDK6</i>     |
| <i>MLF1IP (aka CENPU)</i> |  | <i>CDKN1A</i>   |
| <i>MMS19</i>              |  | <i>CDKN2C</i>   |
| <i>MPG</i>                |  | <i>CDX2</i>     |
| <i>MPO</i>                |  | <i>CHCHD7</i>   |
| <i>MTHFD1</i>             |  | <i>CHD3</i>     |
| <i>MTHFR</i>              |  | <i>CHD9</i>     |
| <i>MTR</i>                |  | <i>CHIC2</i>    |

|                               |  |                |
|-------------------------------|--|----------------|
| <i>NAF1</i>                   |  | <i>CHN1</i>    |
| <i>NDUFS4</i>                 |  | <i>CIC</i>     |
| <i>NFE2L2</i>                 |  | <i>CIITA</i>   |
| <i>NFIB</i>                   |  | <i>CITED2</i>  |
| <i>NR1H2</i>                  |  | <i>CLP1</i>    |
| <i>NUBP2</i>                  |  | <i>CLTC</i>    |
| <i>OBFC1</i>                  |  | <i>CLTCL1</i>  |
| <i>OR2T5</i>                  |  | <i>CNBP</i>    |
| <i>OR7A1P</i>                 |  | <i>CNTN5</i>   |
| <i>PARP2</i>                  |  | <i>CNTRL</i>   |
| <i>PCNA</i>                   |  | <i>COL10A1</i> |
| <i>PECAM1</i>                 |  | <i>COL5A3</i>  |
| <i>PIK3CA</i>                 |  | <i>COLCA2</i>  |
| <i>POMC</i>                   |  | <i>COPS3</i>   |
| <i>PONI</i>                   |  | <i>COX6C</i>   |
| <i>PPP1R13L</i>               |  | <i>CREB1</i>   |
| <i>PPP1R13L</i>               |  | <i>CREB3L1</i> |
| <i>PRKCG</i>                  |  | <i>CREB3L2</i> |
| <i>RECOL5</i>                 |  | <i>CRLF2</i>   |
| <i>RFC1</i>                   |  | <i>CRTC1</i>   |
| <i>RNR1</i>                   |  | <i>CRTC3</i>   |
| <i>SGPL1</i>                  |  | <i>CSDE1</i>   |
| <i>SHMT1</i>                  |  | <i>CSMD1</i>   |
| <i>SLCO1B1</i>                |  | <i>CTDNEP1</i> |
| <i>SND1</i>                   |  | <i>CTNNB1</i>  |
| <i>SQSTM1</i>                 |  | <i>CUL3</i>    |
| <i>SSSCA1</i>                 |  | <i>CUX1</i>    |
| <i>TERF1</i>                  |  | <i>DAB1</i>    |
| <i>TGFB1</i>                  |  | <i>DAPK1</i>   |
| <i>TNF<math>\alpha</math></i> |  | <i>DAXX</i>    |
| <i>TNFRSF11A</i>              |  | <i>DCC</i>     |
| <i>TNFRSF11B</i>              |  | <i>DCDC2</i>   |
| <i>TP53BP2</i>                |  | <i>DDIT3</i>   |

|               |  |               |
|---------------|--|---------------|
| <i>TRNS1</i>  |  | <i>DDX1</i>   |
| <i>TXN2</i>   |  | <i>DDX10</i>  |
| <i>TYMS</i>   |  | <i>DDX5</i>   |
| <i>VCP</i>    |  | <i>DDX6</i>   |
| <i>VDR</i>    |  | <i>DEK</i>    |
| <i>VEGFA</i>  |  | <i>DIP2B</i>  |
| <i>VIP</i>    |  | <i>DLC1</i>   |
| <i>VIPR2</i>  |  | <i>DLEU2</i>  |
| <i>XRCC1</i>  |  | <i>DLG2</i>   |
| <i>XRCC5</i>  |  | <i>DNAH17</i> |
| <i>ZNF208</i> |  | <i>DNAH5</i>  |
|               |  | <i>DNAJA2</i> |
|               |  | <i>DNM2</i>   |
|               |  | <i>DNMT3A</i> |
|               |  | <i>DOCK5</i>  |
|               |  | <i>DUSP10</i> |
|               |  | <i>DUX4L1</i> |
|               |  | <i>E2F1</i>   |
|               |  | <i>E2F3</i>   |
|               |  | <i>EBF1</i>   |
|               |  | <i>ECT2L</i>  |
|               |  | <i>EGR2</i>   |
|               |  | <i>EIF3H</i>  |
|               |  | <i>EIF4A1</i> |
|               |  | <i>EIF4A2</i> |
|               |  | <i>ELF4</i>   |
|               |  | <i>ELK4</i>   |
|               |  | <i>ELL</i>    |
|               |  | <i>ELN</i>    |
|               |  | <i>EML4</i>   |
|               |  | <i>EPB41</i>  |
|               |  | <i>EPS15</i>  |
|               |  | <i>ERAS</i>   |

|  |                |
|--|----------------|
|  | <i>ERBB2</i>   |
|  | <i>ERBB3</i>   |
|  | <i>ERC1</i>    |
|  | <i>ERG</i>     |
|  | <i>ETS1</i>    |
|  | <i>ETV1</i>    |
|  | <i>ETV4</i>    |
|  | <i>ETV5</i>    |
|  | <i>EWSR1</i>   |
|  | <i>EXD2</i>    |
|  | <i>EZR</i>     |
|  | <i>FAM175A</i> |
|  | <i>FAM46C</i>  |
|  | <i>FAP</i>     |
|  | <i>FASLG</i>   |
|  | <i>FBXL12</i>  |
|  | <i>FBXO11</i>  |
|  | <i>FBXW7</i>   |
|  | <i>FCGR2B</i>  |
|  | <i>FCRL4</i>   |
|  | <i>FEV</i>     |
|  | <i>FGF9</i>    |
|  | <i>FGFR1</i>   |
|  | <i>FGFR1OP</i> |
|  | <i>FHIT</i>    |
|  | <i>FIP1L1</i>  |
|  | <i>FLI1</i>    |
|  | <i>FLNA</i>    |
|  | <i>FLT3</i>    |
|  | <i>FMNL3</i>   |
|  | <i>FNBP1</i>   |
|  | <i>FOXL2</i>   |
|  | <i>FOXO1</i>   |

|  |  |               |
|--|--|---------------|
|  |  | <i>FOXO3</i>  |
|  |  | <i>FOXO4</i>  |
|  |  | <i>FOXP1</i>  |
|  |  | <i>FRG1</i>   |
|  |  | <i>FRG2</i>   |
|  |  | <i>FSTL3</i>  |
|  |  | <i>FUBP1</i>  |
|  |  | <i>FUS</i>    |
|  |  | <i>G6PC3</i>  |
|  |  | <i>GAA</i>    |
|  |  | <i>GAB1</i>   |
|  |  | <i>GABRG2</i> |
|  |  | <i>GAR1</i>   |
|  |  | <i>GAS7</i>   |
|  |  | <i>GATA3</i>  |
|  |  | <i>GGNBP2</i> |
|  |  | <i>GIGYF2</i> |
|  |  | <i>GLDN</i>   |
|  |  | <i>GLI1</i>   |
|  |  | <i>GLI2</i>   |
|  |  | <i>GMPS</i>   |
|  |  | <i>GNAI1</i>  |
|  |  | <i>GNAQ</i>   |
|  |  | <i>GOLGA5</i> |
|  |  | <i>GOPC</i>   |
|  |  | <i>GPHN</i>   |
|  |  | <i>GRB10</i>  |
|  |  | <i>GRIN3A</i> |
|  |  | <i>GSK3B</i>  |
|  |  | <i>H3F3A</i>  |
|  |  | <i>HAS3</i>   |
|  |  | <i>HAX1</i>   |
|  |  | <i>HCN1</i>   |

|  |                  |
|--|------------------|
|  | <i>HECTD4</i>    |
|  | <i>HECW1</i>     |
|  | <i>HERPUD1</i>   |
|  | <i>HEY1</i>      |
|  | <i>HIP1</i>      |
|  | <i>HIST1H4I</i>  |
|  | <i>HLF</i>       |
|  | <i>HMGA1</i>     |
|  | <i>HMGA2</i>     |
|  | <i>HMGN2P46</i>  |
|  | <i>HNRNPA2B1</i> |
|  | <i>HOOK3</i>     |
|  | <i>HOXA11</i>    |
|  | <i>HOXA13</i>    |
|  | <i>HOXA9</i>     |
|  | <i>HOXC11</i>    |
|  | <i>HOXC13</i>    |
|  | <i>HOXD11</i>    |
|  | <i>HOXD13</i>    |
|  | <i>HS3ST4</i>    |
|  | <i>HSP90AA1</i>  |
|  | <i>HSP90AB1</i>  |
|  | <i>HUWE1</i>     |
|  | <i>IBSP</i>      |
|  | <i>IFNA1</i>     |
|  | <i>IFNG</i>      |
|  | <i>IGF1R</i>     |
|  | <i>IGFBP5</i>    |
|  | <i>IL2</i>       |
|  | <i>IL21R</i>     |
|  | <i>IL6ST</i>     |
|  | <i>IL7R</i>      |
|  | <i>INO80</i>     |



|  |                 |
|--|-----------------|
|  | <i>IRF4</i>     |
|  | <i>ITCH</i>     |
|  | <i>ITGA5</i>    |
|  | <i>JAK1</i>     |
|  | <i>JAK2</i>     |
|  | <i>JAK3</i>     |
|  | <i>JAZF1</i>    |
|  | <i>KAT6A</i>    |
|  | <i>KAT6B</i>    |
|  | <i>KCND1</i>    |
|  | <i>KDM5A</i>    |
|  | <i>KDM5C</i>    |
|  | <i>KDM6A</i>    |
|  | <i>KDR</i>      |
|  | <i>KDSR</i>     |
|  | <i>KIAA1549</i> |
|  | <i>KIF1B</i>    |
|  | <i>KIF5B</i>    |
|  | <i>KIRREL</i>   |
|  | <i>KLF6</i>     |
|  | <i>KLHL28</i>   |
|  | <i>KLK2</i>     |
|  | <i>KMT2A</i>    |
|  | <i>KMT2C</i>    |
|  | <i>KMT2D</i>    |
|  | <i>KPNA1</i>    |
|  | <i>KPNB1</i>    |
|  | <i>KRT15</i>    |
|  | <i>KRT36</i>    |
|  | <i>KTNI</i>     |
|  | <i>LAMA5</i>    |
|  | <i>LASPI</i>    |
|  | <i>LCK</i>      |

|  |                |
|--|----------------|
|  | <i>LCPI</i>    |
|  | <i>LHFP</i>    |
|  | <i>LIFR</i>    |
|  | <i>LMO2</i>    |
|  | <i>LMO7</i>    |
|  | <i>LOR</i>     |
|  | <i>LPP</i>     |
|  | <i>LRCH1</i>   |
|  | <i>LRIG3</i>   |
|  | <i>LRP1B</i>   |
|  | <i>LRP2</i>    |
|  | <i>LRRFIP2</i> |
|  | <i>LSAMP</i>   |
|  | <i>LYL1</i>    |
|  | <i>MAF</i>     |
|  | <i>MAFB</i>    |
|  | <i>MALAT1</i>  |
|  | <i>MALT1</i>   |
|  | <i>MAML2</i>   |
|  | <i>MAP2K4</i>  |
|  | <i>MAPT</i>    |
|  | <i>MCL1</i>    |
|  | <i>MDC1</i>    |
|  | <i>MDM4</i>    |
|  | <i>MDN1</i>    |
|  | <i>MDS2</i>    |
|  | <i>MECOM</i>   |
|  | <i>MED12</i>   |
|  | <i>MEF2A</i>   |
|  | <i>MEF2C</i>   |
|  | <i>MFN2</i>    |
|  | <i>MGMT</i>    |
|  | <i>MKL1</i>    |

|  |                |
|--|----------------|
|  | <i>MLF1</i>    |
|  | <i>MLLT1</i>   |
|  | <i>MLLT10</i>  |
|  | <i>MLLT11</i>  |
|  | <i>MLLT3</i>   |
|  | <i>MLLT4</i>   |
|  | <i>MLLT6</i>   |
|  | <i>MNI</i>     |
|  | <i>MNX1</i>    |
|  | <i>MORF4L1</i> |
|  | <i>MPRIP</i>   |
|  | <i>MROH2B</i>  |
|  | <i>MSI2</i>    |
|  | <i>MSN</i>     |
|  | <i>MSRB3</i>   |
|  | <i>MTCP1</i>   |
|  | <i>MTPN</i>    |
|  | <i>MUC1</i>    |
|  | <i>MUC16</i>   |
|  | <i>MYB</i>     |
|  | <i>MYC</i>     |
|  | <i>MYC-C</i>   |
|  | <i>MYCL</i>    |
|  | <i>MYCN</i>    |
|  | <i>MYD88</i>   |
|  | <i>MYH10</i>   |
|  | <i>MYNN</i>    |
|  | <i>NACA</i>    |
|  | <i>NANOS1</i>  |
|  | <i>NBAS</i>    |
|  | <i>NCAPD2</i>  |
|  | <i>NCKIPSD</i> |
|  | <i>NCOA1</i>   |

|  |               |
|--|---------------|
|  | <i>NCOA2</i>  |
|  | <i>NCOA4</i>  |
|  | <i>NDRG1</i>  |
|  | <i>NEFM</i>   |
|  | <i>NEK2</i>   |
|  | <i>NFKB1</i>  |
|  | <i>NFKB2</i>  |
|  | <i>NIN</i>    |
|  | <i>NKTR</i>   |
|  | <i>NONO</i>   |
|  | <i>NOTCH1</i> |
|  | <i>NOTCH2</i> |
|  | <i>NPAT</i>   |
|  | <i>NPM1</i>   |
|  | <i>NR0B1</i>  |
|  | <i>NR4A3</i>  |
|  | <i>NRG1</i>   |
|  | <i>NTRK3</i>  |
|  | <i>NUMA1</i>  |
|  | <i>NUP214</i> |
|  | <i>NUP98</i>  |
|  | <i>NUTM1</i>  |
|  | <i>NUTM2A</i> |
|  | <i>NUTM2B</i> |
|  | <i>OLIG2</i>  |
|  | <i>OMD</i>    |
|  | <i>OR1B1</i>  |
|  | <i>OTX2</i>   |
|  | <i>P2RY8</i>  |
|  | <i>PALLD</i>  |
|  | <i>PAPOLA</i> |
|  | <i>PATZ1</i>  |
|  | <i>PAX3</i>   |

|  |                 |
|--|-----------------|
|  | <i>PAX7</i>     |
|  | <i>PAX8</i>     |
|  | <i>PBX1</i>     |
|  | <i>PCDH10</i>   |
|  | <i>PCMI</i>     |
|  | <i>PCSK7</i>    |
|  | <i>PDCD1LG2</i> |
|  | <i>PDE4DIP</i>  |
|  | <i>PDGFB</i>    |
|  | <i>PER1</i>     |
|  | <i>PICALM</i>   |
|  | <i>PIK3R1</i>   |
|  | <i>PIMI</i>     |
|  | <i>PINK1</i>    |
|  | <i>PKHD1</i>    |
|  | <i>PKHD1L1</i>  |
|  | <i>PLAG1</i>    |
|  | <i>PLG</i>      |
|  | <i>PMEL</i>     |
|  | <i>PML</i>      |
|  | <i>POLD3</i>    |
|  | <i>POU2AF1</i>  |
|  | <i>POU5F1</i>   |
|  | <i>PPARG</i>    |
|  | <i>PPARGCIA</i> |
|  | <i>PPM1D</i>    |
|  | <i>PPP1R1A</i>  |
|  | <i>PPP2R1A</i>  |
|  | <i>PPP3CA</i>   |
|  | <i>PPP6R3</i>   |
|  | <i>PRCC</i>     |
|  | <i>PRDM1</i>    |
|  | <i>PRDM16</i>   |

|  |                 |
|--|-----------------|
|  | <i>PRDM5</i>    |
|  | <i>PRRX1</i>    |
|  | <i>PSIP1</i>    |
|  | <i>PSME4</i>    |
|  | <i>PTPRS</i>    |
|  | <i>QKI</i>      |
|  | <i>RAB27A</i>   |
|  | <i>RABEP1</i>   |
|  | <i>RAD50</i>    |
|  | <i>RAD51B</i>   |
|  | <i>RAG1</i>     |
|  | <i>RAG2</i>     |
|  | <i>RALGDS</i>   |
|  | <i>RANBP17</i>  |
|  | <i>RAP1GDS1</i> |
|  | <i>RARA</i>     |
|  | <i>RASSF1</i>   |
|  | <i>RBL2</i>     |
|  | <i>RBM15</i>    |
|  | <i>RBM8A</i>    |
|  | <i>REL</i>      |
|  | <i>RFWD2</i>    |
|  | <i>RHOH</i>     |
|  | <i>RHPN2</i>    |
|  | <i>RICTOR</i>   |
|  | <i>RMI2</i>     |
|  | <i>RNF213</i>   |
|  | <i>ROS1</i>     |
|  | <i>RPL22</i>    |
|  | <i>RPNI</i>     |
|  | <i>RUNX1T1</i>  |
|  | <i>RUNX2</i>    |
|  | <i>RYR3</i>     |

|  |                 |
|--|-----------------|
|  | <i>SACS</i>     |
|  | <i>SAMD4A</i>   |
|  | <i>SCAF8</i>    |
|  | <i>SCG5</i>     |
|  | <i>SCN7A</i>    |
|  | <i>SCN9A</i>    |
|  | <i>SDC4</i>     |
|  | <i>SEMA4D</i>   |
|  | <i>SEMA6D</i>   |
|  | <i>SEPT5</i>    |
|  | <i>SEPT9</i>    |
|  | <i>SERINC3</i>  |
|  | <i>SERPINA6</i> |
|  | <i>SET</i>      |
|  | <i>SETD2</i>    |
|  | <i>SF3B1</i>    |
|  | <i>SFPQ</i>     |
|  | <i>SGSM1</i>    |
|  | <i>SH3GL1</i>   |
|  | <i>SH3PXD2A</i> |
|  | <i>SHROOM2</i>  |
|  | <i>SIK3</i>     |
|  | <i>SLC26A10</i> |
|  | <i>SLC34A2</i>  |
|  | <i>SLC37A4</i>  |
|  | <i>SLC45A3</i>  |
|  | <i>SLITRK1</i>  |
|  | <i>SMAD7</i>    |
|  | <i>SMARCA5</i>  |
|  | <i>SMC1A</i>    |
|  | <i>SMEK1</i>    |
|  | <i>SNF607</i>   |
|  | <i>SNX29</i>    |

|  |  |                |
|--|--|----------------|
|  |  | <i>SOCS1</i>   |
|  |  | <i>SOX2</i>    |
|  |  | <i>SPAG17</i>  |
|  |  | <i>SPATA16</i> |
|  |  | <i>SPECC1</i>  |
|  |  | <i>SPPI</i>    |
|  |  | <i>SPRED1</i>  |
|  |  | <i>SRCAP</i>   |
|  |  | <i>SRGAP2</i>  |
|  |  | <i>SRGAP3</i>  |
|  |  | <i>SRSF2</i>   |
|  |  | <i>SRSF3</i>   |
|  |  | <i>SS18</i>    |
|  |  | <i>SS18L1</i>  |
|  |  | <i>SSX1</i>    |
|  |  | <i>SSX2</i>    |
|  |  | <i>SSX4</i>    |
|  |  | <i>STAG2</i>   |
|  |  | <i>STX11</i>   |
|  |  | <i>STXBP2</i>  |
|  |  | <i>SUZ12</i>   |
|  |  | <i>SYK</i>     |
|  |  | <i>TAF15</i>   |
|  |  | <i>TAL1</i>    |
|  |  | <i>TAL2</i>    |
|  |  | <i>TANC1</i>   |
|  |  | <i>TARDBP</i>  |
|  |  | <i>TCEA1</i>   |
|  |  | <i>TCF12</i>   |
|  |  | <i>TCF3</i>    |
|  |  | <i>TCF7L1</i>  |
|  |  | <i>TCF7L2</i>  |
|  |  | <i>TCL1A</i>   |



|  |                  |
|--|------------------|
|  | <i>TCL6</i>      |
|  | <i>TET1</i>      |
|  | <i>TET2</i>      |
|  | <i>TFE3</i>      |
|  | <i>TFEB</i>      |
|  | <i>TFG</i>       |
|  | <i>TFPT</i>      |
|  | <i>TFRC</i>      |
|  | <i>TH</i>        |
|  | <i>THADA</i>     |
|  | <i>THBS1</i>     |
|  | <i>THRAP3</i>    |
|  | <i>THSD4</i>     |
|  | <i>TIE1</i>      |
|  | <i>TIMP3</i>     |
|  | <i>TLX1</i>      |
|  | <i>TLX3</i>      |
|  | <i>TMEM52</i>    |
|  | <i>TMPRSS2</i>   |
|  | <i>TNC</i>       |
|  | <i>TNFAIP3</i>   |
|  | <i>TNFRSF10D</i> |
|  | <i>TNFRSF14</i>  |
|  | <i>TNFRSF17</i>  |
|  | <i>TNFSF10</i>   |
|  | <i>TNRC6A</i>    |
|  | <i>TNS3</i>      |
|  | <i>TOP1</i>      |
|  | <i>TPM3</i>      |
|  | <i>TPM4</i>      |
|  | <i>TPR</i>       |
|  | <i>TRIM24</i>    |
|  | <i>TRIM27</i>    |

|  |               |
|--|---------------|
|  | <i>TRIM33</i> |
|  | <i>TRIP11</i> |
|  | <i>TTL</i>    |
|  | <i>TTN</i>    |
|  | <i>TYK2</i>   |
|  | <i>U2AF1</i>  |
|  | <i>UBE2D3</i> |
|  | <i>UBE3A</i>  |
|  | <i>UNC13D</i> |
|  | <i>USH2A</i>  |
|  | <i>USP6</i>   |
|  | <i>USP9X</i>  |
|  | <i>VAPA</i>   |
|  | <i>VNN3</i>   |
|  | <i>VTIL1A</i> |
|  | <i>WAC</i>    |
|  | <i>WDR33</i>  |
|  | <i>WHSC1</i>  |
|  | <i>WIF1</i>   |
|  | <i>WNK1</i>   |
|  | <i>WWTR1</i>  |
|  | <i>XPO1</i>   |
|  | <i>XRCC2</i>  |
|  | <i>YIPF3</i>  |
|  | <i>YWHAE</i>  |
|  | <i>ZBTB16</i> |
|  | <i>ZBTB42</i> |
|  | <i>ZFAND4</i> |
|  | <i>ZFHX3</i>  |
|  | <i>ZHX3</i>   |
|  | <i>ZMIZ1</i>  |
|  | <i>ZMYM2</i>  |
|  | <i>ZMYM3</i>  |

|  |  |               |
|--|--|---------------|
|  |  | <i>ZNF331</i> |
|  |  | <i>ZNF384</i> |
|  |  | <i>ZNF521</i> |
|  |  | <i>ZNF638</i> |
|  |  | <i>ZRSR2</i>  |

† Genes lists do not overlap; candidate genes that were also known somatically altered genes were included as a candidate gene.

**eTable 4.** Details of Criteria for Classification of Pathogenicity Categories

| ClinVar | InterVar | Classic High Impact | HGMD DM  | In silico <sup>‡</sup> | PopMax and TotalCount <sup>†</sup> | Automated Classification | Manual review <sup>‡</sup> |
|---------|----------|---------------------|----------|------------------------|------------------------------------|--------------------------|----------------------------|
| P       |          |                     |          |                        | Pass                               | P                        | Final Bin: P, LP, VUS_D    |
|         |          |                     |          |                        | Fail                               | VUS_ND                   |                            |
| LP      |          |                     |          |                        | Pass                               | LP                       | Final Bin: P, LP, VUS_D    |
|         |          |                     |          |                        | Fail                               | VUS_ND                   |                            |
| VUS     |          | Yes                 | Yes      |                        | Pass                               | LP                       | Final Bin: LP, VUS_D       |
|         |          |                     |          |                        | Fail                               | VUS_ND                   |                            |
|         |          | Yes                 |          |                        | Pass                               | VUS_D                    | Final Bin: LP, VUS_D       |
|         |          |                     |          |                        | Fail                               | VUS_ND                   |                            |
|         |          |                     | Yes      |                        | Pass                               | VUS_D                    | Final Bin: LP, VUS_D       |
|         |          |                     |          |                        | Fail                               | VUS_ND                   |                            |
|         |          |                     |          | Damaging               | Pass                               | VUS_D                    |                            |
|         |          |                     |          |                        | Fail                               | VUS_ND                   |                            |
|         |          |                     |          |                        | VUS_ND                             |                          |                            |
| LB      |          |                     |          |                        |                                    | LB                       |                            |
| B       |          |                     |          |                        |                                    | B                        |                            |
| NA      | P        |                     |          |                        | Pass                               | P                        | Final Bin: P, LP, VUS_D    |
|         |          |                     |          |                        | Fail                               | VUS_ND                   |                            |
|         | LP       |                     |          |                        | Pass                               | LP                       | Final Bin: LP, VUS_D       |
|         |          |                     |          |                        | Fail                               | VUS_ND                   |                            |
|         | VUS/NA   | Yes                 | Yes      |                        | Pass                               | LP                       | Final Bin: LP, VUS_D       |
|         |          |                     |          |                        | Fail                               | VUS_ND                   |                            |
|         |          | Yes                 |          |                        | Pass                               | VUS_D                    | Final Bin: LP, VUS_D       |
|         |          |                     |          |                        | Fail                               | VUS_ND                   |                            |
|         |          | Yes                 |          | Pass                   | VUS_D                              | Final Bin: LP, VUS_D     |                            |
|         |          |                     |          | Fail                   | VUS_ND                             |                          |                            |
|         |          |                     | Damaging | Pass                   | VUS_D                              |                          |                            |

|  |    |  |  |  |      |        |  |
|--|----|--|--|--|------|--------|--|
|  |    |  |  |  | Fail | VUS_ND |  |
|  |    |  |  |  |      | VUS_ND |  |
|  | LB |  |  |  |      | LB     |  |
|  | B  |  |  |  |      | B      |  |

P = pathogenic, LP = likely pathogenic, VUS\_D = variant of uncertain significance (VUS) *in silico* predicted damaging, VUS\_ND = VUS *in silico* predicted not damaging, LB = likely benign, B = benign.

¥ Damaging *in silico* is REVEL  $\geq 0.5$  and CADD  $\geq 20$  and MetaSVM = D.

† PopMax  $\leq 0.005$  for AR genes and  $\leq 0.001$  for non-AR genes; TotalCount  $\leq 10$ .

‡ Based on review of literature confirming pathogenicity, gene specific database review, phenotype within the spectrum of associated syndrome or cancer, mutation impact on gene function and mechanism of action.

**eTable 5.** Details of Pathogenic and Likely Pathogenic Variants in 1004 Patients With Osteosarcoma in Discovery Set

| Path. Score | No. cases | Chr  | Position  | REF | ALT | Gene       | Gene Inher. | HGVS.c                                                                                   | HGVS.p                                                                    | CytoBand                                        | Effect                                 | Impact   | Pop Max Freq |
|-------------|-----------|------|-----------|-----|-----|------------|-------------|------------------------------------------------------------------------------------------|---------------------------------------------------------------------------|-------------------------------------------------|----------------------------------------|----------|--------------|
| LP          | 1         | chr1 | 100316614 | CAG | C   | <i>AGL</i> | AR          | c.18_19delG<br>A                                                                         | p.Gln6fs                                                                  | 1p21.2                                          | frameshift_ variant                    | HIGH     | 0.01%        |
| LP          | 1         | chr1 | 100366273 | C   | A   | <i>AGL</i> | AR          | c.3444C>A;<br>c.3396C>A                                                                  | p.Tyr1148*;p.<br>Tyr1132*;p.Ty<br>r1132*;p.Tyr1<br>131*                   | 1p21.2                                          | stop_gaine<br>d                        | HIGH     | 0.00%        |
| P           | 1         | chr1 | 241675301 | G   | C   | <i>FH</i>  | AD/AR       | c.521C>G                                                                                 |                                                                           | 1q43                                            | structural_i<br>nteraction_<br>variant | HIGH     | 0.05%        |
| P           | 1         | chr1 | 241671943 | C   | T   | <i>FH</i>  | AD/AR       | c.698G>A                                                                                 |                                                                           | 1q43                                            | structural_i<br>nteraction_<br>variant | HIGH     | 0.02%        |
| LP          | 1         | chr1 | 155208361 | C   | G   | <i>GBA</i> | AR          | c.535G>Cc.<br>388G>C;c.1<br>96G>C;c.27<br>4G>C                                           | p.Asp179His;p<br>.Asp179His;p.<br>Asp130His;p.<br>Asp66His;p.A<br>sp92His | 1q22                                            | missense_v<br>ariant                   | MODERATE | 0.02%        |
| P           | 1         | chr1 | 155210420 | C   | T   | <i>GBA</i> | AR          | c.115+1G><br>An.234+1G<br>>A;n.453+1<br>G>A;n.436+<br>1G>A;n.420<br>+1G>A;n.24<br>6+1G>A | 1q22                                                                      | splice_don<br>or_variant<br>&intron_va<br>riant | HIGH                                   | 0.10%    |              |
| P           | 1         | chr1 | 43804234  | CCT | C   | <i>MPL</i> | AD/AR       | c.235_236de<br>ICT                                                                       | p.Leu79fs                                                                 | 1p34.2                                          | frameshift_<br>variant                 | HIGH     | 0.01%        |
| LP          | 1         | chr1 | 43814627  | G   | A   | <i>MPL</i> | AD/AR       | c.1422G>A                                                                                | p.Trp474*                                                                 | 1p34.2                                          | stop_gaine<br>d                        | HIGH     | 0.00%        |
| P           | 2         | chr1 | 43804305  | G   | C   | <i>MPL</i> | AD/AR       | c.305G>C                                                                                 | p.Arg102Pro                                                               | 1p34.2                                          | missense_v<br>ariant                   | MODERATE | 0.10%        |
| P           | 1         | chr1 | 43804396  | G   | C   | <i>MPL</i> | AD/AR       | c.391+5G>C                                                                               |                                                                           | 1p34.2                                          | splice_regi<br>on_variant              | LOW      | 0.03%        |

|   |   |      |          |    |   |              |    |                                                                                                                                    |                                                                                                                                                                       |        |                    |          |       |
|---|---|------|----------|----|---|--------------|----|------------------------------------------------------------------------------------------------------------------------------------|-----------------------------------------------------------------------------------------------------------------------------------------------------------------------|--------|--------------------|----------|-------|
|   |   |      |          |    |   |              |    |                                                                                                                                    |                                                                                                                                                                       |        | &intron_variant    |          |       |
| P | 1 | chr1 | 45798117 | C  | T | <i>MUTYH</i> | AR | c.734G>A;c.650G>A;c.683G>A;c.650G>A;c.653G>A;c.650G>A;c.725G>A;c.695G>A;c.692G>A;c.683G>A;c.44G>A;c.692G>A;c.266G>A;c.683G>A       | p.Arg245His;p.Arg217His;p.Arg228His;p.Arg217His;p.Arg218His;p.Arg217His;p.Arg242His;p.Arg232His;p.Arg231His;p.Arg228His;p.Arg15His;p.Arg231His;p.Arg89His;p.Arg228His | 1p34.1 | missense_variant   | MODERATE | 0.15% |
| P | 1 | chr1 | 45797371 | AG | A | <i>MUTYH</i> | AR | c.1147delC;c.1063delC;c.1096delC;c.1063delC;c.1066delC;c.1063delC;c.1138delC;c.1108delC;c.1105delC;c.1096delC;c.480delC;c.1105delC | p.Ala385fs;p.Ala357fs;p.Ala368fs;p.Ala357fs;p.Ala358fs;p.Ala357fs;p.Ala382fs;p.Ala372fs;p.Ala371fs;p.Ala368fs;p.Leu161fs;p.Ala371fs                                   | 1p34.1 | frameshift_variant | HIGH     | 0.12% |
| P | 1 | chr1 | 45798627 | C  | T | <i>MUTYH</i> | AR | c.467G>A;c.383G>A;c.416G>A;c.383G>A;c.386G>A;c.383G>A;c.458G>A;c.428G>A;c.425G>A;c.416G>A;c.                                       | p.Trp156*;p.Trp128*;p.Trp139*;p.Trp128*;p.Trp129*;p.Trp128*;p.Trp153*;p.Trp143*;p.Trp142*;p.Trp139*;p.Trp142*;p.Trp139*                                               | 1p34.1 | stop_gained        | HIGH     | 0.06% |

|    |   |      |           |          |   |              |    |                                                                                                                                                                                                                                                                                     |                                                                                                                                                                                    |        |                             |          |       |
|----|---|------|-----------|----------|---|--------------|----|-------------------------------------------------------------------------------------------------------------------------------------------------------------------------------------------------------------------------------------------------------------------------------------|------------------------------------------------------------------------------------------------------------------------------------------------------------------------------------|--------|-----------------------------|----------|-------|
|    |   |      |           |          |   |              |    | 425G>A;c.416G>A                                                                                                                                                                                                                                                                     |                                                                                                                                                                                    |        |                             |          |       |
| P  | 1 | chr1 | 45796890  | TTC<br>C | T | <i>MUTYH</i> | AR | c.1437_1439delGGA;c.480_482delGGA;c.438_440delGGA;c.48_50delGGA;c.1353_1355delGGA;c.1386_1388delGGA;c.1353_1355delGGA;c.1356_1358delGGA;c.1353_1355delGGA;c.1428_1430delGGA;c.1398_1400delGGA;c.1395_1397delGGA;c.438_440delGGA;c.1386_1388delGGA;c.426_428delGGA;c.1395_1397delGGA | p.Glu480del;p.Glu161del;p.Glu147del;p.Glu17del;p.Glu452del;p.Glu463del;p.Glu452del;p.Glu453del;p.Glu452del;p.Glu477del;p.Glu467del;p.Glu466del;p.Glu147del;p.Glu463del;p.Glu466del | 1p34.1 | disruptive_inframe_deletion | MODERATE | 0.02% |
| LP | 1 | chr1 | 156838007 | AG       | A | <i>NTRK1</i> | AR | c.543delG;c.453delG;c.453delG;c.543delG                                                                                                                                                                                                                                             | p.Leu183fs;p.Leu153fs;p.Leu153fs;p.Leu183fs;p.Leu183fs                                                                                                                             | 1q23.1 | frameshift_variant          | HIGH     | 0.00% |
| LP | 1 | chr1 | 93301840  | G        | A | <i>RPL5</i>  | AD | c.418G>A;c.268G>A                                                                                                                                                                                                                                                                   | p.Gly140Ser;p.Gly90Ser                                                                                                                                                             | 1p22.1 | missense_variant            | MODERATE | 0.03% |



|    |   |      |           |          |    |               |     |                                                                                                                 |                                                                                                                                                                  |                                                  |                                                                                                           |          |       |
|----|---|------|-----------|----------|----|---------------|-----|-----------------------------------------------------------------------------------------------------------------|------------------------------------------------------------------------------------------------------------------------------------------------------------------|--------------------------------------------------|-----------------------------------------------------------------------------------------------------------|----------|-------|
| LP | 2 | chr2 | 169828535 | C        | T  | <i>ABCB11</i> | AR  | c.1460G>A;<br>c.8G>A                                                                                            | p.Arg487His;p<br>.Arg3His                                                                                                                                        | 2q31.1                                           | missense_v<br>ariant                                                                                      | MODERATE | 0.14% |
| P  | 1 | chr2 | 169825008 | A        | C  | <i>ABCB11</i> | AR  | c.2012-<br>8T>G;c.*48<br>2-8T>G                                                                                 | 2q31.1                                                                                                                                                           | splice_regi<br>on_variant<br>&intron_va<br>riant | LOW                                                                                                       | 0.01%    |       |
| LP | 1 | chr2 | 233208190 | C        | T  | <i>DIS3L2</i> | AR  | c.1717C>T                                                                                                       | p.Arg573*                                                                                                                                                        | 2q37.1                                           | stop_gaine<br>d                                                                                           | HIGH     | 0.00% |
| LP | 1 | chr2 | 233208193 | CTG      | C  | <i>DIS3L2</i> | AR  | c.1722_1723<br>delGT                                                                                            | p.Phe576fs                                                                                                                                                       | 2q37.1                                           | frameshift_<br>variant                                                                                    | HIGH     | 0.00% |
| LP | 1 | chr2 | 233200919 | AAC      | A  | <i>DIS3L2</i> | AR  | c.161_162de<br>lCA;c.*2837<br>-3_*2837-<br>2delCA                                                               | p.Thr54fs;                                                                                                                                                       | 2q37.1                                           | frameshift_<br>variant;spli<br>ce_cepto<br>r_variant&<br>splice_regi<br>on_variant<br>&intron_va<br>riant | HIGH     | 0.00% |
| LP | 1 | chr2 | 233201091 | AG       | A  | <i>DIS3L2</i> | AR  | c.253delG                                                                                                       | p.Val85fs                                                                                                                                                        | 2q37.1                                           | frameshift_<br>variant                                                                                    | HIGH     | 0.08% |
| LP | 1 | chr2 | 128030505 | T        | TC | <i>ERCC3</i>  | AR  | c.1762dupG;<br>c.1570dupG                                                                                       | p.Glu588fs;p.<br>Glu524fs                                                                                                                                        | 2q14.3                                           | frameshift_<br>variant                                                                                    | HIGH     | 0.01% |
| LP | 1 | chr2 | 128050332 | G        | A  | <i>ERCC3</i>  | AR  | c.325C>T;c.<br>133C>T                                                                                           | p.Arg109*;p.A<br>rg45*                                                                                                                                           | 2q14.3                                           | stop_gaine<br>d                                                                                           | HIGH     | 0.08% |
| LP | 1 | chr2 | 58388667  | CAT<br>A | C  | <i>FANCL</i>  | AR  | c.1022_1024<br>delTAT;c.92<br>3_925delTA<br>T;c.1007_10<br>09delTAT;c.<br>656_658del<br>TAT;c.830_<br>832delTAT | p.Ile341_Cys3<br>42delinsSer;p.I<br>le308_Cys309<br>delinsSer;p.Ile<br>336_Cys337de<br>linsSer;p.Ile21<br>9_Cys220delin<br>sSer;p.Ile277_<br>Cys278delinsS<br>er | 2p16.1                                           | disruptive_<br>inframe_de<br>letion                                                                       | MODERATE | 0.07% |
| LP | 1 | chr2 | 209108190 | T        | C  | <i>IDH1</i>   | UNK | c.659A>G                                                                                                        |                                                                                                                                                                  | 2q34                                             | structural_i<br>nteraction_<br>variant                                                                    | HIGH     | 0.08% |

|    |   |      |           |   |    |               |       |                                                                               |                                                                                          |         |                                        |          |       |
|----|---|------|-----------|---|----|---------------|-------|-------------------------------------------------------------------------------|------------------------------------------------------------------------------------------|---------|----------------------------------------|----------|-------|
| LP | 1 | chr2 | 209116175 | T | C  | <i>IDH1</i>   | UNK   | c.101A>G                                                                      |                                                                                          | 2q34    | structural_interaction_variant         | HIGH     | 0.00% |
| LP | 2 | chr2 | 47637301  | T | G  | <i>MSH2</i>   | AD/AR | c.435T>G                                                                      |                                                                                          | 2p21    | structural_interaction_variant         | HIGH     | 0.10% |
| LP | 1 | chr2 | 47643513  | C | G  | <i>MSH2</i>   | AD/AR | c.1021C>G;<br>c.823C>G                                                        | p.Leu341Val;p.<br>Leu275Val;p.<br>Leu341Val                                              | 2p21    | missense_variant                       | MODERATE | 0.00% |
| LP | 1 | chr2 | 47643537  | C | G  | <i>MSH2</i>   | AD/AR | c.1045C>G                                                                     |                                                                                          | 2p21    | structural_interaction_variant         | HIGH     | 0.04% |
| LP | 1 | chr2 | 48026818  | G | A  | <i>MSH6</i>   | AD/AR | c.1696G>A;<br>c.1306G>A;<br>c.790G>A                                          | p.Gly566Arg;p.<br>Gly436Arg;p.<br>Gly264Arg                                              | 2p16.3  | missense_variant                       | MODERATE | 0.24% |
| LP | 1 | chr2 | 190728500 | C | T  | <i>PMS1</i>   | AD    | c.1888C>T;<br>c.1360C>T;<br>c.1771C>T;<br>c.1360C>T;<br>c.1705C>T;<br>c.52C>T | p.Arg630*;p.A<br>rg454*;p.Arg5<br>91*;p.Arg591*<br>;p.Arg454*;p.<br>Arg569*;p.Ar<br>g18* | 2q32.2  | stop_gained                            | HIGH     | 0.02% |
| LP | 1 | chr2 | 3627860   | C | T  | <i>RPS7</i>   | AD    | c.517C>T                                                                      | p.Gln173*                                                                                | 2p25.3  | stop_gained                            | HIGH     | 0.00% |
| LP | 1 | chr2 | 39216456  | C | T  | <i>SOS1</i>   | AD    | c.3347-<br>1G>A                                                               |                                                                                          | 2p22.1  | splice_acceptor_variant&intron_variant | HIGH     | 0.14% |
| LP | 1 | chr2 | 39239306  | A | G  | <i>SOS1</i>   | AD    | c.2351T>C                                                                     | p.Ile784Thr;p.I<br>le784Thr;p.Ile<br>784Thr                                              | 2p22.1  | missense_variant                       | MODERATE | 0.00% |
| P  | 1 | chr3 | 48611297  | A | AG | <i>COL7A1</i> | AD/AR | c.6527dupC;<br>c.6431dupC                                                     | p.Gly2177fs;p.<br>Gly2145fs                                                              | 3p21.31 | frameshift_variant                     | HIGH     | 0.04% |
| LP | 1 | chr3 | 48622467  | A | T  | <i>COL7A1</i> | AD/AR | c.3975+2T><br>A                                                               |                                                                                          | 3p21.31 | splice_donor_variant&intron_variant    | HIGH     | 0.01% |
| LP | 1 | chr3 | 48613168  | C | T  | <i>COL7A1</i> | AD/AR | c.5870G>A;<br>c.5774G>A                                                       | p.Arg1957Gln;<br>p.Arg1925Gln                                                            | 3p21.31 | missense_variant                       | MODERATE | 0.00% |

|    |   |      |          |                         |   |               |       |                                                                                                                                                                                                   |                                                                              |                                                                                                                                     |                      |          |       |
|----|---|------|----------|-------------------------|---|---------------|-------|---------------------------------------------------------------------------------------------------------------------------------------------------------------------------------------------------|------------------------------------------------------------------------------|-------------------------------------------------------------------------------------------------------------------------------------|----------------------|----------|-------|
| LP | 1 | chr3 | 48631927 | G                       | A | <i>COL7A1</i> | AD/AR | c.140C>T                                                                                                                                                                                          | p.Ser47Leu                                                                   | 3p21.31                                                                                                                             | missense_v<br>ariant | MODERATE | 0.00% |
| LP | 1 | chr3 | 48601943 | GAG<br>GCT<br>ACA<br>AC | G | <i>COL7A1</i> | AD/AR | n.211-<br>7_213delGT<br>TGTAGCC<br>T                                                                                                                                                              | 3p21.31                                                                      | splice_acce<br>ptor_varian<br>t&splice_re<br>gion_varia<br>nt&intron_<br>variant&no<br>n_coding_t<br>ranscript_e<br>xon_varian<br>t | HIGH                 | 0.00%    |       |
| P  | 1 | chr3 | 10135009 | T                       | G | <i>FANCD2</i> | AR    | c.3888+2T><br>G;c.*44+2T<br>>G                                                                                                                                                                    | 3p25.3                                                                       | splice_don<br>or_variant<br>&intron_va<br>riant                                                                                     | HIGH                 | 0.00%    |       |
| P  | 2 | chr3 | 10108951 | G                       | A | <i>FANCD2</i> | AR    | c.2444G>A;<br>c.941G>A                                                                                                                                                                            | p.Arg815Gln;p.<br>.Arg815Gln;p.<br>Arg815Gln;p.<br>Arg815Gln;p.<br>Arg314Gln | 3p25.3                                                                                                                              | missense_v<br>ariant | MODERATE | 0.11% |
| P  | 1 | chr3 | 37038201 | G                       | A | <i>MLH1</i>   | AD/AR | c.207+1G><br>A;c.*85+1G<br>>A;c.*287+<br>1G>A;c.*85<br>+1G>A;c.18<br>0+1G>A;c.-<br>662+1G>A;<br>n.329+1G><br>A;c.-<br>425+1G>A;<br>c.-<br>517+1G>A;<br>c.-<br>425+1G>A;<br>c.-<br>83+1G>A;c.<br>- | 3p22.2                                                                       | splice_don<br>or_variant<br>&intron_va<br>riant                                                                                     | HIGH                 | 0.00%    |       |

|    |   |      |           |   |   |               |       |                                                      |                                                                                                                                     |        |                                     |          |       |
|----|---|------|-----------|---|---|---------------|-------|------------------------------------------------------|-------------------------------------------------------------------------------------------------------------------------------------|--------|-------------------------------------|----------|-------|
|    |   |      |           |   |   |               |       | 83+1G>A;n.230+1G>A;n.134+1G>A;c.-517+1G>A;n.211+1G>A |                                                                                                                                     |        |                                     |          |       |
| LP | 1 | chr3 | 37059011  | T | A | <i>MLH1</i>   | AD/AR | c.805T>A;c.778T>A;c.82T>A;c.511T>A;c.82T>A;c.145T>A  | p.Ser269Thr;p.Ser260Thr;p.Ser28Thr;p.Ser28Thr;p.Ser28Thr;p.Ser28Thr;p.Ser171Thr;p.Ser28Thr;p.Ser49Thr                               | 3p22.2 | missense_variant                    | MODERATE | 0.00% |
| LP | 1 | chr3 | 12632325  | T | C | <i>RAF1</i>   | AD    | c.1402A>G;c.1342A>G;c.697A>G;c.979A>G;c.1099A>G      | p.Ile468Val;p.Ile448Val;p.Ile233Val;p.Ile327Val;p.Ile367Val                                                                         | 3p25.2 | missense_variant                    | MODERATE | 0.04% |
| LP | 1 | chr3 | 197680532 | G | A | <i>RPL35A</i> | AD    | c.*163+1G>A                                          |                                                                                                                                     | 3q29   | splice_donor_variant&intron_variant | HIGH     | 0.00% |
| LP | 1 | chr3 | 189584569 | C | T | <i>TP63</i>   | AD    | c.865C>T;c.610C>T;c.583C>T;c.328C>T                  | p.Pro289Ser;p.Pro204Ser;p.Pro289Ser;p.Pro289Ser;p.Pro289Ser;p.Pro195Ser;p.Pro195Ser;p.Pro195Ser;p.Pro195Ser;p.Pro110Ser;p.Pro195Ser | 3q28   | missense_variant                    | MODERATE | 0.00% |
| LP | 1 | chr3 | 189585649 | T | C | <i>TP63</i>   | AD    | c.910T>C;c.655T>C;c.6                                | p.Tyr304His;p.Tyr219His;p.Tyr304His;p.Ty                                                                                            | 3q28   | missense_variant                    | MODERATE | 0.00% |

|    |   |      |           |     |   |             |       |                                   |                                                                                                         |        |                                |      |       |
|----|---|------|-----------|-----|---|-------------|-------|-----------------------------------|---------------------------------------------------------------------------------------------------------|--------|--------------------------------|------|-------|
|    |   |      |           |     |   |             |       | 28T>C;c.373T>C                    | r304His;p.Tyr304His;p.Tyr304His;p.Tyr210His;p.Tyr210His;p.Tyr210His;p.Tyr210His;p.Tyr125His;p.Tyr210His |        |                                |      |       |
| LP | 2 | chr3 | 189612062 | G   | A | <i>TP63</i> | AD    | c.1814G>A                         |                                                                                                         | 3q28   | structural_interaction_variant | HIGH | 0.07% |
| LP | 2 | chr3 | 189455575 | C   | T | <i>TP63</i> | AD    | c.109C>T                          | p.Arg37*                                                                                                | 3q28   | stop_gain_d                    | HIGH | 0.02% |
| P  | 1 | chr3 | 10191605  | C   | T | <i>VHL</i>  | AD    | c.598C>T                          |                                                                                                         | 3p25.3 | structural_interaction_variant | HIGH | 0.06% |
| LP | 2 | chr3 | 10183722  | G   | T | <i>VHL</i>  | AD    | c.191G>T                          |                                                                                                         | 3p25.3 | structural_interaction_variant | HIGH | 0.00% |
| LP | 1 | chr3 | 10183534  | G   | T | <i>VHL</i>  | AD    | c.3G>T                            | p.Met1?                                                                                                 | 3p25.3 | start_lost                     | HIGH | 0.00% |
| P  | 1 | chr3 | 14199738  | GCA | G | <i>XPC</i>  | AR    | c.1643_1644delTG;c.1532_1533delTG | p.Val548fs;p.Val511fs                                                                                   | 3p25.1 | frameshift_variant             | HIGH | 0.00% |
| LP | 1 | chr5 | 112154970 | G   | A | <i>APC</i>  | AD    | c.1241G>A                         |                                                                                                         | 5q22.2 | structural_interaction_variant | HIGH | 0.02% |
| LP | 1 | chr5 | 112162920 | G   | C | <i>APC</i>  | AD    | c.1524G>C                         |                                                                                                         | 5q22.2 | structural_interaction_variant | HIGH | 0.00% |
| LP | 1 | chr5 | 112175750 | A   | G | <i>APC</i>  | AD    | c.4459A>G                         |                                                                                                         | 5q22.2 | protein_protein_contact        | HIGH | 0.00% |
| LP | 1 | chr5 | 79952308  | C   | T | <i>MSH3</i> | AR    | c.316C>T                          | p.Gln106*                                                                                               | 5q14.1 | stop_gain_d                    | HIGH | 0.00% |
| LP | 1 | chr5 | 177580563 | T   | A | <i>NHP2</i> | AD/AR | c.161-2A>T;n.228-2A>T             |                                                                                                         | 5q35.3 | splice_acceptor_varian         | HIGH | 0.00% |

|    |   |      |          |   |   |              |       |                                       |                                                                                                             |                      |                                                 |          |       |
|----|---|------|----------|---|---|--------------|-------|---------------------------------------|-------------------------------------------------------------------------------------------------------------|----------------------|-------------------------------------------------|----------|-------|
|    |   |      |          |   |   |              |       |                                       |                                                                                                             | t&intron_v<br>ariant |                                                 |          |       |
| P  | 1 | chr5 | 240511   | G | T | <i>SDHA</i>  | AD/AR | c.1471G>T;<br>c.1327G>T;<br>c.124G>T  | p.Glu491*;p.G<br>lu491*;p.Glu4<br>43*;p.Glu42*                                                              | 5p15.33              | stop_gaine<br>d                                 | HIGH     | 0.00% |
| LP | 1 | chr5 | 1279527  | G | A | <i>TERT</i>  | AD/AR | c.2009C>T                             | p.Ala670Val                                                                                                 | 5p15.33              | missense_v<br>ariant                            | MODERATE | 0.00% |
| LP | 1 | chr5 | 1280427  | C | T | <i>TERT</i>  | AD/AR | c.1796G>A                             | p.Arg599Gln                                                                                                 | 5p15.33              | missense_v<br>ariant                            | MODERATE | 0.01% |
| LP | 1 | chr5 | 1294106  | C | T | <i>TERT</i>  | AD/AR | c.895G>A                              | p.Val299Met                                                                                                 | 5p15.33              | missense_v<br>ariant                            | MODERATE | 0.14% |
| P  | 1 | chr6 | 35423696 | C | T | <i>FANCE</i> | AR    | c.421C>T                              | p.Arg141*                                                                                                   | 6p21.31              | stop_gaine<br>d                                 | HIGH     | 0.00% |
| P  | 1 | chr6 | 35423630 | C | T | <i>FANCE</i> | AR    | c.355C>T                              | p.Gln119*                                                                                                   | 6p21.31              | stop_gaine<br>d                                 | HIGH     | 0.00% |
| LP | 1 | chr6 | 26092870 | G | A | <i>HFE</i>   | AR    | c.649+1G><br>A                        |                                                                                                             | 6p22.2               | splice_don<br>or_variant<br>&intron_va<br>riant | HIGH     | 0.00% |
| LP | 1 | chr7 | 55220349 | G | T | <i>EGFR</i>  | AD    | c.739G>T;c.<br>604G>T;c.5<br>80G>T    | p.Asp247Tyr;p<br>.Asp202Tyr;p.<br>Asp247Tyr;p.<br>Asp247Tyr;p.<br>Asp247Tyr;p.<br>Asp247Tyr;p.<br>Asp194Tyr | 7p11.2               | missense_v<br>ariant                            | MODERATE | 0.00% |
| LP | 1 | chr7 | 55266472 | G | A | <i>EGFR</i>  | AD    | c.2764G>A;<br>c.2629G>A;<br>c.2605G>A | p.Glu922Lys;p<br>.Glu877Lys;p.<br>Glu869Lys                                                                 | 7p11.2               | missense_v<br>ariant                            | MODERATE | 0.00% |
| LP | 1 | chr7 | 55260490 | T | C | <i>EGFR</i>  | AD    | c.2657T>C;<br>c.2522T>C;<br>c.2498T>C | p.Ile886Thr;p.I<br>le841Thr;p.Ile<br>833Thr                                                                 | 7p11.2               | missense_v<br>ariant                            | MODERATE | 0.00% |
| LP | 1 | chr7 | 55266550 | G | A | <i>EGFR</i>  | AD    | c.2842G>A;<br>c.2707G>A;<br>c.2683G>A | p.Val948Ile;p.<br>Val903Ile;p.V<br>al895Ile                                                                 | 7p11.2               | missense_v<br>ariant                            | MODERATE | 0.08% |
| LP | 1 | chr7 | 55268045 | G | A | <i>EGFR</i>  | AD    | c.2885G>A                             |                                                                                                             | 7p11.2               | structural_i<br>nteraction_<br>variant          | HIGH     | 0.20% |

|    |   |      |           |     |   |             |       |                                                                                    |                                                                                                              |         |                                                    |          |       |
|----|---|------|-----------|-----|---|-------------|-------|------------------------------------------------------------------------------------|--------------------------------------------------------------------------------------------------------------|---------|----------------------------------------------------|----------|-------|
| LP | 1 | chr7 | 148511116 | C   | T | <i>EZH2</i> | AD    | c.1786G>A;<br>c.1618G>A;<br>c.1771G>A;<br>c.1654G>A;<br>c.1744G>A                  | p.Ala596Thr;p.<br>.Ala540Thr;p.<br>Ala591Thr;p.<br>Ala552Thr;p.<br>Ala540Thr;p.<br>Ala540Thr;p.<br>Ala582Thr | 7q36.1  | missense_v<br>ariant                               | MODERATE | 0.05% |
| LP | 1 | chr7 | 148508755 | C   | T | <i>EZH2</i> | AD    | c.1894G>A                                                                          |                                                                                                              | 7q36.1  | structural_i<br>nteraction_<br>variant             | HIGH     | 0.00% |
| LP | 1 | chr7 | 116398601 | C   | T | <i>MET</i>  | AD    | c.2191C>T;<br>c.31C>T                                                              | p.Arg731*;p.A<br>rg731*;p.Arg7<br>31*;p.Arg11*                                                               | 7q31.2  | stop_gaine<br>d                                    | HIGH     | 0.00% |
| LP | 1 | chr7 | 6022534   | C   | G | <i>PMS2</i> | AD/AR | c.2095G>C;<br>c.1777G>C;<br>c.892G>C                                               | p.Asp699His;p<br>.Asp593His;p.<br>Asp298His                                                                  | 7p22.1  | missense_v<br>ariant                               | MODERATE | 0.00% |
| P  | 1 | chr7 | 6022511   | CT  | C | <i>PMS2</i> | AD/AR | c.2117delA;<br>c.1799delA;<br>c.914delA                                            | p.Lys706fs;p.L<br>ys600fs;p.Lys<br>305fs                                                                     | 7p22.1  | frameshift_<br>variant                             | HIGH     | 0.00% |
| LP | 1 | chr7 | 124532320 | C   | A | <i>POT1</i> | AD/AR | c.124G>T                                                                           | p.Asp42Tyr                                                                                                   | 7q31.33 | missense_v<br>ariant&spli<br>ce_region_<br>variant | MODERATE | 0.00% |
| LP | 1 | chr7 | 124482897 | T   | C | <i>POT1</i> | AD/AR | c.1127A>G;<br>c.734A>G                                                             | p.Gln376Arg;p<br>.Gln245Arg;p.<br>Gln376Arg;p.<br>Gln376Arg                                                  | 7q31.33 | missense_v<br>ariant                               | MODERATE | 0.10% |
| LP | 1 | chr7 | 124511015 | G   | A | <i>POT1</i> | AD/AR | c.205C>T                                                                           | p.Leu69Phe                                                                                                   | 7q31.33 | missense_v<br>ariant                               | MODERATE | 0.00% |
| LP | 2 | chr7 | 124499043 | C   | T | <i>POT1</i> | AD/AR | c.670G>A                                                                           |                                                                                                              | 7q31.33 | structural_i<br>nteraction_<br>variant             | HIGH     | 0.01% |
| P  | 1 | chr7 | 124464068 | TTA | T | <i>POT1</i> | AD/AR | c.1851_1852<br>delTA;c.201<br>_202delTA;<br>c.1458_1459<br>delTA;c.345<br>346delTA | p.Asp617fs;p.<br>Asp67fs;p.Asp<br>486fs;p.Asp11<br>5fs                                                       | 7q31.33 | frameshift_<br>variant                             | HIGH     | 0.02% |

|    |   |      |           |    |   |                 |    |                                              |                                    |                                         |                    |          |       |
|----|---|------|-----------|----|---|-----------------|----|----------------------------------------------|------------------------------------|-----------------------------------------|--------------------|----------|-------|
| LP | 1 | chr7 | 92735355  | A  | T | <i>SAMD9</i>    | AD | c.56T>A                                      | p.Val19Glu;p.Val19Glu              | 7q21.2                                  | missense_variant   | MODERATE | 0.00% |
| P  | 2 | chr7 | 66459273  | T  | A | <i>SBDS</i>     | AR | c.184A>T                                     | p.Lys62*;p.Lys62*                  | 7q11.21                                 | stop_gained        | HIGH     | 0.14% |
| P  | 1 | chr7 | 95813688  | G  | A | <i>SLC25A13</i> | AR | c.1081C>T;<br>c.1078C>T;<br>c.754C>T         | p.Arg361*;p.Arg360*;p.Arg252*      | 7q21.3                                  | stop_gained        | HIGH     | 0.01% |
| LP | 1 | chr7 | 128845209 | G  | T | <i>SMO</i>      | AD | c.703G>T                                     | p.Ala235Ser                        | 7q32.1                                  | missense_variant   | MODERATE | 0.00% |
| LP | 1 | chr7 | 128846049 | G  | A | <i>SMO</i>      | AD | c.979G>A;c.61G>A                             | p.Ala327Thr;p.Ala21Thr             | 7q32.1                                  | missense_variant   | MODERATE | 0.01% |
| LP | 1 | chr7 | 128843230 | C  | T | <i>SMO</i>      | AD | c.337C>T                                     | p.Arg113Trp                        | 7q32.1                                  | missense_variant   | MODERATE | 0.00% |
| LP | 2 | chr7 | 128843386 | G  | C | <i>SMO</i>      | AD | c.493G>C                                     | p.Asp165His                        | 7q32.1                                  | missense_variant   | MODERATE | 0.00% |
| LP | 1 | chr7 | 128846127 | C  | G | <i>SMO</i>      | AD | c.1057C>G;<br>c.139C>G                       | p.Leu353Val;p.Leu47Val             | 7q32.1                                  | missense_variant   | MODERATE | 0.00% |
| P  | 1 | chr8 | 90955582  | C  | A | <i>NBN</i>      | AR | c.2083G>T;<br>c.1837G>T                      | p.Gly695*;p.Gly613*                | 8q21.3                                  | stop_gained        | HIGH     | 0.00% |
| P  | 1 | chr8 | 90967765  | TG | T | <i>NBN</i>      | AR | c.1142delC;<br>c.896delC                     | p.Pro381fs;p.Pro299fs              | 8q21.3                                  | frameshift_variant | HIGH     | 0.00% |
| LP | 1 | chr8 | 90955480  | C  | A | <i>NBN</i>      | AR | c.2184+1G>T;<br>c.*2057+1G>T;<br>c.1938+1G>T | 8q21.3                             | splice_donor_variant<br>&intron_variant | HIGH               | 0.00%    |       |
| LP | 1 | chr8 | 145738323 | G  | A | <i>RECQL4</i>   | AR | c.2662C>T;<br>c.832C>T                       | p.Gln888*;p.Gln278*                | 8q24.3                                  | stop_gained        | HIGH     | 0.00% |
| P  | 1 | chr8 | 145738509 | G  | A | <i>RECQL4</i>   | AR | c.2476C>T;<br>c.646C>T                       | p.Arg826*;p.Arg216*                | 8q24.3                                  | stop_gained        | HIGH     | 0.02% |
| P  | 2 | chr8 | 145740366 | CA | C | <i>RECQL4</i>   | AR | c.1573delT;<br>c.427delT                     | p.Cys525fs;p.Cys143fs              | 8q24.3                                  | frameshift_variant | HIGH     | 0.04% |
| LP | 1 | chr8 | 145739833 | A  | G | <i>RECQL4</i>   | AR | c.1697T>C;<br>c.65T>C;c.551T>C               | p.Leu566Pro;p.Leu22Pro;p.Leu184Pro | 8q24.3                                  | missense_variant   | MODERATE | 0.10% |
| LP | 3 | chr8 | 145742480 | G  | A | <i>RECQL4</i>   | AR | c.308C>T;c.179C>T                            | p.Pro103Leu;p.Pro60Leu             | 8q24.3                                  | missense_variant   | MODERATE | 0.10% |



|    |   |      |          |     |   |               |    |                                                                                                                                                     |                                                                                                                                                                                    |        |                                        |          |       |
|----|---|------|----------|-----|---|---------------|----|-----------------------------------------------------------------------------------------------------------------------------------------------------|------------------------------------------------------------------------------------------------------------------------------------------------------------------------------------|--------|----------------------------------------|----------|-------|
| LP | 2 | chr8 | 30954294 | C   | T | <i>WRN</i>    | AR | c.1909C>T                                                                                                                                           | p.Arg637Trp                                                                                                                                                                        | 8p12   | missense_v<br>ariant                   | MODERATE | 0.14% |
| LP | 1 | chr8 | 31024680 | TC  | T | <i>WRN</i>    | AR | c.4128delC                                                                                                                                          | p.Gly1377fs                                                                                                                                                                        | 8p12   | frameshift_<br>variant                 | HIGH     | 0.00% |
| LP | 1 | chr8 | 30977902 | TCA | T | <i>WRN</i>    | AR | c.2594_2595<br>delAC                                                                                                                                | p.His865fs                                                                                                                                                                         | 8p12   | frameshift_<br>variant                 | HIGH     | 0     |
| LP | 1 | chr8 | 30922443 | G   | A | <i>WRN</i>    | AR | c.368G>A                                                                                                                                            |                                                                                                                                                                                    | 8p12   | structural_i<br>nteraction_<br>variant | HIGH     | 0.00% |
| LP | 3 | chr9 | 21970985 | C   | G | <i>CDKN2A</i> | AD | c.373G>C;c.<br>373G>C;c.2<br>20G>C;c.37<br>3G>C;c.220<br>G>C;c.220G<br>>C;c.373G><br>C;c.220G>C<br>;c.220G>C                                        | p.Asp125His;p<br>.Asp125His;p.<br>Asp74His;p.A<br>sp125His;p.As<br>p74His;p.Asp7<br>4His;p.Asp125<br>His;p.Asp74Hi<br>s;p.Asp74His                                                 | 9p21.3 | missense_v<br>ariant                   | MODERATE | 0.10% |
| LP | 5 | chr9 | 21974681 | A   | G | <i>CDKN2A</i> | AD | c.146T>C                                                                                                                                            | p.Ile49Thr                                                                                                                                                                         | 9p21.3 | missense_v<br>ariant                   | MODERATE | 0.46% |
| P  | 1 | chr9 | 21971057 | C   | A | <i>CDKN2A</i> | AD | c.467G>T;c.<br>301G>T;c.3<br>44G>T;c.30<br>1G>T;c.148<br>G>T;c.344G<br>>T;c.301G><br>T;c.148G>T<br>;c.148G>T;c<br>.301G>T;c.1<br>48G>T;c.14<br>8G>T | p.Arg156Leu;<br>p.Gly101Trp;p<br>.Arg115Leu;p.<br>Gly101Trp;p.<br>Gly50Trp;p.Ar<br>g115Leu;p.Gly<br>101Trp;p.Gly5<br>0Trp;p.Gly50T<br>rp;p.Gly101Tr<br>p;p.Gly50Trp;<br>p.Gly50Trp | 9p21.3 | missense_v<br>ariant                   | MODERATE | 0.00% |
| LP | 1 | chr9 | 21970994 | C   | T | <i>CDKN2A</i> | AD | c.364G>A;c.<br>364G>A;c.2<br>11G>A;c.36<br>4G>A;c.211<br>G>A;c.211G<br>>A;c.364G><br>A;c.211G>A<br>;c.211G>A                                        | p.Gly122Ser;p.<br>Gly122Ser;p.G<br>ly71Ser;p.Gly<br>122Ser;p.Gly7<br>1Ser;p.Gly71S<br>er;p.Gly122Se<br>r;p.Gly71Ser;p<br>.Gly71Ser                                                 | 9p21.3 | missense_v<br>ariant                   | MODERATE | 0     |

|    |   |      |           |   |                                                           |                |    |                                                                   |                                                        |         |                                        |          |       |
|----|---|------|-----------|---|-----------------------------------------------------------|----------------|----|-------------------------------------------------------------------|--------------------------------------------------------|---------|----------------------------------------|----------|-------|
| LP | 1 | chr9 | 21974681  | A | C                                                         | <i>CDKN2A</i>  | AD | c.146T>G                                                          | p.Ile49Ser                                             | 9p21.3  | missense_variant                       | MODERATE | 0.00% |
| LP | 1 | chr9 | 21974794  | A | AG<br>GCT<br>CCA<br>TGC<br>TGC<br>TCC<br>CCG<br>CCG<br>CC | <i>CDKN2A</i>  | AD | c.9_32dupG<br>GCGGCGG<br>GGAGCAG<br>CATGGAG<br>CC                 | p.Pro11_Ser12<br>insAlaAlaGlySer<br>SerMetGluPro       | 9p21.3  | disruptive_inframe_insertion           | MODERATE | 0.00% |
| P  | 1 | chr9 | 271626    | G | T                                                         | <i>DOCK8</i>   | AR | c.54-1G>T;c.54-1G>T;c.*17-1G>T;c.-151-1G>T;n.163-1G>T;c.-151-1G>T |                                                        | 9p24.3  | splice_acceptor_variant&intron_variant | HIGH     | 0.04% |
| P  | 1 | chr9 | 97912338  | G | A                                                         | <i>FANCC</i>   | AR | c.553C>T                                                          | p.Arg185*                                              | 9q22.32 | stop_gained                            | HIGH     | 0.03% |
| LP | 1 | chr9 | 97888864  | C | G                                                         | <i>FANCC</i>   | AR | c.844-1G>C;c.844-1G>C;n.171-1G>C;n.29-1G>C;n.199-1G>C             |                                                        | 9q22.32 | splice_acceptor_variant&intron_variant | HIGH     | 0.00% |
| LP | 1 | chr9 | 35075080  | C | G                                                         | <i>FANCG</i>   | AR | c.1481-1G>C;c.*957-1G>C                                           |                                                        | 9p13.3  | splice_acceptor_variant&intron_variant | HIGH     | 0.00% |
| LP | 1 | chr9 | 101599363 | G | A                                                         | <i>GALNT12</i> | AD | c.1145G>A                                                         | p.Arg382His                                            | 9q22.33 | missense_variant                       | MODERATE | 0.00% |
| LP | 1 | chr9 | 98240450  | C | A                                                         | <i>PTCHI</i>   | AD | c.1234G>T;c.781G>T;c.781G>T;c.1036G>T;c.8                         | p.Ala412Ser;p.Ala261Ser;p.Ala261Ser;p.Ala346Ser;p.Ala2 | 9q22.32 | missense_variant                       | MODERATE | 0.02% |

|    |   |       |           |                        |    |                |       |                                                 |                                                       |                                     |                             |          |       |
|----|---|-------|-----------|------------------------|----|----------------|-------|-------------------------------------------------|-------------------------------------------------------|-------------------------------------|-----------------------------|----------|-------|
|    |   |       |           |                        |    |                |       | 71G>T;c.1036G>T;c.781G>T;c.1231G>T;c.385G>T     | 91Ser;p.Ala346Ser;p.Ala261Ser;p.Ala411Ser;p.Ala129Ser |                                     |                             |          |       |
| LP | 1 | chr9  | 98279098  | TC                     | T  | <i>PTCH1</i>   | AD    | c.4delG                                         | p.Glu2fs                                              | 9q22.32                             | frameshift_variant          | HIGH     | 0.01% |
| LP | 1 | chr9  | 2039717   | C                      | T  | <i>SMARCA2</i> | UNK   | c.607C>T                                        | p.Gln203*                                             | 9p24.3                              | stop_gained                 | HIGH     | 0.00% |
| LP | 1 | chr10 | 123239526 | C                      | T  | <i>FGFR2</i>   | AD    | c.981G>A                                        | p.Trp327*                                             | 10q26.13                            | stop_gained                 | HIGH     | 0.00% |
| P  | 1 | chr10 | 72360543  | G                      | T  | <i>PRF1</i>    | AR    | c.116C>A                                        | p.Pro39His                                            | 10q22.1                             | missense_variant            | MODERATE | 0.00% |
| LP | 1 | chr10 | 72360526  | C                      | T  | <i>PRF1</i>    | AR    | c.133G>A                                        | p.Gly45Arg                                            | 10q22.1                             | missense_variant            | MODERATE | 0.10% |
| LP | 2 | chr10 | 72358173  | G                      | A  | <i>PRF1</i>    | AR    | c.1304C>T                                       | p.Thr435Met                                           | 10q22.1                             | missense_variant            | MODERATE | 0.01% |
| LP | 1 | chr10 | 89692831  | T                      | A  | <i>PTEN</i>    | AD    | c.315T>A                                        | p.Cys105*                                             | 10q23.31                            | stop_gained                 | HIGH     | 0.00% |
| P  | 1 | chr11 | 108181032 | C                      | T  | <i>ATM</i>     | AD/AR | c.5908C>T                                       | p.Gln1970*                                            | 11q22.3                             | stop_gained                 | HIGH     | 0.00% |
| P  | 1 | chr11 | 108121752 | CAG                    | C  | <i>ATM</i>     | AD/AR | c.1564_1565delGA                                | p.Glu522fs                                            | 11q22.3                             | frameshift_variant          | HIGH     | 0.05% |
| LP | 1 | chr11 | 108202286 | T                      | C  | <i>ATM</i>     | AD/AR | c.7629+2T>C;c.7629+2T>C;n.3844+2T>C;n.3033+2T>C | 11q22.3                                               | splice_donor_variant&intron_variant | HIGH                        | 0.00%    |       |
| P  | 1 | chr11 | 108202611 | CTC<br>TAG<br>AAT<br>T | C  | <i>ATM</i>     | AD/AR | c.7638_7646delTAGAA<br>TTTC                     | p.Arg2547_Ser2549del                                  | 11q22.3                             | disruptive_inframe_deletion | MODERATE | 0.09% |
| P  | 1 | chr11 | 108236142 | C                      | CA | <i>ATM</i>     | AD/AR | c.9079dupA                                      | p.Ser3027fs                                           | 11q22.3                             | frameshift_variant          | HIGH     | 0.00% |
| P  | 1 | chr11 | 71146512  | C                      | T  | <i>DHCR7</i>   | AR    | c.1337G>A;<br>c.587G>A                          | p.Arg446Gln;p.Arg196Gln                               | 11q13.4                             | missense_variant            | MODERATE | 0.01% |

|    |   |       |           |   |   |               |       |                                              |                                                 |          |                                            |          |       |
|----|---|-------|-----------|---|---|---------------|-------|----------------------------------------------|-------------------------------------------------|----------|--------------------------------------------|----------|-------|
| LP | 1 | chr11 | 71148910  | C | T | <i>DHCR7</i>  | AR    | c.911G>A;c.266G>A;c.911G>A;c.161G>A;c.278G>A | p.Trp304*;p.Trp89*;p.Trp304*;p.Trp54*;p.Trp93*  | 11q13.4  | stop_gained                                | HIGH     | 0.00% |
| LP | 1 | chr11 | 71158655  | C | T | <i>DHCR7</i>  | AR    | c.-7+1G>A                                    |                                                 | 11q13.4  | splice_donor_variant&intron_variant        | HIGH     | 0.00% |
| LP | 1 | chr11 | 71155910  | C | G | <i>DHCR7</i>  | AR    | c.89G>C                                      | p.Gly30Ala                                      | 11q13.4  | missense_variant                           | MODERATE | 0.10% |
| LP | 2 | chr11 | 71146861  | C | T | <i>DHCR7</i>  | AR    | c.988G>A;c.238G>A                            | p.Val330Met;p.Val80Met                          | 11q13.4  | missense_variant                           | MODERATE | 0.14% |
| LP | 1 | chr11 | 44254000  | C | T | <i>EXT2</i>   | AD    | c.1859C>T;c.1760C>T                          | p.Thr620Met;p.Thr587Met                         | 11p11.2  | missense_variant                           | MODERATE | 0.13% |
| LP | 1 | chr11 | 118963136 | G | A | <i>HMBS</i>   | AD    | c.674G>A                                     |                                                 | 11q23.3  | structural_interaction_variant             | HIGH     | 0.05% |
| LP | 3 | chr11 | 64572021  | G | A | <i>MEN1</i>   | AD    | c.1633C>T;c.1453C>T;c.1513C>T                | p.Pro545Ser;p.Pro485Ser;p.Pro505Ser;p.Pro540Ser | 11q13.1  | missense_variant                           | MODERATE | 0.05% |
| LP | 1 | chr11 | 64575365  | G | A | <i>MEN1</i>   | AD    | c.652C>T                                     |                                                 | 11q13.1  | structural_interaction_variant             | HIGH     | 0.00% |
| P  | 1 | chr11 | 64572548  | C | A | <i>MEN1</i>   | AD    | c.1308G>T                                    |                                                 | 11q13.1  | structural_interaction_variant             | HIGH     | 0.00% |
| LP | 1 | chr11 | 94204810  | G | A | <i>MRE11A</i> | AD/AR | c.784C>T                                     | p.Gln262*;p.Gln259*                             | 11q21    | stop_gained                                | HIGH     | 0.00% |
| LP | 1 | chr12 | 121437161 | G | C | <i>HNF1A</i>  | AD    | c.1592G>C                                    | p.Ser531Thr                                     | 12q24.31 | missense_variant                           | MODERATE | 0.01% |
| LP | 1 | chr12 | 25368455  | G | A | <i>KRAS</i>   | AD    | c.490C>T                                     | p.Arg164*                                       | 12p12.1  | structural_interaction_variant;stop_gained | HIGH     | 0.03% |
| LP | 2 | chr12 | 133249340 | T | C | <i>POLE</i>   | AD/AR | c.1559A>G;c.1478A>G;                         | p.Gln520Arg;p.Gln493Arg;p.                      | 12q24.33 | missense_variant                           | MODERATE | 0.00% |

|    |   |       |           |                         |                 |              |       |                                                 |                                                       |          |                                    |          |       |
|----|---|-------|-----------|-------------------------|-----------------|--------------|-------|-------------------------------------------------|-------------------------------------------------------|----------|------------------------------------|----------|-------|
|    |   |       |           |                         |                 |              |       | c.899A>G;c.413A>G                               | Gln300Arg;p.Gln138Arg                                 |          |                                    |          |       |
| LP | 1 | chr12 | 133249420 | CA                      | C               | <i>POLE</i>  | AD/AR | c.1478delT;c.1397delT;c.818delT;c.332delT       | p.Leu493fs;p.Leu466fs;p.Leu273fs;p.Leu111fs           | 12q24.33 | frameshift_variant                 | HIGH     | 0.03% |
| LP | 1 | chr12 | 133245023 | AG                      | A               | <i>POLE</i>  | AD/AR | c.2091delC;c.2010delC;c.1431delC                | p.Leu698fs;p.Leu671fs;p.Leu478fs                      | 12q24.33 | frameshift_variant                 | HIGH     | 0.05% |
| LP | 1 | chr13 | 32936732  | G                       | C               | <i>BRCA2</i> | AD/AR | c.7878G>C;c.7878G>C                             | p.Trp2626Cys;p.Trp2626Cys                             | 13q13.1  | missense_variant                   | MODERATE | 0.00% |
| P  | 1 | chr13 | 32912623  | C                       | CTG<br>AG<br>GA | <i>BRCA2</i> | AD/AR | c.4131_4132insTGAGGA                            | p.Asn1377_Thr1378insTerGly;p.Asn1377_Thr1378insTerGly | 13q13.1  | stop_gained&conservative_insertion | HIGH     | 0.00% |
| P  | 1 | chr13 | 32953577  | C                       | T               | <i>BRCA2</i> | AD/AR | c.8878C>T                                       | p.Gln2960*                                            | 13q13.1  | stop_gained                        | HIGH     | 0.00% |
| P  | 1 | chr13 | 32954222  | C                       | T               | <i>BRCA2</i> | AD/AR | c.9196C>T;c.9196C>T;c.151C>T                    | p.Gln3066*;p.Gln3066*;p.Gln51*                        | 13q13.1  | stop_gained                        | HIGH     | 0.00% |
| P  | 1 | chr13 | 32913125  | CT                      | C               | <i>BRCA2</i> | AD/AR | c.4638delT                                      | p.Phe1546fs                                           | 13q13.1  | frameshift_variant                 | HIGH     | 0.00% |
| P  | 1 | chr13 | 32914437  | GT                      | G               | <i>BRCA2</i> | AD/AR | c.5946delT                                      | p.Ser1982fs                                           | 13q13.1  | frameshift_variant                 | HIGH     | 0.04% |
| P  | 2 | chr13 | 32913558  | C                       | CA              | <i>BRCA2</i> | AD/AR | c.5073dupA                                      | p.Trp1692fs                                           | 13q13.1  | frameshift_variant                 | HIGH     | 0.00% |
| P  | 1 | chr13 | 32954260  | CG                      | C               | <i>BRCA2</i> | AD/AR | c.9235delG;c.9235delG;c.190delG                 | p.Val3079fs;p.Val3079fs;p.Val64fs                     | 13q13.1  | frameshift_variant                 | HIGH     | 0.01% |
| LP | 1 | chr13 | 103527976 | AAT<br>CAT<br>CTG<br>AT | A               | <i>ERCC5</i> | AR    | c.3285_3294delATCATCTGAT;c.984_993delATCATCTGAT | p.Ser1096fs;p.Ser329fs                                | 13q33.1  | frameshift_variant                 | HIGH     | 0.00% |

|    |   |       |          |   |    |                      |       |                                                                                              |                                                                       |          |                                                        |          |       |
|----|---|-------|----------|---|----|----------------------|-------|----------------------------------------------------------------------------------------------|-----------------------------------------------------------------------|----------|--------------------------------------------------------|----------|-------|
| P  | 1 | chr13 | 49033844 | C | T  | <i>RBI</i>           | AD    | c.1981C>T                                                                                    |                                                                       | 13q14.2  | structural_i<br>nteraction_<br>variant                 | HIGH     | 0.08% |
| P  | 1 | chr13 | 48936995 | C | T  | <i>RBI</i>           | AD    | c.763C>T                                                                                     | p.Arg255*                                                             | 13q14.2  | stop_gaine<br>d                                        | HIGH     | 0.00% |
| LP | 1 | chr13 | 49039375 | G | A  | <i>RBI</i>           | AD    | c.2360G>A                                                                                    | p.Arg787Gln                                                           | 13q14.2  | missense_v<br>ariant                                   | MODERATE | 0.02% |
| LP | 1 | chr13 | 49039504 | G | A  | <i>RBI</i>           | AD    | c.2489G>A                                                                                    |                                                                       | 13q14.2  | protein_pro<br>tein_contac<br>t                        | HIGH     | 0.00% |
| LP | 1 | chr14 | 95562349 | G | GA | <i>DICER1</i>        | AD    | c.4907_4908<br>insT;c.941_<br>942insT                                                        | p.Ser1637fs;p.<br>Ser315fs                                            | 14q32.13 | frameshift_<br>variant                                 | HIGH     | 0     |
| LP | 1 | chr14 | 45618181 | C | T  | <i>FANCM</i>         | AD/AR | c.901C>T;c.<br>901C>T;c.8<br>23C>T                                                           | p.Gln301*;p.G<br>ln301*;p.Gln2<br>75*                                 | 14q21.2  | stop_gaine<br>d                                        | HIGH     | 0.00% |
| LP | 1 | chr14 | 45645406 | C | G  | <i>FANCM</i>         | AD/AR | c.3449C>G;<br>c.3371C>G;<br>c.1997C>G;<br>c.245C>G                                           | p.Ser1150*;p.<br>Ser1124*;p.Se<br>r666*;p.Ser82<br>*                  | 14q21.2  | stop_gaine<br>d                                        | HIGH     | 0.00% |
| LP | 2 | chr14 | 45667921 | C | T  | <i>FANCM</i>         | AD/AR | c.5791C>T;<br>c.5713C>T;<br>c.4339C>T;<br>c.2692C>T;<br>c.169C>T;c.<br>5791C>T;c.<br>5791C>T | p.Arg1931*;p.<br>Arg1905*;p.A<br>rg1447*;p.Arg<br>898*;p.Arg57*<br>;; | 14q21.2  | structural_i<br>nteraction_<br>variant;stop_<br>gained | HIGH     | 0.45% |
| P  | 1 | chr14 | 45636336 | C | T  | <i>FANCM</i>         | AD/AR | c.1972C>T;<br>c.1972C>T;<br>c.1894C>T;<br>c.520C>T                                           | p.Arg658*;p.A<br>rg658*;p.Arg6<br>32*;p.Arg174*                       | 14q21.2  | stop_gaine<br>d                                        | HIGH     | 0.10% |
| LP | 1 | chr14 | 94847286 | T | A  | <i>SERPIN<br/>A1</i> | AR    | c.839A>T                                                                                     | p.Asp280Val                                                           | 14q32.13 | missense_v<br>ariant                                   | MODERATE | 0.09% |
| LP | 2 | chr14 | 94849325 | C | T  | <i>SERPIN<br/>A1</i> | AR    | c.250G>A                                                                                     | p.Ala84Thr                                                            | 14q32.13 | missense_v<br>ariant                                   | MODERATE | 0.07% |
| LP | 1 | chr14 | 94849249 | G | A  | <i>SERPIN<br/>A1</i> | AR    | c.326C>T                                                                                     | p.Thr109Met                                                           | 14q32.13 | missense_v<br>ariant                                   | MODERATE | 0.10% |

|    |   |       |          |       |    |                 |       |                                                                   |                                                            |                                        |                                |          |       |
|----|---|-------|----------|-------|----|-----------------|-------|-------------------------------------------------------------------|------------------------------------------------------------|----------------------------------------|--------------------------------|----------|-------|
| P  | 1 | chr14 | 94844912 | T     | TA | <i>SERPINA1</i> | AR    | c.1130dupT                                                        | p.Leu377fs                                                 | 14q32.13                               | frameshift_variant             | HIGH     | 0.01% |
| LP | 1 | chr14 | 24709617 | CCACT | C  | <i>TINF2</i>    | AD/AR | c.1065_*3delAGTG;c.822_*3delAGTG;c.423_*3delAGTG                  | p.Ter355fs;p.Ter274fs;p.Ter141fs                           | 14q12                                  | frameshift_variant&stop_lost   | HIGH     | 0.05% |
| LP | 1 | chr15 | 40501902 | T     | G  | <i>BUB1B</i>    | AR    | c.2252T>G;c.2210T>G                                               | p.Leu751*;p.Leu737*                                        | 15q15.1                                | stop_gained                    | HIGH     | 0.01% |
| P  | 1 | chr15 | 80460605 | G     | T  | <i>FAH</i>      | AR    | c.554-1G>T;c.554-1G>T;c.554-1G>T;c.344-1G>T;n.482-1G>T;n.100-1G>T | 15q25.1                                                    | splice_acceptor_variant&intron_variant | HIGH                           | 0.03%    |       |
| LP | 1 | chr15 | 80464583 | C     | G  | <i>FAH</i>      | AR    | c.699C>G;c.699C>G;c.699C>G;c.489C>G                               | p.Asp233Glu;p.Asp233Glu;p.Asp233Glu;p.Asp163Glu            | 15q25.1                                | missense_variant               | MODERATE | 0.00% |
| P  | 1 | chr15 | 80472572 | G     | A  | <i>FAH</i>      | AR    | c.164G>A                                                          | p.Ser55Asn                                                 | 15q25.1                                | missense_variant               | MODERATE | 0.16% |
| LP | 1 | chr16 | 67693137 | T     | C  | <i>ACD</i>      | AD/AR | c.746A>G;c.737A>G;c.29A>G;c.497A>G;c.317A>G                       | p.Asn249Ser;p.Asn246Ser;p.Asn10Ser;p.Asn166Ser;p.Asn106Ser | 16q22.1                                | missense_variant               | MODERATE | 0.05% |
| LP | 1 | chr16 | 3807934  | T     | C  | <i>CREBBP</i>   | AD    | c.3485A>G                                                         |                                                            | 16p13.3                                | structural_interaction_variant | HIGH     | 0.01% |
| LP | 1 | chr16 | 50828116 | A     | AT | <i>CYLD</i>     | AD    | c.2470-3dupT;c.2461-3dupT;c.2470-3dupT;c.2461-                    | 16q12.1                                                    | splice_acceptor_variant&intron_variant | HIGH                           | 0.00%    |       |

|    |   |       |          |           |                                |              |       |                                                                      |                                                 |          |                         |          |       |
|----|---|-------|----------|-----------|--------------------------------|--------------|-------|----------------------------------------------------------------------|-------------------------------------------------|----------|-------------------------|----------|-------|
|    |   |       |          |           |                                |              |       | 3dupT;c.2461-3dupT;c.2461-3dupT;c.2470-3dupT;c.1915-3dupT;c.49-3dupT |                                                 |          |                         |          |       |
| LP | 1 | chr16 | 14020608 | G         | A                              | <i>ERCC4</i> | AR    | c.579G>A;c.579G>A;c.198G>A                                           | p.Trp193*;p.Trp193*;p.Trp66*                    | 16p13.12 | stop_gain               | HIGH     | 0.02% |
| LP | 1 | chr16 | 14031642 | G         | A                              | <i>ERCC4</i> | AR    | c.1831G>A;c.22G>A                                                    | p.Gly611Arg;p.Gly8Arg                           | 16p13.12 | missense_variant        | MODERATE | 0.00% |
| LP | 1 | chr16 | 89805462 | G         | A                              | <i>FANCA</i> | AR    | c.397C>T                                                             | p.Gln133*                                       | 16q24.3  | stop_gain               | HIGH     | 0.00% |
| LP | 1 | chr16 | 89809219 | C         | A                              | <i>FANCA</i> | AR    | c.3754G>T;c.3754G>T;c.232G>T;c.82G>T;c.16G>T                         | p.Glu1252*;p.Glu1252*;p.Glu78*;p.Glu28*;p.Glu6* | 16q24.3  | stop_gain               | HIGH     | 0.00% |
| LP | 1 | chr16 | 89882683 | G         | C                              | <i>FANCA</i> | AR    | c.341C>G                                                             | p.Ser114*                                       | 16q24.3  | stop_gain               | HIGH     | 0.08% |
| LP | 1 | chr16 | 89986531 | T         | C                              | <i>MC1R</i>  | AD    | c.865T>C;c.865T>C                                                    | p.Cys289Arg;p.Cys289Arg                         | 16q24.3  | missense_variant        | MODERATE | 0.02% |
| P  | 1 | chr16 | 23641191 | G         | GAGC<br>AAGTT<br>GGGGT<br>GTGC | <i>PALB2</i> | AD/AR | c.2267_2283dupGCACACCCCAACTTGCT                                      | p.His762fs                                      | 16p12.2  | frameshift_variant      | HIGH     | 0.00% |
| P  | 1 | chr16 | 23646296 | G         | C                              | <i>PALB2</i> | AD/AR | c.1571C>G                                                            | p.Ser524*                                       | 16p12.2  | stop_gain               | HIGH     | 0.00% |
| P  | 1 | chr16 | 23614911 | GAA<br>GT | G                              | <i>PALB2</i> | AD/AR | c.3426_3429delACTT;c.                                                | p.Leu1142fs;;                                   | 16p12.2  | frameshift_variant;stru | HIGH     | 0.00% |



|    |   |       |          |     |   |              |    |                                                                                                                                      |                                                                                            |                                        |                            |          |       |
|----|---|-------|----------|-----|---|--------------|----|--------------------------------------------------------------------------------------------------------------------------------------|--------------------------------------------------------------------------------------------|----------------------------------------|----------------------------|----------|-------|
|    |   |       |          |     |   |              |    | 3426_3429delACTT;c.3426_3429delACTT                                                                                                  |                                                                                            |                                        | ctural_interaction_variant |          |       |
| LP | 2 | chr16 | 2138446  | G   | C | <i>TSC2</i>  | AD | c.5260-1G>C;c.4915-1G>C;c.5059-1G>C;c.5131-1G>C;c.4951-1G>C;c.5191-1G>C;c.*4427-1G>C;c.5092-1G>C;n.2983-1G>C;n.2375-1G>C;c.1441-1G>C | 16p13.3                                                                                    | splice_acceptor_variant&intron_variant | HIGH                       | 0.00%    |       |
| LP | 1 | chr16 | 2129652  | C   | T | <i>TSC2</i>  | AD | c.3379C>T;c.3103C>T;c.3247C>T;c.3250C>T;c.3139C>T;c.3379C>T;c.3280C>T                                                                | p.Arg1127Trp;p.Arg1035Trp;p.Arg1083Trp;p.Arg1084Trp;p.Arg1047Trp;p.Arg1127Trp;p.Arg1094Trp | 16p13.3                                | missense_variant           | MODERATE | 0.09% |
| LP | 1 | chr17 | 63526149 | GTC | G | <i>AXIN2</i> | AD | c.2475_2476delGA;c.2280_2281delGA                                                                                                    | p.Glu825fs;p.Glu760fs                                                                      | 17q24.1                                | frameshift_variant         | HIGH     | 0.00% |
| P  | 1 | chr17 | 41246748 | GAA | G | <i>BRCA1</i> | AD | c.798_799delTT;c.798_7                                                                                                               | p.Ser267fs;p.Ser267fs;p.Ser2                                                               | 17q21.31                               | frameshift_variant         | HIGH     | 0.00% |

|   |   |       |          |   |   |              |    |                                                                                                                                                    |                                                                                                                                                 |                                     |                                            |       |       |
|---|---|-------|----------|---|---|--------------|----|----------------------------------------------------------------------------------------------------------------------------------------------------|-------------------------------------------------------------------------------------------------------------------------------------------------|-------------------------------------|--------------------------------------------|-------|-------|
|   |   |       |          |   |   |              |    | 99delTT;c.798_799delTT;c.798_799delTT;c.657_658delTT;c.147_148delTT;c.798_799delTT;c.720_721delTT;c.798_799delTT;c.393_394delTT                    | 67fs;p.Ser267fs;p.Ser220fs;p.Ser50fs;p.Ser267fs;p.Ser241fs;p.Ser267fs;p.Ser132fs                                                                |                                     |                                            |       |       |
| P | 1 | chr17 | 41245293 | A | T | <i>BRCA1</i> | AD | c.2255T>A;c.2255T>A;c.1367T>A;c.2255T>A;c.2255T>A;c.2114T>A                                                                                        | p.Leu752*;p.Leu752*;p.Leu456*;p.Leu752*;p.Leu752*;p.Leu705*                                                                                     | 17q21.31                            | stop_gained                                | HIGH  | 0.00% |
| P | 1 | chr17 | 41215934 | A | C | <i>BRCA1</i> | AD | c.5172T>G;c.5109T>G;c.1560T>G;c.4221T>G;c.4392T>G;c.1683T>G;c.1797T>G;c.39T>G;c.582T>G;c.4968T>G;c.1797T>G;c.1422T>G;c.1797T>G;c.1659T>G;c.5109T>G | p.Tyr1724*;p.Tyr1703*;p.Tyr520*;p.Tyr1407*;p.Tyr1464*;p.Tyr561*;p.Tyr599*;p.Tyr13*;p.Tyr194*;p.Tyr1656*;p.Tyr599*;p.Tyr474*;p.Tyr599*;p.Tyr553* | 17q21.31                            | structural_interaction_variant;stop_gained | HIGH  | 0.00% |
| P | 1 | chr17 | 41256137 | A | T | <i>BRCA1</i> | AD | c.441+2T>A;c.441+2T>A;c.441+2T>A;c.-448+2T>A;c.                                                                                                    | 17q21.31                                                                                                                                        | splice_donor_variant&intron_variant | HIGH                                       | 0.00% |       |

|    |   |       |          |           |   |              |       |                                                                                                                                                                                                                                                                                                     |                             |                                                    |                                                    |          |       |
|----|---|-------|----------|-----------|---|--------------|-------|-----------------------------------------------------------------------------------------------------------------------------------------------------------------------------------------------------------------------------------------------------------------------------------------------------|-----------------------------|----------------------------------------------------|----------------------------------------------------|----------|-------|
|    |   |       |          |           |   |              |       | .441+2T>A;<br>c.441+2T>A<br>;c.441+2T><br>A;c.441+2T<br>>A;c.300+2<br>T>A;c.*227<br>+2T>A;c.44<br>1+2T>A;c.1<br>89+2T>A;c.<br>441+2T>A;c<br>.300+2T>A;<br>c.189+2T>A<br>;n.505+2T><br>A;c.441+2T<br>>A;c.363+2<br>T>A;c.*377<br>+2T>A;c.44<br>1+2T>A;c.1<br>62+2T>A;c.<br>441+2T>A;c<br>. *227+2T>A |                             |                                                    |                                                    |          |       |
| P  | 1 | chr17 | 59761413 | CTTT<br>G | C | <i>BRIP1</i> | AD/AR | c.2990_2993<br>delCAA                                                                                                                                                                                                                                                                               | p.Thr997fs                  | 17q23.2                                            | frameshift_<br>variant                             | HIGH     | 0.00% |
| P  | 1 | chr17 | 8140757  | GCT<br>TT | G | <i>CTCF</i>  | AR    | c.724_727de<br>lAAAG                                                                                                                                                                                                                                                                                | p.Lys242fs                  | 17p13.1                                            | frameshift_<br>variant                             | HIGH     | 0.03% |
| LP | 1 | chr17 | 41061435 | G         | C | <i>G6PC</i>  | AR    | c.562G>C;c.<br>485G>C                                                                                                                                                                                                                                                                               | p.Gly188Arg;p<br>.Arg162Thr | 17q21.31                                           | missense_v<br>ariant&spli<br>ce_region_<br>variant | MODERATE | 0.01% |
| LP | 1 | chr17 | 41061435 | G         | A | <i>G6PC</i>  | AR    | c.562G>A;c.<br>485G>A                                                                                                                                                                                                                                                                               | p.Gly188Ser;p.<br>Arg162Lys | 17q21.31                                           | missense_v<br>ariant&spli<br>ce_region_<br>variant | MODERATE | 0.00% |
| P  | 1 | chr17 | 41055947 | G         | A | <i>G6PC</i>  | AR    | c.231-<br>1G>A;c.231<br>-<br>1G>A;c.231<br>-                                                                                                                                                                                                                                                        | 17q21.31                    | splice_acce<br>ptor_varian<br>t&intron_v<br>ariant | HIGH                                               | 0.00%    |       |

|    |   |       |          |             |           |                |    |                                                                                              |                                                                                               |          |                                                         |          |       |
|----|---|-------|----------|-------------|-----------|----------------|----|----------------------------------------------------------------------------------------------|-----------------------------------------------------------------------------------------------|----------|---------------------------------------------------------|----------|-------|
|    |   |       |          |             |           |                |    | 1G>A;n.296-1G>A                                                                              |                                                                                               |          |                                                         |          |       |
| LP | 1 | chr17 | 41063408 | C           | T         | <i>G6PC</i>    | AR | c.1039C>T                                                                                    | p.Gln347*                                                                                     | 17q21.31 | stop_gained                                             | HIGH     | 0.10% |
| LP | 1 | chr17 | 29533306 | G           | GTA<br>GT | <i>NFI</i>     | AD | c.1310_1311insAGTT;c.1310_1311insAGTT;c.1310_1311insAGTT;c.1412_1413insAGTT;c.308_309insAGTT | p.Glu438fs;p.Glu438fs;p.Glu472fs;p.Glu104fs                                                   | 17q11.2  | frameshift_variant                                      | HIGH     | 0.01% |
| LP | 1 | chr17 | 66521095 | C           | T         | <i>PRKARIA</i> | AD | c.545C>T                                                                                     | p.Thr182Met                                                                                   | 17q24.2  | missense_variant;missense_variant&splice_region_variant | MODERATE | 0.10% |
| LP | 1 | chr17 | 66518939 | C           | T         | <i>PRKARIA</i> | AD | c.220C>T                                                                                     | p.Arg74Cys                                                                                    | 17q24.2  | missense_variant                                        | MODERATE | 0.01% |
| P  | 1 | chr17 | 33433425 | G           | A         | <i>RAD51D</i>  | AD | c.616C>T;c.556C>T;c.556C>T;c.199C>T;c.421C>T;c.220C>T;c.199C>T;c.199C>T;c.562C>T;c.25C>T     | p.Arg206*;p.Arg186*;p.Arg186*;p.Arg67*;p.Arg141*;p.Arg74*;p.Arg67*;p.Arg67*;p.Arg188*;p.Arg9* | 17q12    | stop_gained                                             | HIGH     | 0.01% |
| P  | 1 | chr17 | 33446581 | G           | A         | <i>RAD51D</i>  | AD | c.52C>T                                                                                      | p.Gln18*                                                                                      | 17q12    | stop_gained                                             | HIGH     | 0.00% |
| LP | 1 | chr17 | 7578469  | 13bpd<br>el |           | <i>TP53</i>    | AD |                                                                                              |                                                                                               | 17p13.1  | frameshift_variant                                      | HIGH     | 0.00% |
| LP | 2 | chr17 | 7579368  | A           | G         | <i>TP53</i>    | AD | c.319T>C                                                                                     |                                                                                               | 17p13.1  | structural_interaction_variant                          | HIGH     | 0.08% |

|    |   |       |         |    |   |      |    |                                                   |                                                                   |         |                                |          |       |
|----|---|-------|---------|----|---|------|----|---------------------------------------------------|-------------------------------------------------------------------|---------|--------------------------------|----------|-------|
| P  | 1 | chr17 | 7578479 | G  | C | TP53 | AD | c.451C>G;c.55C>G;c.172C>G;c.451C>G                | p.Pro151Ala;p.Pro19Ala;p.Pro58Ala;p.Pro151Ala                     | 17p13.1 | missense_variant               | MODERATE | 0.00% |
| P  | 1 | chr17 | 7577121 | G  | A | TP53 | AD | c.817C>T                                          |                                                                   | 17p13.1 | structural_interaction_variant | HIGH     | 0.00% |
| P  | 1 | chr17 | 7578190 | T  | C | TP53 | AD | c.659A>G                                          |                                                                   | 17p13.1 | structural_interaction_variant | HIGH     | 0.00% |
| P  | 1 | chr17 | 7577106 | G  | C | TP53 | AD | c.832C>G                                          |                                                                   | 17p13.1 | structural_interaction_variant | HIGH     | 0.00% |
| P  | 1 | chr17 | 7579329 | T  | C | TP53 | AD | c.358A>G                                          |                                                                   | 17p13.1 | structural_interaction_variant | HIGH     | 0.00% |
| P  | 3 | chr17 | 7577538 | C  | T | TP53 | AD | c.743G>A                                          |                                                                   | 17p13.1 | protein_protein_contact        | HIGH     | 0.03% |
| P  | 1 | chr17 | 7577082 | C  | T | TP53 | AD | c.856G>A                                          |                                                                   | 17p13.1 | structural_interaction_variant | HIGH     | 0.00% |
| P  | 1 | chr17 | 7577121 | G  | T | TP53 | AD | c.817C>A                                          |                                                                   | 17p13.1 | structural_interaction_variant | HIGH     | 0.01% |
| P  | 1 | chr17 | 7577120 | C  | T | TP53 | AD | c.818G>A                                          |                                                                   | 17p13.1 | structural_interaction_variant | HIGH     | 0.10% |
| P  | 1 | chr17 | 7578406 | C  | T | TP53 | AD | c.524G>A                                          |                                                                   | 17p13.1 | structural_interaction_variant | HIGH     | 0.00% |
| LP | 1 | chr17 | 7577057 | TC | T | TP53 | AD | c.880delG;c.880delG;c.880delG;c.880delG;c.484delG | p.Glu294fs;p.Glu294fs;p.Glu294fs;p.Glu294fs;p.Glu294fs;p.Glu162fs | 17p13.1 | frameshift_variant             | HIGH     | 0.00% |



|    |   |       |         |                                |   |      |    |                                                                                                     |                                                                   |                                     |                                                   |       |       |  |
|----|---|-------|---------|--------------------------------|---|------|----|-----------------------------------------------------------------------------------------------------|-------------------------------------------------------------------|-------------------------------------|---------------------------------------------------|-------|-------|--|
|    |   |       |         |                                |   |      |    | delG;c.439delG;c.439delG;c.439delG                                                                  |                                                                   |                                     |                                                   |       |       |  |
| P  | 2 | chr17 | 7578263 | G                              | A | TP53 | AD | c.586C>T                                                                                            | p.Arg196*                                                         | 17p13.1                             | structural_interaction_variant;stop_gained        | HIGH  | 0.00% |  |
| P  | 1 | chr17 | 7578463 | CGG<br>GTG<br>CCG<br>GGC<br>GG | C | TP53 | AD | c.454_466delCCGCCCGGCACCC                                                                           | p.Pro152fs                                                        | 17p13.1                             | frameshift_variant;structural_interaction_variant | HIGH  | 0.00% |  |
| P  | 2 | chr17 | 7577035 | TG                             | T | TP53 | AD | c.902delC;c.902delC;c.902delC;c.902delC;c.506delC                                                   | p.Pro301fs;p.Pro301fs;p.Pro301fs;p.Pro301fs;p.Pro301fs;p.Pro169fs | 17p13.1                             | frameshift_variant                                | HIGH  | 0.00% |  |
| P  | 1 | chr17 | 7590694 | C                              | A | TP53 | AD | c.-29+1G>T;c.-29+1G>T;c.-29+1G>T;c.-26+1G>T;c.-22+1G>T;c.-29+1G>T;n.111+1G>T;c.-29+1G>T;c.-132+1G>T | 17p13.1                                                           | splice_donor_variant&intron_variant | HIGH                                              | 0.00% |       |  |
| LP | 1 | chr17 | 7577497 | A                              | C | TP53 | AD | c.782+2T>G;c.782+2T>G;c.782+2T>G;n.664+2                                                            | 17p13.1                                                           | splice_donor_variant&intron_variant | HIGH                                              | 0.00% |       |  |

|   |   |       |         |   |   |      |    |                                                                                                               |         |                                                 |      |       |  |
|---|---|-------|---------|---|---|------|----|---------------------------------------------------------------------------------------------------------------|---------|-------------------------------------------------|------|-------|--|
|   |   |       |         |   |   |      |    | T>G;n.664+2T>G;n.664+2T>G;c.782+2T>G;c.782+2T>G;c.782+2T>G;c.782+2T>G;c.386+2T>G                              |         |                                                 |      |       |  |
| P | 1 | chr17 | 7590694 | C | G | TP53 | AD | c.-29+1G>C;c.-29+1G>C;c.-29+1G>C;c.-26+1G>C;c.-22+1G>C;c.-29+1G>C;n.111+1G>C;c.-29+1G>C;c.-132+1G>C           | 17p13.1 | splice_don<br>or_variant<br>&intron_va<br>riant | HIGH | 0.00% |  |
| P | 1 | chr17 | 7577498 | C | T | TP53 | AD | c.782+1G>A;c.782+1G>A;c.782+1G>A;n.664+1G>A;n.664+1G>A;n.664+1G>A;c.782+1G>A;c.782+1G>A;c.782+1G>A;c.386+1G>A | 17p13.1 | splice_don<br>or_variant<br>&intron_va<br>riant | HIGH | 0.00% |  |
| P | 1 | chr17 | 7577018 | C | T | TP53 | AD | c.919+1G>A;c.919+1G>A;n.801+1                                                                                 | 17p13.1 | splice_don<br>or_variant                        | HIGH | 0.00% |  |





|    |   |       |         |                 |   |      |    |                                                                |                                                                                               |         |                                           |          |       |
|----|---|-------|---------|-----------------|---|------|----|----------------------------------------------------------------|-----------------------------------------------------------------------------------------------|---------|-------------------------------------------|----------|-------|
|    |   |       |         |                 |   |      |    | G>T;c.32G>T;c.578G>T                                           | Gly11Val;p.Gly193Val                                                                          |         |                                           |          |       |
| LP | 2 | chr17 | 7569531 | T               | C | TP53 | AD | c.1025A>G                                                      | p.His342Arg                                                                                   | 17p13.1 | missense_variant                          | MODERATE | 0.00% |
| LP | 1 | chr17 | 7574032 | A               | C | TP53 | AD | c.995T>G;                                                      | p.Ile332Ser                                                                                   | 17p13.1 | missense_variant&splice_region_variant    | MODERATE | 0.00% |
| P  | 1 | chr17 | 7578286 | A               | G | TP53 | AD | c.563T>C;c.563T>C;c.563T>C;c.563T>C;c.563T>C;c.167T>C;c.284T>C | p.Leu188Pro;p.Leu188Pro;p.Leu188Pro;p.Leu188Pro;p.Leu188Pro;p.Leu56Pro;p.Leu95Pro             | 17p13.1 | missense_variant                          | MODERATE | 0.00% |
| LP | 1 | chr17 | 7578376 | C               | T | TP53 | AD | c.554G>A;c.554G>A;c.554G>A;c.554G>A;c.554G>A;c.158G>A;c.275G>A | p.Ser185Asn;p.Ser185Asn;p.Ser185Asn;p.Ser185Asn;p.Ser185Asn;p.Ser185Asn;p.Ser53Asn;p.Ser92Asn | 17p13.1 | missense_variant                          | MODERATE | 0.02% |
| LP | 1 | chr17 | 7577541 | T               | C | TP53 | AD | c.740A>G                                                       |                                                                                               | 17p13.1 | protein_protein_contact                   | HIGH     | 0.00% |
| LP | 1 | chr17 | 7577577 | T               | C | TP53 | AD | c.704A>G                                                       |                                                                                               | 17p13.1 | structural_interaction_variant            | HIGH     | 0.09% |
| LP | 1 | chr17 | 7578484 | GAA<br>TCA<br>A | G | TP53 | AD | c.440_445de<br>ITTGATT                                         |                                                                                               | 17p13.1 | structural_interaction_variant            | HIGH     | 0.00% |
| LP | 1 | chr17 | 7578531 | C               | T | TP53 | AD | c.3G>A;c.399G>A                                                | p.Met1?                                                                                       | 17p13.1 | structural_interaction_variant;start_lost | HIGH     | 0.00% |

|    |   |       |          |    |   |               |    |                                              |                                                                        |          |                                                   |          |       |
|----|---|-------|----------|----|---|---------------|----|----------------------------------------------|------------------------------------------------------------------------|----------|---------------------------------------------------|----------|-------|
| LP | 1 | chr17 | 57181695 | AC | A | <i>TRIM37</i> | AR | c.81delG;c.81delG;c.81delG;c.78delG          | p.Cys28fs;p.Cys28fs;p.Cys28fs;p.Cys28fs;p.Cys27fs;p.Cys28fs            | 17q22    | frameshift_variant;structural_interaction_variant | HIGH     | 0.00% |
| LP | 1 | chr19 | 852396   | G  | C | <i>ELANE</i>  | AD | c.67+1G>C                                    |                                                                        | 19p13.3  | splice_donor_variant&intron_variant               | HIGH     | 0.00% |
| LP | 3 | chr19 | 45855906 | G  | A | <i>ERCC2</i>  | AR | c.1904C>T;c.1670C>T;c.1832C>T                | p.Ala635Val;p.Ala557Val;p.Ala611Val                                    | 19q13.32 | missense_variant&splice_region_variant            | MODERATE | 0.40% |
| LP | 1 | chr19 | 45855828 | G  | C | <i>ERCC2</i>  | AR | c.1982C>G;c.1748C>G;c.1910C>G                | p.Ala661Gly;p.Ala583Gly;p.Ala637Gly                                    | 19q13.32 | missense_variant                                  | MODERATE | 0.00% |
| LP | 1 | chr19 | 45868349 | C  | T | <i>ERCC2</i>  | AR | c.428G>A;c.356G>A;c.356G>A;c.356G>A;c.278G>A | p.Arg143Gln;p.Arg119Gln;p.Arg119Gln;p.Arg119Gln;p.Arg119Gln;p.Arg93Gln | 19q13.32 | missense_variant                                  | MODERATE | 0.05% |
| LP | 1 | chr19 | 45867721 | G  | A | <i>ERCC2</i>  | AR | c.679C>T;c.445C>T;c.607C>T                   | p.Arg227Cys;p.Arg149Cys;p.Arg203Cys                                    | 19q13.32 | missense_variant                                  | MODERATE | 0.11% |
| LP | 1 | chr19 | 45860761 | G  | A | <i>ERCC2</i>  | AR | c.1348C>T;c.1114C>T;c.1276C>T;c.469C>T       | p.Arg450Cys;p.Arg372Cys;p.Arg426Cys;p.Arg157Cys                        | 19q13.32 | missense_variant                                  | MODERATE | 0.00% |
| LP | 1 | chr19 | 45860760 | C  | T | <i>ERCC2</i>  | AR | c.1349G>A;c.1115G>A;c.1277G>A;c.470G>A       | p.Arg450His;p.Arg372His;p.Arg426His;p.Arg157His                        | 19q13.32 | missense_variant                                  | MODERATE | 0.04% |
| LP | 1 | chr19 | 45856397 | C  | T | <i>ERCC2</i>  | AR | c.1775G>A;c.1541G>A;c.1703G>A                | p.Arg592His;p.Arg514His;p.Arg568His                                    | 19q13.32 | missense_variant                                  | MODERATE | 0.09% |

|    |   |       |          |                        |   |              |    |                                                                                                |                                                                                                       |                                                     |                                                                                        |          |       |
|----|---|-------|----------|------------------------|---|--------------|----|------------------------------------------------------------------------------------------------|-------------------------------------------------------------------------------------------------------|-----------------------------------------------------|----------------------------------------------------------------------------------------|----------|-------|
| LP | 1 | chr19 | 45856059 | C                      | G | <i>ERCC2</i> | AR | c.1847G>C;<br>c.1613G>C;<br>c.1775G>C                                                          | p.Arg616Pro;p<br>.Arg538Pro;p.<br>Arg592Pro                                                           | 19q13.32                                            | missense_v<br>ariant                                                                   | MODERATE | 0.02% |
| LP | 2 | chr19 | 45867291 | G                      | A | <i>ERCC2</i> | AR | c.902C>T;c.<br>668C>T;c.8<br>30C>T;c.23<br>C>T;c.830C<br>>T;c.830C><br>T;c.830C>T              | p.Thr301Met;p<br>.Thr223Met;p.<br>Thr277Met;p.<br>Thr8Met;p.Thr<br>>T;p.Thr2<br>77Met;p.Thr27<br>7Met | 19q13.32                                            | missense_v<br>ariant                                                                   | MODERATE | 0.00% |
| LP | 1 | chr19 | 45873449 | T                      | C | <i>ERCC2</i> | AR | c.47A>G                                                                                        | p.Tyr16Cys                                                                                            | 19q13.32                                            | missense_v<br>ariant                                                                   | MODERATE | 0.43% |
| LP | 1 | chr19 | 45858047 | C                      | T | <i>ERCC2</i> | AR | c.1606G>A;<br>c.1372G>A;<br>c.1534G>A                                                          | p.Val536Met;p<br>.Val458Met;p.<br>Val512Met                                                           | 19q13.32                                            | missense_v<br>ariant                                                                   | MODERATE | 0.05% |
| LP | 1 | chr19 | 45855803 | CCT                    | C | <i>ERCC2</i> | AR | c.2005_2006<br>delAG;c.177<br>1_1772delA<br>G;c.1933_19<br>34delAG                             | p.Arg669fs;p.<br>Arg591fs;p.Ar<br>g645fs                                                              | 19q13.32                                            | frameshift_<br>variant                                                                 | HIGH     | 0.01% |
| LP | 1 | chr19 | 45860730 | A                      | G | <i>ERCC2</i> | AR | c.1377+2T><br>C;n.1465+2<br>T>C;n.548+<br>2T>C;c.114<br>3+2T>C;c.1<br>305+2T>C;c.<br>.498+2T>C | 19q13.32                                                                                              | splice_don<br>or_vari<br>ant<br>&intron_va<br>riant | HIGH                                                                                   | 0.00%    |       |
| LP | 1 | chr19 | 45873795 | TCA<br>TGG<br>CGC<br>C | T | <i>ERCC2</i> | AR | c.-<br>6_3delGGC<br>GCCATG                                                                     | p.Met1del                                                                                             | 19q13.32                                            | start_lost&<br>splice_regi<br>on_vari<br>ant<br>&conservat<br>ive_infram<br>e_deletion | HIGH     | 0.00% |
| LP | 1 | chr19 | 50921180 | AC                     | A | <i>POLD1</i> | AD | c.3383delC;<br>c.3305delC;<br>c.3305delC                                                       | p.Pro1128fs;p.<br>Pro1102fs;p.Pr<br>o1102fs                                                           | 19q13.33                                            | frameshift_<br>variant                                                                 | HIGH     | 0.02% |
| LP | 1 | chr19 | 42364900 | C                      | T | <i>RPS19</i> | AD | c.56C>T                                                                                        | p.Ala19Val                                                                                            | 19q13.2                                             | missense_v<br>ariant                                                                   | MODERATE | 0.00% |



|    |   |       |          |     |   |              |    |                                                                                                                                      |                                                                                                                                                                       |          |                                          |          |       |
|----|---|-------|----------|-----|---|--------------|----|--------------------------------------------------------------------------------------------------------------------------------------|-----------------------------------------------------------------------------------------------------------------------------------------------------------------------|----------|------------------------------------------|----------|-------|
|    |   |       |          |     |   |              |    | c.444+1G>A;c.-220+1G>A;c.6+1G>A;c.537+1G>A;c.*424+1G>A;c.474+1G>A                                                                    |                                                                                                                                                                       |          |                                          |          |       |
| LP | 2 | chr22 | 29107974 | C   | T | <i>CHEK2</i> | AD | c.844G>A;c.715G>A;c.715G>A;c.715G>A;c.715G>A;c.715G>A;c.715G>A;c.715G>A;c.442G>A;c.52G>A;c.715G>A;c.442G>A;c.514G>A;c.52G>A;c.808G>A | p.Glu282Lys;p.Glu239Lys;p.Glu239Lys;p.Glu148Lys;p.Glu18Lys;p.Glu239Lys;p.Glu239Lys;p.Glu239Lys;p.Glu239Lys;p.Glu239Lys;p.Glu148Lys;p.Glu172Lys;p.Glu18Lys;p.Glu270Lys | 22q12.1  | missense_variant                         | MODERATE | 0.03% |
| LP | 1 | chr22 | 21346078 | TC  | T | <i>LZTR1</i> | AD | c.955delC;c.898delC                                                                                                                  | p.Gln319fs;p.Gln300fs                                                                                                                                                 | 22q11.21 | frameshift_variant                       | HIGH     | 0.00% |
| LP | 1 | chr22 | 21349014 | AAG | A | <i>LZTR1</i> | AD | c.1784_1785delAG;c.1727_1728delAG;c.96_97delAG;c.65_66delAG                                                                          | p.Lys595fs;p.Lys576fs;p.Gly33fs;p.Lys22fs                                                                                                                             | 22q11.21 | frameshift_variant&splice_region_variant | HIGH     | 0.00% |
| P  | 1 | chr22 | 30035077 | A   | C | <i>NF2</i>   | AD | c.241-2A>C                                                                                                                           |                                                                                                                                                                       | 22q12.2  | splice_acceptor_variant&intron_variant   | HIGH     | 0.00% |
| LP | 1 | chr22 | 30067870 | C   | T | <i>NF2</i>   | AD | c.1055C>T;c.932C>T;c.1055C>T;c.806C>T;c.8                                                                                            | p.Thr352Met;p.Thr311Met;p.Thr352Met;p.Thr269Met;p.                                                                                                                    | 22q12.2  | missense_variant                         | MODERATE | 0.00% |

|    |   |      |           |   |   |             |     |                                    |                                                  |         |                  |          |       |
|----|---|------|-----------|---|---|-------------|-----|------------------------------------|--------------------------------------------------|---------|------------------|----------|-------|
|    |   |      |           |   |   |             |     | 06C>T;c.1055C>T;c.929C>T;c.1055C>T | Thr269Met;p. Thr352Met;p. Thr310Met;p. Thr352Met |         |                  |          |       |
| P  | 1 | chrX | 154002944 | C | T | <i>DKC1</i> | XLR | c.1223C>T;c.584C>T                 | p. Thr408Ile;p. Thr195Ile                        | Xq28    | missense_variant | MODERATE | 0.00% |
| LP | 1 | chrX | 132730460 | T | C | <i>GPC3</i> | XLR | c.768A>G                           | p. Ter256Trpext*?                                | Xq26.2  | stop_lost        | HIGH     | 0.00% |
| LP | 2 | chrX | 48547812  | T | C | <i>WAS</i>  | XLR | c.1442T>C                          | p. Ile481Thr                                     | Xp11.23 | missense_variant | MODERATE | 0.00% |

P = pathogenic, LP = likely pathogenic, VUS = variant of uncertain significance, LB = likely benign.

AD, autosomal dominant; AR, autosomal recessive; XLR, X-linked recessive; UNK, unknown inheritance. DM, disease-causing mutation.

DM, disease-causing mutation.

Gene inher., gene inheritance.

**eTable 6.** Prevalence of Potentially Pathogenic Variants in 238 Cancer-Susceptibility Genes in 1244 Patients With Osteosarcoma Compared With 28 235 Individuals Without Cancer

| 238 genes: inheritance* | 1,244 Osteosarcoma cases                 |              |                                    |              |                                               |              | 28,235 Cancer-free controls                  |               |                           |               |
|-------------------------|------------------------------------------|--------------|------------------------------------|--------------|-----------------------------------------------|--------------|----------------------------------------------|---------------|---------------------------|---------------|
|                         | 1,004 cases, combined discovery: NCI WES |              | 100 cases, replication 1: WES data |              | 140 cases, replication 2: targeted sequencing |              | 1,062 in-house cancer-free controls: NCI WES |               | 27,173 ExAC NFE: WES data |               |
|                         | N                                        | % of cases   | N                                  | % of cases   | N                                             | % of cases   | N                                            | % of controls | N                         | % of controls |
| AD, AD/AR               | 185                                      | 18.4%        | 16                                 | 16.0%        | 24                                            | 17.1%        | 56                                           | 5.3%          | 1491                      | 5.5%          |
| AR                      | 92                                       | 9.2%         | 10                                 | 10.0%        | 14                                            | 10.0%        | 72                                           | 6.8%          | 1041                      | 3.8%          |
| XLR                     | 4                                        | 0.4%         | 2                                  | 2.0%         | 0                                             | 0.0%         | 0                                            | 0.0%          | 7                         | 0.03%         |
| <b>Total prevalence</b> |                                          | <b>28.0%</b> |                                    | <b>28.0%</b> |                                               | <b>27.1%</b> |                                              | <b>12.1%</b>  |                           | <b>9.3%</b>   |
| <b>95% CI</b>           |                                          | 22.7-33.2    |                                    | 11.4-44.6    |                                               | 13.0-41.3    |                                              | 6.4-17.7      |                           | 8.2-10.5      |

Abbreviations: AD, autosomal dominant; AR, autosomal recessive; XLR, X-linked recessive; WES, whole exome sequencing; P, pathogenic; LP, likely pathogenic; NFE, non-Finnish European.

\*, unknown inheritance P/LP variants (N=3) are included with AD, AD/AR.



**eTable 7.** Top Statistically Significant Cancer-Susceptibility Genes With a Higher Burden of Variants

Higher burden of variance in European (EUR) patients with osteosarcoma (n = 732) and European in-house individuals in the control group (n = 994) for the specified burden test, subsequently compared with individuals of non-Finnish European ancestry in the ExAC group (n = 27 173).

| Genes evaluated, Burden test       | Top genes                | Inheritance | $P_{\text{burden}}$ | N, EUR cases | % of cases | N, EUR controls | % of controls | N, ExAC NFE | % ExAC NFE | $P^{\ddagger}$ | OR*   | 95% CI          |
|------------------------------------|--------------------------|-------------|---------------------|--------------|------------|-----------------|---------------|-------------|------------|----------------|-------|-----------------|
| <i>Cancer-susceptibility genes</i> |                          |             |                     |              |            |                 |               |             |            |                |       |                 |
| Pathogenic variants (P, LP)        |                          |             |                     |              |            |                 |               |             |            |                |       |                 |
|                                    | <i>TP53</i> <sup>†</sup> | AD          | <b>3.2E-8</b>       | 30           | 4.1%       | 3               | 0.3%          | 17          | 0.1%       | <b>9.0E-44</b> | 79.5  | 46.3 to 136.6   |
|                                    | <i>CDKN2A</i>            | AD          | 3.1E-3              | 8            | 1.1%       | 0               | 0.0%          | 0           | 0.0%       | <b>2.2E-13</b> | 637.6 | 36.8 to 11057.9 |
|                                    | <i>MEN1</i>              | AD          | 0.020               | 4            | 0.5%       | 0               | 0.0%          | 0           | 0.0%       | <b>4.7E-7</b>  | 335.7 | 18.1 to 6241.3  |
|                                    | <i>VHL</i>               | AD          | 0.020               | 4            | 0.5%       | 0               | 0.0%          | 2           | 0.0%       | <b>3.3E-7</b>  | 74.6  | 13.6 to 408.1   |
|                                    | <i>POT1</i>              | AD/AR       | 0.020               | 4            | 0.5%       | 0               | 0.0%          | 7           | 0.0%       | <b>4.5E-5</b>  | 21.3  | 6.2 to 73.0     |
|                                    | <i>RECQL4</i>            | AR          | 0.021               | 7            | 1.0%       | 1               | 0.1%          | 50          | 0.2%       | 4.9E-4         | 5.2   | 2.4 to 11.6     |
|                                    | <i>FAH</i>               | AR          | 0.043               | 3            | 0.4%       | 0               | 0.0%          | 33          | 0.1%       | 0.061          | 3.4   | 1.0 to 11.1     |
|                                    | <i>APC</i>               | AD          | 0.043               | 3            | 0.4%       | 0               | 0.0%          | 3           | 0.0%       | <b>8.2E-5</b>  | 37.3  | 7.5 to 184.9    |
|                                    | <i>MSH2</i>              | AD/AR       | 0.043               | 3            | 0.4%       | 0               | 0.0%          | 6           | 0.0%       | 6.2E-4         | 18.6  | 4.6 to 74.6     |
| Damaging variants (P, LP, VUS_D)   |                          |             |                     |              |            |                 |               |             |            |                |       |                 |
|                                    | <i>RBI</i>               | AD          | 0.008               | 9            | 1.2%       | 2               | 0.2%          | 43          | 0.2%       | <b>3.5E-6</b>  | 7.8   | 3.8 to 16.2     |
|                                    | <i>MRE11A</i>            | AD/AR       | 0.009               | 7            | 1.0%       | 1               | 0.1%          | 110         | 0.4%       | 0.031          | 2.4   | 1.1 to 5.1      |
|                                    | <i>RECQL4</i>            | AR          | 0.010               | 8            | 1.1%       | 1               | 0.1%          | 71          | 0.3%       | 8.1E-4         | 4.2   | 2.0 to 8.8      |
|                                    | <i>VHL</i>               | AD          | 0.020               | 6            | 0.8%       | 1               | 0.1%          | 24          | 0.1%       | <b>5.8E-5</b>  | 9.3   | 3.8 to 22.9     |
|                                    | <i>MEN1</i>              | AD          | 0.042               | 5            | 0.7%       | 1               | 0.1%          | 57          | 0.2%       | 0.020          | 3.3   | 1.3 to 8.2      |
|                                    | <i>CEP57</i>             | AR          | 0.043               | 3            | 0.4%       | 0               | 0.0%          | 5           | 0.0%       | 3.7E-4         | 22.4  | 5.3 to 93.7     |
|                                    | <i>FGFR2</i>             | AD          | 0.043               | 3            | 0.4%       | 0               | 0.0%          | 54          | 0.2%       | 0.180          | 2.1   | 0.6 to 6.6      |
| All rare variants                  |                          |             |                     |              |            |                 |               |             |            |                |       |                 |
|                                    | <i>ERCC4</i>             | AR          | 5.0E-4              | 57           | 7.8%       | 37              | 3.7%          | 819         | 3.0%       | <b>1.7E-10</b> | 2.7   | 2.0 to 3.6      |

|  |               |    |       |    |      |    |      |      |      |                |      |             |
|--|---------------|----|-------|----|------|----|------|------|------|----------------|------|-------------|
|  | <i>GLI3</i>   | AD | 0.008 | 39 | 5.3% | 28 | 2.8% | 1124 | 4.1% | 0.114          | 1.3  | 0.9 to 1.8  |
|  | <i>PHOX2B</i> | AD | 0.014 | 23 | 3.1% | 12 | 1.2% | 64   | 0.2% | <b>1.5E-18</b> | 13.7 | 8.5 to 22.3 |
|  | <i>WT1</i>    | AD | 0.035 | 21 | 2.9% | 14 | 1.4% | 196  | 0.7% | <b>1.7E-7</b>  | 4.1  | 2.6 to 6.4  |
|  | <i>BRAF</i>   | AD | 0.045 | 15 | 2.0% | 6  | 0.6% | 84   | 0.3% | <b>1.7E-8</b>  | 6.7  | 3.9 to 11.7 |

Abbreviations: AD, autosomal dominant; AR, autosomal recessive; P, pathogenic; LP, likely pathogenic; VUS\_D = variant of uncertain significance (VUS) *in silico* predicted damaging; NFE, non-Finnish European; N, number of individuals with the specified rare variants.

†, *TP53* was the top most significant gene in all burden analyses, it is shown only once.

‡, exact binomial test P value, tests if the proportion of cases with variants is the same as observed in the ExAC NFE controls.

Bolded values remains significant at 0.0002 if a Bonferroni correction for multiple tests is used.

\*, EUR cases vs. ExAC NFE, odds of cases carrying a mutation in the specified gene.

**eTable 8.** Characteristics of Individuals With *TP53* Pathogenic/Likely Pathogenic Variants and All Pathogenic/Likely Pathogenic Cancer-Susceptibility Gene Variants in 1004 Patients With Osteosarcoma in the Discovery Set

| Variable <sup>†</sup>       |                   | N Individuals<br>Evaluable | No <i>TP53</i> P/LP<br>variant |        | <i>TP53</i> P/LP<br>variant |       | P     | No P/LP<br>variant |       | Any P/LP<br>variant <sup>‡</sup> |       | P     | 2 or more<br>P/LP variants |       | P     |
|-----------------------------|-------------------|----------------------------|--------------------------------|--------|-----------------------------|-------|-------|--------------------|-------|----------------------------------|-------|-------|----------------------------|-------|-------|
|                             |                   |                            | N                              | N %    | N                           | N %   |       | N                  | N %   | N                                | N %   |       | N                          | N %   |       |
| Age at dx, mean (SD)        |                   | 974                        | 16.5 (10)                      |        | 14.7 (6)                    |       | 0.155 | 16.9 (10)          |       | 15.3 (7)                         |       | 0.015 | 15.6 (7)                   |       | 0.327 |
| Age group (years)           | 0-10              | 151                        | 142                            | 94.0%  | 9                           | 6.0%  |       | 107                | 70.9% | 44                               | 29.1% |       | 6                          | 4.0%  |       |
|                             | 11-20             | 698                        | 672                            | 96.3%  | 26                          | 3.7%  |       | 521                | 74.6% | 177                              | 25.4% |       | 25                         | 3.6%  |       |
|                             | 21-30             | 67                         | 62                             | 92.5%  | 5                           | 7.5%  |       | 48                 | 71.6% | 19                               | 28.4% |       | 5                          | 7.5%  |       |
|                             | 31-40             | 26                         | 25                             | 96.2%  | 1                           | 3.8%  |       | 19                 | 73.1% | 7                                | 26.9% |       | 1                          | 3.8%  |       |
|                             | 41+               | 32                         | 32                             | 100%   | 0                           | 0.0%  | 0.316 | 30                 | 93.8% | 2                                | 6.3%  | 0.107 | 0                          | 0.0%  | 0.396 |
| Gender                      | Male              | 540                        | 519                            | 96.1%  | 21                          | 3.9%  |       | 397                | 73.5% | 143                              | 26.5% |       | 25                         | 4.6%  |       |
|                             | Female            | 462                        | 440                            | 95.2%  | 22                          | 4.8%  | 0.490 | 346                | 74.9% | 116                              | 25.1% | 0.620 | 13                         | 2.8%  | 0.165 |
| Ancestry <sup>‡</sup>       | EUR               | 732                        | 702                            | 95.9%  | 30                          | 4.1%  |       | 544                | 74.3% | 188                              | 25.7% |       | 24                         | 3.3%  |       |
|                             | AFR               | 54                         | 49                             | 90.7%  | 5                           | 9.3%  |       | 40                 | 74.1% | 14                               | 25.9% |       | 3                          | 5.6%  |       |
|                             | ADM               | 73                         | 71                             | 97.3%  | 2                           | 2.7%  |       | 60                 | 82.2% | 13                               | 17.8% |       | 2                          | 2.7%  |       |
|                             | ASN               | 3                          | 3                              | 100%   | 0                           | 0.0%  |       | 3                  | 100%  | 0                                | 0.0%  |       | 0                          | 0.0%  |       |
|                             | His               | 142                        | 136                            | 95.8%  | 6                           | 4.2%  | 0.422 | 97                 | 68.3% | 45                               | 31.7% | 0.196 | 9                          | 6.3%  | 0.480 |
| AFR vs. non-AFR<br>ancestry | non-AFR           | 950                        | 912                            | 96.0%  | 38                          | 4.0%  |       | 704                | 74.1% | 246                              | 25.9% |       | 35                         | 3.7%  |       |
|                             | AFR               | 54                         | 49                             | 90.7%  | 5                           | 9.3%  | 0.060 | 40                 | 74.1% | 14                               | 25.9% | 0.990 | 3                          | 5.6%  | 0.387 |
| Osteosarcoma location       | Lower long bones  | 746                        | 719                            | 96.4%  | 27                          | 3.6%  |       | 562                | 75.3% | 184                              | 24.7% |       | 28                         | 3.8%  |       |
|                             | Lower short bones | 7                          | 7                              | 100.0% | 0                           | 0.0%  |       | 4                  | 57.1% | 3                                | 42.9% |       | 0                          | 0.0%  |       |
|                             | Upper long bones  | 91                         | 86                             | 94.5%  | 5                           | 5.5%  |       | 66                 | 72.5% | 25                               | 27.5% |       | 2                          | 2.2%  |       |
|                             | Upper short bones | 2                          | 2                              | 100%   | 0                           | 0.0%  |       | 2                  | 100%  | 0                                | 0.0%  |       | 0                          | 0.0%  |       |
|                             | Face or skull     | 2                          | 2                              | 100%   | 0                           | 0.0%  |       | 2                  | 100%  | 0                                | 0.0%  |       | 0                          | 0.0%  |       |
|                             | Mandible          | 2                          | 2                              | 100%   | 0                           | 0.0%  |       | 1                  | 50.0% | 1                                | 50.0% |       | 0                          | 0.0%  |       |
|                             | Chest region      | 10                         | 8                              | 80.0%  | 2                           | 20.0% |       | 6                  | 60.0% | 4                                | 40.0% |       | 0                          | 0.0%  |       |
|                             | Pelvic region     | 31                         | 27                             | 87.1%  | 4                           | 12.9% |       | 21                 | 67.7% | 10                               | 32.3% |       | 4                          | 12.9% |       |
|                             | Soft tissue       | 5                          | 4                              | 80.0%  | 1                           | 20.0% |       | 3                  | 60.0% | 2                                | 40.0% |       | 0                          | 0.0%  |       |
|                             | Vertebral column  | 1                          | 1                              | 100%   | 0                           | 0.0%  | 0.086 | 1                  | 100%  | 0                                | 0.0%  | 0.740 | 0                          | 0.0%  | 0.346 |
|                             | Extremity         | 846                        | 814                            | 96.2%  | 32                          | 3.8%  |       | 634                | 74.9% | 212                              | 25.1% |       | 30                         | 3.5%  |       |

|                                  |             |     |     |       |    |       |       |     |       |     |       |       |    |      |       |
|----------------------------------|-------------|-----|-----|-------|----|-------|-------|-----|-------|-----|-------|-------|----|------|-------|
| Axial vs. Extremity location     | Axial       | 51  | 44  | 86.3% | 7  | 13.7% | 0.001 | 34  | 66.7% | 17  | 33.3% | 0.188 | 4  | 7.8% | 0.309 |
| Metastases at dx                 | No          | 382 | 365 | 95.5% | 17 | 4.5%  |       | 277 | 72.5% | 105 | 27.5% |       | 11 | 2.9% |       |
|                                  | Yes         | 138 | 126 | 91.3% | 12 | 8.7%  | 0.060 | 95  | 68.8% | 43  | 31.2% | 0.413 | 9  | 6.5% | 0.089 |
| Relapse                          | No          | 231 | 218 | 94.4% | 13 | 5.6%  |       | 170 | 73.6% | 61  | 26.4% |       | 10 | 4.3% |       |
|                                  | Yes         | 136 | 126 | 92.6% | 10 | 7.4%  |       | 97  | 71.3% | 39  | 28.7% |       | 5  | 3.7% |       |
|                                  | Progression | 4   | 4   | 100%  | 0  | 0.0%  | 0.703 | 3   | 75.0% | 1   | 25.0% | 0.890 | 0  | 0.0% | 0.817 |
| Percent necrosis at surgery      | Poor, <90%  | 140 | 133 | 95.0% | 7  | 5.0%  |       | 99  | 70.7% | 41  | 29.3% |       | 5  | 3.6% |       |
|                                  | Good, >90%  | 134 | 130 | 97.0% | 4  | 3.0%  | 0.396 | 92  | 68.7% | 42  | 31.3% | 0.711 | 6  | 4.5% | 0.814 |
| Conventional vs. Surface subtype | Conv.       | 342 | 327 | 95.6% | 15 | 4.4%  |       | 238 | 69.6% | 104 | 30.4% |       | 14 | 4.1% |       |
|                                  | Surface     | 22  | 21  | 95.5% | 1  | 4.5%  | 0.970 | 19  | 86.4% | 3   | 13.6% | 0.094 | 0  | 0.0% | 0.491 |

dx, diagnosis; EUR, European ancestry; AFR, African ancestry; ADM, admixed; HIS, Hispanic; ASN, Asian; P, pathogenic; LP, likely pathogenic.

P values for the difference between cases with the specified P/LP variants and cases without these variants using a Chi-Square test.

<sup>†</sup>Not all cases had all variable data, counts (% of total) are given for the cases with these data.

<sup>‡</sup>Includes cases with all pathogenic/likely pathogenic variants, and both AD and AR inheritance gene variants.

<sup>§</sup>Ancestry based on GWAS data.

<sup>¶</sup>Based on the presence of a death date or last known alive date.

**eTable 9.** Pathways Significantly Enriched for 101 Cancer-Susceptibility Genes With 1 or More Pathogenic/Likely Pathogenic Variants in 1004 Patients With Osteosarcoma

| Pathway Source | Pathway Name                                                                        | P-value* | q-value† | N genes |
|----------------|-------------------------------------------------------------------------------------|----------|----------|---------|
| Reactome       | DNA Repair                                                                          | 3.38E-28 | 2.77E-25 | 32      |
| KEGG           | Fanconi anemia pathway                                                              | 1.30E-18 | 1.07E-15 | 14      |
| Reactome       | Resolution of D-loop Structures through Synthesis-Dependent Strand Annealing (SDSA) | 1.72E-15 | 1.41E-12 | 10      |
| KEGG           | Pathways in cancer                                                                  | 1.21E-14 | 9.89E-12 | 23      |
| Reactome       | Resolution of D-Loop Structures                                                     | 4.04E-14 | 3.32E-11 | 10      |
| Reactome       | HDR through Homologous Recombination (HRR)                                          | 6.88E-14 | 5.64E-11 | 12      |
| Reactome       | Transcriptional Regulation by TP53                                                  | 2.00E-13 | 1.64E-10 | 21      |
| KEGG           | MicroRNAs in cancer                                                                 | 2.89E-13 | 2.37E-10 | 15      |
| Reactome       | TP53 Regulates Transcription of DNA Repair Genes                                    | 1.08E-12 | 8.84E-10 | 11      |
| Reactome       | DNA Double-Strand Break Repair                                                      | 1.30E-12 | 1.07E-09 | 15      |
| Reactome       | Resolution of D-loop Structures through Holliday Junction Intermediates             | 1.74E-12 | 1.43E-09 | 9       |
| KEGG           | Homologous recombination                                                            | 9.24E-12 | 7.58E-09 | 9       |
| Reactome       | HDR through Homologous Recombination (HR) or Single Strand Annealing (SSA)          | 1.50E-11 | 1.23E-08 | 13      |
| Reactome       | Homologous DNA Pairing and Strand Exchange                                          | 1.91E-11 | 1.56E-08 | 9       |
| Reactome       | Diseases of Mismatch Repair (MMR)                                                   | 2.17E-11 | 1.78E-08 | 5       |
| Reactome       | Homology Directed Repair                                                            | 2.66E-11 | 2.18E-08 | 13      |
| KEGG           | Endometrial cancer                                                                  | 1.48E-10 | 1.21E-07 | 9       |
| Reactome       | Fanconi Anemia Pathway                                                              | 3.87E-10 | 3.17E-07 | 14      |
| Reactome       | Presynaptic phase of homologous DNA pairing and strand exchange                     | 3.87E-10 | 3.17E-07 | 8       |
| KEGG           | Colorectal cancer                                                                   | 7.68E-10 | 6.30E-07 | 9       |
| Reactome       | Mismatch Repair                                                                     | 7.33E-10 | 6.01E-07 | 6       |

|          |                                                         |          |          |    |
|----------|---------------------------------------------------------|----------|----------|----|
| KEGG     | Central carbon metabolism in cancer                     | 1.57E-09 | 1.29E-06 | 9  |
| Reactome | Cell Cycle                                              | 6.36E-09 | 5.21E-06 | 21 |
| Reactome | HDR through Single Strand Annealing (SSA)               | 9.35E-09 | 7.66E-06 | 7  |
| KEGG     | Breast cancer                                           | 1.15E-08 | 9.44E-06 | 11 |
| KEGG     | Mismatch repair                                         | 1.41E-08 | 1.15E-05 | 6  |
| KEGG     | Prostate cancer                                         | 2.04E-08 | 1.67E-05 | 9  |
| KEGG     | Glioma                                                  | 3.06E-08 | 2.51E-05 | 8  |
| Reactome | Generic Transcription Pathway                           | 4.20E-08 | 3.44E-05 | 24 |
| Reactome | Disease                                                 | 4.64E-08 | 3.81E-05 | 23 |
| Reactome | Mismatch repair (MMR) directed by MSH2:MSH3 (MutSbeta)  | 4.11E-08 | 3.37E-05 | 5  |
| Reactome | Mismatch repair (MMR) directed by MSH2:MSH6 (MutSalpha) | 4.11E-08 | 3.37E-05 | 5  |
| KEGG     | Nucleotide excision repair                              | 4.60E-08 | 3.77E-05 | 7  |
| KEGG     | Melanoma                                                | 5.49E-08 | 4.50E-05 | 8  |
| Reactome | DNA Damage/Telomere Stress Induced Senescence           | 1.28E-07 | 1.05E-04 | 8  |
| Reactome | Telomere Maintenance                                    | 1.56E-07 | 1.28E-04 | 8  |
| KEGG     | Non-small cell lung cancer                              | 1.87E-07 | 1.54E-04 | 7  |
| Reactome | Meiosis                                                 | 2.40E-07 | 1.97E-04 | 9  |

\*Fisher exact test.

†Shown for pathways significant at 0.0002 after Bonferroni correction for multiple tests.

**eTable 10.** Number of Rare Variants by Pathogenicity Score in 1004 Patients With Osteosarcoma and 1062 Individuals Without Cancer for 238 Cancer-Susceptibility Genes and Pathogenic/Likely Pathogenic Variants in 240 Patients in the Replication Set

| Gene                           | Inheritance | P       |         | LP      |         | VUS_D†  |         | VUS_ND  |         | LB      |         | B       |         | Summary of all P + LP Variants |               |              |              |         |         |
|--------------------------------|-------------|---------|---------|---------|---------|---------|---------|---------|---------|---------|---------|---------|---------|--------------------------------|---------------|--------------|--------------|---------|---------|
|                                |             | N Cases | N Ctrls | N Disc. Cases                  | % Disc. Cases | N Rep. Cases | % Rep. Cases | N Ctrls | % Ctrls |
| <b>Autosomal Dominant (AD)</b> |             |         |         |         |         |         |         |         |         |         |         |         |         |                                |               |              |              |         |         |
| <i>AIP</i>                     | AD          |         |         |         |         |         |         | 10      | 19      | 1       | 1       | 0       | 1       |                                |               |              |              |         |         |
| <i>ALK</i>                     | AD          |         |         |         |         | 0       | 5       | 38      | 30      | 6       | 4       | 4       | 2       |                                |               |              |              |         |         |
| <i>ANKR D26</i>                | AD          |         |         |         |         | 2       | 1       | 41      | 34      | 17      | 14      | 10      | 3       |                                |               |              |              |         |         |
| <i>APC</i>                     | AD          |         |         | 3       | 0       | 11      | 11      | 34      | 41      | 22      | 22      | 16      | 16      | 3                              | 0.3           |              |              |         |         |
| <i>ATG2B</i>                   | AD          |         |         |         |         | 3       | 1       | 47      | 51      |         |         |         |         |                                |               |              |              |         |         |
| <i>ATR</i>                     | AD          |         |         |         |         | 1       | 3       | 36      | 36      | 8       | 14      |         |         |                                |               |              |              |         |         |
| <i>AXIN2</i>                   | AD          |         |         | 1       | 0       | 2       | 0       | 19      | 18      | 18      | 19      | 0       | 1       | 1                              | 0.1           |              |              |         |         |
| <i>BAP1</i>                    | AD          |         |         |         |         | 0       | 1       | 9       | 5       | 1       | 1       |         |         |                                |               |              |              |         |         |
| <i>BARD1</i>                   | AD          |         |         | 0       | 1       | 2       | 2       | 6       | 15      | 10      | 10      | 5       | 6       |                                |               |              |              | 1       | 0.1     |
| <i>BMPRI A</i>                 | AD          |         |         |         |         | 0       | 1       | 3       | 7       | 8       | 5       |         |         |                                |               |              |              |         |         |
| <i>BRAF</i>                    | AD          |         |         |         |         |         |         | 12      | 5       | 0       | 1       |         |         |                                |               |              |              |         |         |
| <i>BRCA1</i>                   | AD          | 4       | 0       |         |         | 3       | 2       | 9       | 16      | 22      | 10      | 30      | 21      | 4                              | 0.4           | 1            | 0.4          |         |         |
| <i>CBL</i>                     | AD          |         |         |         |         | 4       | 3       | 5       | 9       | 8       | 11      |         |         |                                |               |              |              |         |         |
| <i>CDC73</i>                   | AD          |         |         |         |         |         |         | 1       | 1       |         |         |         |         |                                |               |              |              |         |         |
| <i>CDHI</i>                    | AD          |         |         |         |         | 4       | 1       | 10      | 9       | 11      | 11      | 17      | 16      |                                |               |              |              |         |         |
| <i>CDK4</i>                    | AD          |         |         |         |         | 1       | 1       | 10      | 11      | 1       | 2       |         |         |                                |               |              |              |         |         |

|               |    |   |   |    |   |   |   |    |    |    |    |    |    |    |     |   |     |   |     |
|---------------|----|---|---|----|---|---|---|----|----|----|----|----|----|----|-----|---|-----|---|-----|
| <i>CDKN1C</i> | AD |   |   |    |   |   |   | 4  | 0  |    |    | 11 | 0  |    |     |   |     |   |     |
| <i>CDKN2A</i> | AD | 1 | 0 | 11 | 0 | 1 | 4 | 2  | 6  | 12 | 7  |    |    | 12 | 1.2 |   |     |   |     |
| <i>CDKN2B</i> | AD |   |   |    |   | 0 | 1 | 5  | 9  |    |    |    |    |    |     |   |     |   |     |
| <i>CEBPA</i>  | AD |   |   |    |   |   |   | 7  | 1  |    |    |    |    |    |     |   |     |   |     |
| <i>CHEK2</i>  | AD | 2 | 0 | 3  | 1 | 2 | 4 | 16 | 17 | 4  | 5  | 2  | 1  | 5  | 0.5 |   |     | 1 | 0.1 |
| <i>CREBBP</i> | AD |   |   | 1  | 0 | 4 | 3 | 30 | 24 | 7  | 15 | 9  | 20 | 1  | 0.1 |   |     |   |     |
| <i>CTR9</i>   | AD |   |   |    |   |   |   | 11 | 19 |    |    |    |    |    |     |   |     |   |     |
| <i>CXCR4</i>  | AD |   |   |    |   |   |   | 2  | 2  | 1  | 0  |    |    |    |     |   |     |   |     |
| <i>CYLD</i>   | AD |   |   | 1  | 0 | 0 | 2 | 6  | 4  | 2  | 3  |    |    | 1  | 0.1 |   |     |   |     |
| <i>DDB2</i>   | AD |   |   |    |   |   |   | 3  | 7  | 12 | 4  |    |    |    |     |   |     |   |     |
| <i>DDX41</i>  | AD |   |   |    |   | 3 | 4 | 9  | 11 | 2  | 2  |    |    |    |     |   |     |   |     |
| <i>DICER1</i> | AD |   |   | 1  | 0 | 1 | 0 | 18 | 10 | 20 | 18 | 6  | 1  | 1  | 0.1 |   |     |   |     |
| <i>EGFR</i>   | AD |   |   | 5  | 0 | 0 | 3 | 18 | 24 | 7  | 3  | 2  | 1  | 5  | 0.5 | 1 | 0.4 |   |     |
| <i>ELANE</i>  | AD |   |   | 1  | 0 | 1 | 0 | 5  | 2  | 1  | 2  |    |    | 1  | 0.1 |   |     |   |     |
| <i>EP300</i>  | AD |   |   |    |   | 5 | 4 | 34 | 38 | 22 | 28 | 13 | 7  |    |     |   |     |   |     |
| <i>EPCAM</i>  | AD |   |   |    |   | 2 | 2 | 10 | 3  | 2  | 4  | 10 | 19 |    |     | 1 | 0.4 |   |     |
| <i>ETV6</i>   | AD |   |   |    |   |   |   | 5  | 5  |    |    |    |    |    |     |   |     |   |     |
| <i>EXT1</i>   | AD |   |   | 0  | 1 | 1 | 3 | 7  | 0  | 1  | 3  | 1  | 0  |    |     |   |     | 1 | 0.1 |
| <i>EXT2</i>   | AD |   |   | 1  | 1 | 7 | 7 | 5  | 8  | 11 | 10 |    |    | 1  | 0.1 |   |     | 1 | 0.1 |
| <i>EZH2</i>   | AD |   |   | 2  | 1 | 1 | 1 | 8  | 7  | 3  | 1  |    |    | 2  | 0.2 |   |     | 1 | 0.1 |
| <i>FAS</i>    | AD |   |   |    |   |   |   | 5  | 12 |    |    |    |    |    |     |   |     |   |     |



|                |    |  |  |   |   |    |   |    |    |     |    |    |    |   |     |   |     |   |     |
|----------------|----|--|--|---|---|----|---|----|----|-----|----|----|----|---|-----|---|-----|---|-----|
| <i>FGFR2</i>   | AD |  |  | 1 | 0 | 2  | 0 | 7  | 7  | 3   | 6  | 1  | 0  | 1 | 0.1 |   |     |   |     |
| <i>FGFR3</i>   | AD |  |  |   |   | 5  | 6 | 6  | 12 | 6   | 6  | 13 | 14 |   |     |   |     |   |     |
| <i>FLCN</i>    | AD |  |  |   |   | 4  | 4 | 10 | 7  | 14  | 16 |    |    |   |     | 1 | 0.4 |   |     |
| <i>FOXE1</i>   | AD |  |  |   |   |    |   | 27 | 24 |     |    |    |    |   |     |   |     |   |     |
| <i>GALNT12</i> | AD |  |  | 1 | 0 | 3  | 2 | 5  | 8  | 6   | 5  |    |    | 1 | 0.1 | 1 | 0.4 |   |     |
| <i>GALNT14</i> | AD |  |  |   |   | 2  | 0 | 16 | 20 | 9   | 9  |    |    |   |     |   |     |   |     |
| <i>GATA2</i>   | AD |  |  |   |   | 8  | 4 | 2  | 1  | 3   | 2  |    |    |   |     |   |     |   |     |
| <i>GJB2</i>    | AD |  |  |   |   | 11 | 8 | 8  | 23 | 10  | 6  |    |    |   |     |   |     |   |     |
| <i>GLI3</i>    | AD |  |  |   |   | 3  | 1 | 21 | 13 | 32  | 21 |    |    |   |     |   |     |   |     |
| <i>GREM1</i>   | AD |  |  |   |   |    |   | 2  | 1  | 7   | 5  |    |    |   |     |   |     |   |     |
| <i>GSKIP</i>   | AD |  |  |   |   | 0  | 2 | 0  | 2  |     |    |    |    |   |     |   |     |   |     |
| <i>HABP2</i>   | AD |  |  |   |   | 6  | 7 | 20 | 28 | 1   | 0  | 3  | 1  |   |     |   |     |   |     |
| <i>HMBS</i>    | AD |  |  | 1 | 0 | 6  | 2 | 9  | 11 | 9   | 3  |    |    | 1 | 0.1 |   |     |   |     |
| <i>HNF1A</i>   | AD |  |  | 1 | 1 | 8  | 8 | 24 | 17 | 1   | 5  |    |    | 1 | 0.1 |   |     | 1 | 0.1 |
| <i>HOXB13</i>  | AD |  |  |   |   | 1  | 1 | 8  | 6  |     |    |    |    |   |     |   |     |   |     |
| <i>HRAS</i>    | AD |  |  |   |   | 0  | 3 | 0  | 2  | 0   | 2  | 10 | 11 |   |     |   |     |   |     |
| <i>IPMK</i>    | AD |  |  |   |   | 0  | 2 | 9  | 11 |     |    |    |    |   |     |   |     |   |     |
| <i>KIT</i>     | AD |  |  |   |   | 0  | 2 | 5  | 11 | 11  | 12 | 5  | 2  |   |     |   |     |   |     |
| <i>KMT2D</i>   | AD |  |  | 0 | 1 | 9  | 6 | 67 | 60 | 124 | 96 | 4  | 8  |   |     |   |     | 1 | 0.1 |
| <i>KRAS</i>    | AD |  |  | 1 | 0 | 1  | 1 | 1  | 4  | 3   | 2  | 0  | 2  | 1 | 0.1 |   |     |   |     |
| <i>LMO1</i>    | AD |  |  |   |   | 2  | 2 | 1  | 2  |     |    |    |    |   |     |   |     |   |     |

|               |    |   |   |   |   |    |    |    |    |    |    |    |    |   |     |   |     |   |     |
|---------------|----|---|---|---|---|----|----|----|----|----|----|----|----|---|-----|---|-----|---|-----|
| <i>LZTR1</i>  | AD |   |   | 2 | 0 | 5  | 3  | 17 | 13 | 1  | 1  |    |    | 2 | 0.2 |   |     |   |     |
| <i>MAP2K1</i> | AD |   |   |   |   |    |    | 4  | 0  | 1  | 1  |    |    |   |     | 1 | 0.4 |   |     |
| <i>MAP2K2</i> | AD |   |   |   |   | 3  | 3  | 2  | 2  | 2  | 6  | 4  | 1  |   |     |   |     |   |     |
| <i>MAX</i>    | AD |   |   |   |   |    |    | 2  | 7  | 3  | 3  |    |    |   |     |   |     |   |     |
| <i>MC1R</i>   | AD |   |   | 1 | 0 | 4  | 5  | 32 | 24 | 11 | 8  | 1  | 0  | 1 | 0.1 |   |     |   |     |
| <i>MEN1</i>   | AD | 1 | 0 | 4 | 0 | 1  | 1  | 4  | 1  | 3  | 0  | 7  | 7  | 5 | 0.5 | 1 | 0.4 |   |     |
| <i>MET</i>    | AD |   |   | 1 | 0 | 0  | 7  | 18 | 26 | 20 | 19 | 1  | 2  | 1 | 0.1 |   |     |   |     |
| <i>MITF</i>   | AD |   |   |   |   | 2  | 1  | 23 | 12 |    |    |    |    |   |     | 1 | 0.4 |   |     |
| <i>MTAP</i>   | AD |   |   | 0 | 1 | 5  | 2  | 7  | 6  | 3  | 3  |    |    |   |     |   |     | 1 | 0.1 |
| <i>NF1</i>    | AD |   |   | 1 | 0 | 1  | 3  | 29 | 24 | 13 | 18 | 10 | 14 | 1 | 0.1 | 2 | 0.8 |   |     |
| <i>NF2</i>    | AD | 1 | 0 | 1 | 0 | 5  | 3  | 5  | 8  | 3  | 0  | 2  | 3  | 2 | 0.2 |   |     |   |     |
| <i>NFIX</i>   | AD |   |   |   |   |    |    | 1  | 4  | 1  | 1  |    |    |   |     |   |     |   |     |
| <i>NKX2-1</i> | AD |   |   |   |   | 1  | 0  | 9  | 5  | 1  | 0  |    |    |   |     |   |     |   |     |
| <i>NOTCH3</i> | AD |   |   |   |   | 12 | 18 | 43 | 38 | 11 | 7  |    |    |   |     |   |     |   |     |
| <i>NRAS</i>   | AD |   |   |   |   |    |    | 3  | 2  | 2  | 4  |    |    |   |     |   |     |   |     |
| <i>NSD1</i>   | AD |   |   |   |   | 2  | 2  | 45 | 25 | 19 | 9  | 6  | 8  |   |     |   |     |   |     |
| <i>NTHL1</i>  | AD |   |   |   |   | 3  | 2  | 17 | 21 | 3  | 0  |    |    |   |     |   |     |   |     |
| <i>PAX5</i>   | AD |   |   |   |   | 2  | 2  | 6  | 5  | 2  | 4  |    |    |   |     |   |     |   |     |
| <i>PAX6</i>   | AD |   |   |   |   | 0  | 1  |    |    | 1  | 5  |    |    |   |     |   |     |   |     |
| <i>PBRM1</i>  | AD |   |   |   |   | 4  | 1  | 20 | 27 | 1  | 0  |    |    |   |     |   |     |   |     |
| <i>PDGFRA</i> | AD |   |   |   |   | 0  | 4  | 24 | 29 | 14 | 15 | 1  | 1  |   |     |   |     |   |     |

|                |    |   |   |   |   |   |   |    |    |    |    |   |    |   |     |  |  |   |     |
|----------------|----|---|---|---|---|---|---|----|----|----|----|---|----|---|-----|--|--|---|-----|
| <i>PDGFRB</i>  | AD |   |   | 0 | 1 | 2 | 1 | 25 | 20 | 13 | 5  | 7 | 10 |   |     |  |  | 1 | 0.1 |
| <i>PHOX2B</i>  | AD |   |   |   |   | 0 | 1 | 7  | 6  | 17 | 6  | 5 | 1  |   |     |  |  |   |     |
| <i>PMS1</i>    | AD |   |   | 1 | 1 | 5 | 5 | 37 | 37 |    |    |   |    | 1 | 0.1 |  |  | 1 | 0.1 |
| <i>POLD1</i>   | AD |   |   | 1 | 0 | 0 | 1 | 22 | 30 | 12 | 10 | 9 | 13 | 1 | 0.1 |  |  |   |     |
| <i>PPOX</i>    | AD |   |   |   |   | 2 | 1 | 6  | 9  | 1  | 1  |   |    |   |     |  |  |   |     |
| <i>PRKAR1A</i> | AD |   |   | 2 | 0 | 1 | 0 | 4  | 13 | 2  | 4  |   |    | 2 | 0.2 |  |  |   |     |
| <i>PRSSI</i>   | AD |   |   |   |   | 2 | 7 | 18 | 27 |    |    | 0 | 1  |   |     |  |  |   |     |
| <i>PTCH1</i>   | AD |   |   | 2 | 0 | 7 | 5 | 19 | 13 | 12 | 18 | 7 | 6  | 2 | 0.2 |  |  |   |     |
| <i>PTCH2</i>   | AD |   |   |   |   | 8 | 8 | 13 | 6  | 5  | 8  | 8 | 7  |   |     |  |  |   |     |
| <i>PTEN</i>    | AD |   |   | 1 | 0 | 1 | 1 | 2  | 2  | 0  | 2  |   |    | 1 | 0.1 |  |  |   |     |
| <i>PTPN11</i>  | AD | 0 | 1 |   |   | 1 | 2 | 1  | 7  | 5  | 2  |   |    |   |     |  |  | 1 | 0.1 |
| <i>RAD51D</i>  | AD | 2 | 0 |   |   | 0 | 1 | 9  | 12 | 8  | 9  | 5 | 1  | 2 | 0.2 |  |  |   |     |
| <i>RAF1</i>    | AD |   |   | 1 | 0 | 3 | 1 | 10 | 22 | 2  | 3  | 2 | 0  | 1 | 0.1 |  |  |   |     |
| <i>RBI</i>     | AD | 2 | 0 | 2 | 0 | 7 | 2 | 9  | 6  | 10 | 9  | 1 | 1  | 4 | 0.4 |  |  |   |     |
| <i>REST</i>    | AD |   |   | 0 | 1 | 0 | 1 | 15 | 32 | 4  | 4  | 6 | 12 |   |     |  |  | 1 | 0.1 |
| <i>RET</i>     | AD |   |   |   |   | 9 | 5 | 15 | 12 | 13 | 10 | 1 | 0  |   |     |  |  |   |     |
| <i>RHBD F2</i> | AD |   |   |   |   | 0 | 0 | 24 | 17 | 6  | 6  |   |    |   |     |  |  |   |     |
| <i>RPL11</i>   | AD |   |   |   |   | 0 | 1 | 2  | 1  | 1  | 0  |   |    |   |     |  |  |   |     |
| <i>RPL15</i>   | AD |   |   |   |   | 1 | 0 | 1  | 5  |    |    |   |    |   |     |  |  |   |     |
| <i>RPL26</i>   | AD |   |   |   |   | 0 | 1 | 1  | 0  |    |    |   |    |   |     |  |  |   |     |
| <i>RPL27</i>   | AD |   |   |   |   |   |   | 3  | 1  |    |    |   |    |   |     |  |  |   |     |

|                 |    |  |  |   |   |    |   |    |    |   |   |   |   |   |     |   |     |   |     |
|-----------------|----|--|--|---|---|----|---|----|----|---|---|---|---|---|-----|---|-----|---|-----|
| <i>RPL31</i>    | AD |  |  |   |   |    |   | 2  | 6  |   |   |   |   |   |     |   |     |   |     |
| <i>RPL35 A</i>  | AD |  |  | 1 | 0 |    |   | 0  | 1  | 2 | 0 |   |   | 1 | 0.1 |   |     |   |     |
| <i>RPL5</i>     | AD |  |  | 1 | 1 |    |   | 6  | 1  | 4 | 5 |   |   | 1 | 0.1 | 1 | 0.4 | 1 | 0.1 |
| <i>RPS10</i>    | AD |  |  |   |   | 0  | 2 | 2  | 1  | 0 | 1 |   |   |   |     |   |     |   |     |
| <i>RPS19</i>    | AD |  |  | 1 | 0 |    |   | 14 | 11 |   |   |   |   | 1 | 0.1 |   |     |   |     |
| <i>RPS24</i>    | AD |  |  |   |   |    |   | 6  | 6  | 1 | 4 |   |   |   |     |   |     |   |     |
| <i>RPS26</i>    | AD |  |  |   |   | 0  | 1 |    |    | 1 | 0 |   |   |   |     |   |     |   |     |
| <i>RPS27</i>    | AD |  |  |   |   |    |   | 2  | 1  |   |   |   |   |   |     |   |     |   |     |
| <i>RPS29</i>    | AD |  |  |   |   | 1  | 2 | 1  | 0  |   |   |   |   |   |     |   |     |   |     |
| <i>RPS7</i>     | AD |  |  | 1 | 0 | 1  | 1 | 1  | 1  |   |   |   |   | 1 | 0.1 |   |     |   |     |
| <i>RUNX1</i>    | AD |  |  |   |   | 0  | 2 | 4  | 2  | 3 | 2 |   |   |   |     | 1 | 0.4 |   |     |
| <i>SAMD9</i>    | AD |  |  | 1 | 2 | 5  | 5 | 35 | 38 |   |   |   |   | 1 | 0.1 |   |     | 2 | 0.2 |
| <i>SAMD9 L</i>  | AD |  |  |   |   | 3  | 4 | 23 | 25 |   |   |   |   |   |     |   |     |   |     |
| <i>SDHAF 2</i>  | AD |  |  |   |   | 0  | 1 | 0  | 1  | 2 | 1 |   |   |   |     |   |     |   |     |
| <i>SDHB</i>     | AD |  |  |   |   | 2  | 4 | 0  | 1  | 1 | 0 |   |   |   |     |   |     |   |     |
| <i>SDHC</i>     | AD |  |  |   |   | 1  | 0 | 6  | 12 | 1 | 1 |   |   |   |     |   |     |   |     |
| <i>SDHD</i>     | AD |  |  |   |   | 0  | 2 | 5  | 3  |   |   |   |   |   |     |   |     |   |     |
| <i>SH2B3</i>    | AD |  |  |   |   | 12 | 4 | 24 | 18 |   |   |   |   |   |     |   |     |   |     |
| <i>SHOC2</i>    | AD |  |  |   |   |    |   | 4  | 2  |   |   | 2 | 0 |   |     |   |     |   |     |
| <i>SMAD4</i>    | AD |  |  |   |   |    |   | 3  | 2  | 8 | 1 |   |   |   |     |   |     |   |     |
| <i>SMARC A4</i> | AD |  |  |   |   | 2  | 3 | 17 | 12 | 7 | 1 |   |   |   |     |   |     |   |     |

|                |       |    |   |    |   |    |   |    |    |    |    |    |    |    |     |    |     |   |     |
|----------------|-------|----|---|----|---|----|---|----|----|----|----|----|----|----|-----|----|-----|---|-----|
| <i>SMARCB1</i> | AD    |    |   |    |   |    |   | 1  | 1  | 2  | 4  | 5  | 0  |    |     |    |     |   |     |
| <i>SMARCE1</i> | AD    |    |   |    |   |    |   | 18 | 17 |    |    |    |    |    |     |    |     |   |     |
| <i>SMO</i>     | AD    |    |   | 6  | 3 | 0  | 3 | 38 | 20 |    |    |    |    | 6  | 0.6 |    |     | 3 | 0.3 |
| <i>SOS1</i>    | AD    |    |   | 2  | 0 | 0  | 1 | 7  | 12 | 5  | 10 | 7  | 10 | 2  | 0.2 |    |     |   |     |
| <i>SOS2</i>    | AD    |    |   |    |   | 2  | 0 | 11 | 11 | 3  | 2  | 3  | 2  |    |     |    |     |   |     |
| <i>SRP72</i>   | AD    |    |   |    |   |    |   | 6  | 10 | 12 | 6  |    |    |    |     |    |     |   |     |
| <i>STAT3</i>   | AD    |    |   |    |   | 0  | 1 | 12 | 14 | 2  | 0  |    |    |    |     |    |     |   |     |
| <i>STK11</i>   | AD    |    |   |    |   | 0  | 1 | 35 | 34 | 5  | 7  | 1  | 2  |    |     |    |     |   |     |
| <i>SUFU</i>    | AD    |    |   | 0  | 1 | 1  | 0 | 8  | 7  | 7  | 9  | 1  | 0  |    |     |    |     | 1 | 0.1 |
| <i>T</i>       | AD    |    |   |    |   | 1  | 0 | 5  | 7  | 0  | 2  |    |    |    |     |    |     |   |     |
| <i>TGFBR1</i>  | AD    |    |   |    |   | 2  | 4 | 1  | 4  | 10 | 8  | 5  | 7  |    |     |    |     |   |     |
| <i>TGFBR2</i>  | AD    |    |   |    |   | 3  | 2 | 0  | 4  | 12 | 10 | 3  | 5  |    |     |    |     |   |     |
| <i>TMEM127</i> | AD    |    |   |    |   | 3  | 1 | 1  | 0  | 1  | 0  |    |    |    |     |    |     |   |     |
| <i>TP53</i>    | AD    | 25 | 0 | 19 | 3 | 1  | 1 | 0  | 3  | 3  | 1  |    |    | 44 | 4.4 | 13 | 5.4 | 3 | 0.3 |
| <i>TP63</i>    | AD    |    |   | 6  | 2 | 1  | 2 | 7  | 3  |    |    |    |    | 6  | 0.6 | 2  | 0.8 | 2 | 0.2 |
| <i>TSC1</i>    | AD    |    |   |    |   | 2  | 0 | 7  | 7  | 10 | 16 | 16 | 18 |    |     |    |     |   |     |
| <i>TSC2</i>    | AD    |    |   | 3  | 0 | 10 | 6 | 21 | 16 | 41 | 50 | 15 | 26 | 3  | 0.3 | 1  | 0.4 |   |     |
| <i>TSHR</i>    | AD    |    |   | 0  | 1 | 1  | 7 | 22 | 20 | 0  | 1  |    |    |    |     | 1  | 0.4 | 1 | 0.1 |
| <i>VHL</i>     | AD    | 1  | 0 | 3  | 0 | 2  | 1 | 1  | 3  |    |    | 0  | 3  | 4  | 0.4 |    |     |   |     |
| <i>WT1</i>     | AD    |    |   |    |   |    |   | 9  | 8  | 15 | 7  |    |    |    |     |    |     |   |     |
| <i>ACD</i>     | AD/AR |    |   | 1  | 0 |    |   | 11 | 22 |    |    |    |    | 1  | 0.1 |    |     |   |     |

|               |       |   |   |   |   |    |    |    |     |    |    |    |    |   |     |   |     |   |     |
|---------------|-------|---|---|---|---|----|----|----|-----|----|----|----|----|---|-----|---|-----|---|-----|
| <i>ATM</i>    | AD/AR | 4 | 3 | 1 | 0 | 11 | 11 | 42 | 46  | 48 | 46 | 34 | 49 | 5 | 0.5 | 1 | 0.4 | 3 | 0.3 |
| <i>BRC42</i>  | AD/AR | 8 | 5 | 1 | 1 | 4  | 7  | 27 | 16  | 59 | 47 | 52 | 52 | 9 | 0.9 | 2 | 0.8 | 6 | 0.6 |
| <i>BRIP1</i>  | AD/AR | 1 | 2 | 0 | 1 | 0  | 6  | 12 | 8   | 22 | 23 | 3  | 4  | 1 | 0.1 |   |     | 3 | 0.3 |
| <i>CDKN1B</i> | AD/AR |   |   |   |   | 2  | 3  | 6  | 13  | 2  | 3  |    |    |   |     |   |     |   |     |
| <i>COL7A1</i> | AD/AR | 1 | 3 | 4 | 1 | 16 | 13 | 88 | 106 | 17 | 21 |    |    | 5 | 0.5 |   |     | 4 | 0.4 |
| <i>FANCM</i>  | AD/AR | 1 | 0 | 4 | 2 | 1  | 3  | 44 | 38  | 15 | 22 | 1  | 0  | 5 | 0.5 |   |     | 2 | 0.2 |
| <i>FH</i>     | AD/AR | 2 | 0 |   |   | 0  | 4  | 4  | 3   | 0  | 1  |    |    | 2 | 0.2 |   |     |   |     |
| <i>MLH1</i>   | AD/AR | 1 | 0 | 1 | 0 | 10 | 7  | 7  | 4   | 22 | 24 | 11 | 10 | 2 | 0.2 |   |     |   |     |
| <i>MPL</i>    | AD/AR | 4 | 1 | 1 | 2 | 0  | 3  | 7  | 8   | 2  | 2  | 0  | 1  | 5 | 0.5 | 3 | 1.3 | 3 | 0.3 |
| <i>MRE11A</i> | AD/AR |   |   | 1 | 0 | 8  | 1  | 5  | 13  | 7  | 3  |    |    | 1 | 0.1 |   |     |   |     |
| <i>MSH2</i>   | AD/AR |   |   | 4 | 0 | 3  | 9  | 5  | 3   | 7  | 11 | 20 | 18 | 4 | 0.4 | 1 | 0.4 |   |     |
| <i>MSH6</i>   | AD/AR |   |   | 1 | 1 | 5  | 8  | 23 | 11  | 9  | 10 | 7  | 7  | 1 | 0.1 | 2 | 0.8 | 1 | 0.1 |
| <i>NHP2</i>   | AD/AR |   |   | 1 | 1 | 0  | 1  | 9  | 10  | 1  | 2  |    |    | 1 | 0.1 |   |     | 1 | 0.1 |
| <i>PALB2</i>  | AD/AR | 3 | 1 |   |   |    |    | 20 | 13  | 12 | 11 | 8  | 7  | 3 | 0.3 |   |     | 1 | 0.1 |
| <i>PARN</i>   | AD/AR |   |   |   |   |    |    | 33 | 55  | 2  | 1  |    |    |   |     |   |     |   |     |
| <i>PMS2</i>   | AD/AR | 1 | 1 | 1 | 0 | 6  | 7  | 18 | 17  | 12 | 14 | 7  | 7  | 2 | 0.2 |   |     | 1 | 0.1 |
| <i>POLE</i>   | AD/AR |   |   | 4 | 2 | 1  | 1  | 53 | 58  | 12 | 12 | 5  | 1  | 4 | 0.4 |   |     | 2 | 0.2 |
| <i>POT1</i>   | AD/AR | 1 | 0 | 5 | 0 | 0  | 2  | 7  | 3   | 8  | 12 | 2  | 0  | 6 | 0.6 |   |     |   |     |
| <i>RAD51C</i> | AD/AR |   |   |   |   | 1  | 0  | 2  | 4   | 2  | 0  | 5  | 7  |   |     |   |     |   |     |
| <i>RTEL1</i>  | AD/AR | 0 | 3 | 2 | 0 | 3  | 1  | 72 | 52  | 11 | 16 |    |    | 2 | 0.2 | 1 | 0.4 | 3 | 0.3 |
| <i>SDHA</i>   | AD/AR | 1 | 0 | 0 | 1 | 4  | 8  | 24 | 32  | 10 | 13 |    |    | 1 | 0.1 |   |     | 1 | 0.1 |

|                                 |       |    |    |     |    |     |     |      |      |      |      |     |     |     |      |    |      |    |     |
|---------------------------------|-------|----|----|-----|----|-----|-----|------|------|------|------|-----|-----|-----|------|----|------|----|-----|
| <i>TERT</i>                     | AD/AR |    |    | 3   | 0  | 3   | 3   | 11   | 7    | 6    | 9    |     |     | 3   | 0.3  |    |      |    |     |
| <i>TINF2</i>                    | AD/AR |    |    | 1   | 0  | 2   | 2   | 5    | 3    | 12   | 14   |     |     | 1   | 0.1  |    |      |    |     |
| <i>UROD</i>                     | AD/AR |    |    | 0   | 1  | 1   | 1   | 3    | 4    |      |      |     |     |     |      |    |      | 1  | 0.1 |
| AD/AR<br>Total                  |       | 67 | 20 | 135 | 37 | 368 | 395 | 2205 | 2237 | 1161 | 1093 | 468 | 477 | 202 | 20.1 | 39 | 16.3 | 57 | 5.4 |
| <b>Autosomal Recessive (AR)</b> |       |    |    |     |    |     |     |      |      |      |      |     |     |     |      |    |      |    |     |
| <i>ABCB1<br/>1</i>              | AR    | 1  | 0  | 2   | 3  | 6   | 7   | 27   | 22   | 5    | 6    | 0   | 1   | 3   | 0.3  | 2  | 0.8  | 3  | 0.3 |
| <i>AGL</i>                      | AR    |    |    | 2   | 1  | 11  | 6   | 24   | 24   | 4    | 7    | 8   | 13  | 2   | 0.2  |    |      | 1  | 0.1 |
| <i>APOBE<br/>C3B</i>            | AR    |    |    |     |    | 1   | 0   | 20   | 13   | 2    | 1    |     |     |     |      |    |      |    |     |
| <i>BLM</i>                      | AR    | 0  | 3  |     |    | 1   | 2   | 24   | 25   | 31   | 21   | 15  | 21  |     |      |    |      | 3  | 0.3 |
| <i>BUB1B</i>                    | AR    |    |    | 1   | 1  | 2   | 3   | 38   | 35   | 1    | 0    |     |     | 1   | 0.1  |    |      | 1  | 0.1 |
| <i>CEP57</i>                    | AR    |    |    |     |    | 4   | 0   | 10   | 12   | 6    | 0    |     |     |     |      |    |      |    |     |
| <i>CTCF</i>                     | AR    | 1  | 2  | 0   | 2  | 6   | 3   | 33   | 21   | 7    | 3    | 3   | 2   | 1   | 0.1  |    |      | 4  | 0.4 |
| <i>DHCR7</i>                    | AR    | 1  | 1  | 5   | 2  | 5   | 1   | 33   | 28   | 4    | 5    | 1   | 1   | 6   | 0.6  |    |      | 3  | 0.3 |
| <i>DIS3L2</i>                   | AR    |    |    | 4   | 1  | 0   | 2   | 35   | 41   | 4    | 5    | 3   | 3   | 4   | 0.4  |    |      | 1  | 0.1 |
| <i>DOCK<br/>8</i>               | AR    | 1  | 1  |     |    | 0   | 1   | 63   | 96   | 22   | 18   | 3   | 0   | 1   | 0.1  |    |      | 1  | 0.1 |
| <i>ERCC1</i>                    | AR    |    |    |     |    | 3   | 7   | 3    | 7    |      |      |     |     |     |      |    |      |    |     |
| <i>ERCC2</i>                    | AR    |    |    | 17  | 6  | 0   | 1   | 14   | 19   |      |      |     |     | 17  | 1.7  | 3  | 1.3  | 6  | 0.6 |
| <i>ERCC3</i>                    | AR    | 0  | 1  | 2   | 3  | 4   | 1   | 19   | 18   |      |      |     |     | 2   | 0.2  |    |      | 4  | 0.4 |
| <i>ERCC4</i>                    | AR    |    |    | 2   | 0  | 7   | 6   | 47   | 30   | 4    | 2    | 6   | 4   | 2   | 0.2  | 1  | 0.4  |    |     |
| <i>ERCC5</i>                    | AR    |    |    | 1   | 4  | 0   | 1   | 62   | 54   |      |      | 2   | 8   | 1   | 0.1  | 2  | 0.8  | 4  | 0.4 |
| <i>FAH</i>                      | AR    | 2  | 0  | 1   | 0  | 8   | 8   | 4    | 1    |      |      |     |     | 3   | 0.3  | 4  | 1.7  |    |     |
| <i>FANCA</i>                    | AR    | 0  | 4  | 3   | 2  | 11  | 10  | 48   | 71   | 6    | 14   | 4   | 0   | 3   | 0.3  | 5  | 2.1  | 6  | 0.6 |

|                 |    |   |   |   |   |    |    |    |    |    |    |    |    |   |     |   |     |   |     |
|-----------------|----|---|---|---|---|----|----|----|----|----|----|----|----|---|-----|---|-----|---|-----|
| <i>FANCC</i>    | AR | 1 | 1 | 1 | 0 |    |    | 5  | 8  | 5  | 7  | 1  | 3  | 2 | 0.2 |   |     | 1 | 0.1 |
| <i>FANCD2</i>   | AR | 3 | 0 | 0 | 1 |    |    | 46 | 40 | 13 | 14 |    |    | 3 | 0.3 |   |     | 1 | 0.1 |
| <i>FANCE</i>    | AR | 2 | 0 | 0 | 1 |    |    | 10 | 11 | 0  | 2  | 2  | 2  | 2 | 0.2 |   |     | 1 | 0.1 |
| <i>FANCF</i>    | AR |   |   |   |   |    |    | 9  | 5  | 2  | 0  | 0  | 1  |   |     |   |     |   |     |
| <i>FANCG</i>    | AR | 0 | 1 | 1 | 1 |    |    | 12 | 7  | 3  | 5  |    |    | 1 | 0.1 |   |     | 2 | 0.2 |
| <i>FANCI</i>    | AR | 0 | 1 | 0 | 2 | 5  | 8  | 20 | 19 | 7  | 10 | 14 | 9  |   |     |   |     | 3 | 0.3 |
| <i>FANCL</i>    | AR |   |   | 1 | 4 | 1  | 0  | 18 | 12 | 6  | 13 | 1  | 0  | 1 | 0.1 |   |     | 4 | 0.4 |
| <i>G6PC</i>     | AR | 1 | 0 | 3 | 5 | 0  | 1  | 9  | 9  | 0  | 1  |    |    | 4 | 0.4 | 1 | 0.4 | 5 | 0.5 |
| <i>GBA</i>      | AR | 1 | 0 | 1 | 1 | 6  | 10 | 3  | 2  | 1  | 4  |    |    | 2 | 0.2 | 1 | 0.4 | 1 | 0.1 |
| <i>HFE</i>      | AR |   |   | 1 | 0 | 7  | 5  | 5  | 2  | 2  | 0  |    |    | 1 | 0.1 |   |     |   |     |
| <i>ITK</i>      | AR |   |   |   |   | 5  | 3  | 10 | 12 | 1  | 1  |    |    |   |     |   |     |   |     |
| <i>L2HGDH</i>   | AR |   |   |   |   | 3  | 1  | 9  | 12 | 0  | 1  |    |    |   |     |   |     |   |     |
| <i>MSH3</i>     | AR |   |   | 1 | 0 | 7  | 8  | 15 | 19 | 21 | 13 |    |    | 1 | 0.1 |   |     |   |     |
| <i>MUTYH</i>    | AR | 4 | 1 | 0 | 1 | 7  | 16 | 18 | 11 | 12 | 7  | 0  | 4  | 4 | 0.4 | 1 | 0.4 | 2 | 0.2 |
| <i>NBN</i>      | AR | 2 | 0 | 1 | 1 | 5  | 7  | 18 | 17 | 9  | 5  | 2  | 5  | 3 | 0.3 |   |     | 1 | 0.1 |
| <i>NTRK1</i>    | AR |   |   | 1 | 0 | 9  | 7  | 20 | 23 | 6  | 15 |    |    | 1 | 0.1 |   |     |   |     |
| <i>POLH</i>     | AR |   |   |   |   | 1  | 2  | 11 | 18 | 12 | 15 |    |    |   |     | 1 | 0.4 |   |     |
| <i>PRF1</i>     | AR | 1 | 1 | 3 | 1 | 5  | 4  | 23 | 20 | 2  | 2  | 1  | 1  | 4 | 0.4 |   |     | 2 | 0.2 |
| <i>RECQL4</i>   | AR | 3 | 1 | 5 | 0 | 2  | 0  | 49 | 65 | 22 | 17 | 16 | 12 | 8 | 0.8 | 2 | 0.8 | 1 | 0.1 |
| <i>SBDS</i>     | AR | 2 | 1 | 0 | 1 | 10 | 14 | 1  | 1  | 3  | 7  |    |    | 2 | 0.2 |   |     | 2 | 0.2 |
| <i>SERPINA1</i> | AR | 1 | 0 | 4 | 7 | 10 | 12 | 13 | 12 | 3  | 1  | 3  | 6  | 5 | 0.5 | 1 | 0.4 | 7 | 0.7 |



|                          |          |    |    |    |    |     |     |     |     |     |     |     |     |    |     |    |      |    |     |
|--------------------------|----------|----|----|----|----|-----|-----|-----|-----|-----|-----|-----|-----|----|-----|----|------|----|-----|
| <i>SLC25A13</i>          | AR       | 1  | 0  |    |    | 3   | 4   | 10  | 11  | 1   | 0   |     |     | 1  | 0.1 |    |      |    |     |
| <i>SLX4</i>              | AR       |    |    |    |    | 2   | 5   | 55  | 34  | 36  | 34  | 3   | 3   |    |     |    |      |    |     |
| <i>TRIM7</i>             | AR       | 0  | 1  | 1  | 0  | 0   | 1   | 13  | 15  | 0   | 1   |     |     | 1  | 0.1 |    |      | 1  | 0.1 |
| <i>WRAP53</i>            | AR       |    |    |    |    | 1   | 2   | 12  | 11  | 1   | 0   |     |     |    |     |    |      |    |     |
| <i>WRN</i>               | AR       |    |    | 5  | 4  | 4   | 1   | 25  | 29  | 13  | 18  | 34  | 47  | 5  | 0.5 | 3  | 1.3  | 4  | 0.4 |
| <i>XPA</i>               | AR       |    |    |    |    | 0   | 1   | 4   | 1   | 2   | 0   |     |     |    |     |    |      |    |     |
| <i>XPC</i>               | AR       | 1  | 0  | 0  | 1  |     |     | 17  | 10  | 10  | 6   |     |     | 1  | 0.1 |    |      | 1  | 0.1 |
| AR Total                 |          | 29 | 20 | 69 | 56 | 162 | 171 | 964 | 953 | 289 | 281 | 122 | 146 | 98 | 9.8 | 27 | 11.3 | 76 | 7.2 |
| <b>X-linked/Y-linked</b> |          |    |    |    |    |     |     |     |     |     |     |     |     |    |     |    |      |    |     |
| <i>AR</i>                | X-linked |    |    |    |    | 2   | 6   | 28  | 15  | 3   | 2   | 3   | 1   |    |     |    |      |    |     |
| <i>DKC1</i>              | X-linked | 1  | 0  |    |    |     |     | 23  | 12  | 0   | 1   |     |     | 1  | 0.1 | 1  | 0.4  |    |     |
| <i>FANCB</i>             | X-linked |    |    |    |    |     |     | 4   | 7   | 6   | 7   | 2   | 1   |    |     |    |      |    |     |
| <i>FMRI</i>              | X-linked |    |    |    |    |     |     | 3   | 1   | 0   | 1   | 4   | 6   |    |     |    |      |    |     |
| <i>GATA1</i>             | X-linked |    |    |    |    |     |     | 2   | 6   | 0   | 2   | 3   | 2   |    |     |    |      |    |     |
| <i>GPC3</i>              | X-linked |    |    | 1  | 0  |     |     | 17  | 10  | 1   | 2   |     |     | 1  | 0.1 |    |      |    |     |
| <i>GPC4</i>              | X-linked |    |    |    |    |     |     | 4   | 6   |     |     |     |     |    |     |    |      |    |     |
| <i>PHF6</i>              | X-linked |    |    |    |    |     |     | 2   | 1   |     |     |     |     |    |     |    |      |    |     |
| <i>SH2D1A</i>            | X-linked |    |    |    |    |     |     | 0   | 1   | 5   | 4   |     |     |    |     |    |      |    |     |
| <i>SRY</i>               | Y-linked |    |    |    |    |     |     | 1   | 0   |     |     |     |     |    |     |    |      |    |     |
| <i>TSR2</i>              | X-linked |    |    |    |    |     |     | 1   | 0   |     |     |     |     |    |     |    |      |    |     |
| <i>WAS</i>               | X-linked |    |    | 2  | 0  | 1   | 1   | 4   | 4   | 2   | 4   |     |     | 2  | 0.2 | 1  | 0.4  |    |     |

|                           |                |   |   |   |   |    |    |     |     |    |    |    |    |   |     |   |     |   |     |
|---------------------------|----------------|---|---|---|---|----|----|-----|-----|----|----|----|----|---|-----|---|-----|---|-----|
| X/Y-linked Total          |                | 1 | 0 | 3 | 0 | 3  | 7  | 89  | 63  | 17 | 23 | 12 | 10 | 4 | 0.4 | 2 | 0.8 |   |     |
| <b>De Novo or Unknown</b> |                |   |   |   |   |    |    |     |     |    |    |    |    |   |     |   |     |   |     |
| <i>ASXL1</i>              | de novo or unk |   |   |   |   | 0  | 4  | 24  | 16  | 24 | 25 |    |    |   |     |   |     |   |     |
| <i>ERBB4</i>              | de novo or unk |   |   |   |   | 2  | 2  | 15  | 20  |    |    |    |    |   |     |   |     |   |     |
| <i>FAT1</i>               | de novo or unk |   |   |   |   | 18 | 10 | 162 | 183 | 6  | 5  | 1  | 0  |   |     |   |     |   |     |
| <i>GNAS</i>               | de novo or unk |   |   |   |   | 3  | 3  | 42  | 45  |    |    |    |    |   |     |   |     |   |     |
| <i>IDH1</i>               | de novo or unk |   |   | 2 | 2 | 1  | 2  | 4   | 14  | 3  | 3  |    |    | 2 | 0.2 | 1 | 0.4 | 2 | 0.2 |
| <i>IDH2</i>               | de novo or unk |   |   |   |   | 4  | 0  | 6   | 4   | 12 | 6  |    |    |   |     |   |     |   |     |
| <i>IKZF1</i>              | de novo or unk |   |   |   |   | 0  | 1  | 5   | 9   | 2  | 2  | 0  | 1  |   |     |   |     |   |     |
| <i>PTPN13</i>             | de novo or unk |   |   |   |   | 2  | 7  | 108 | 90  | 6  | 9  | 19 | 10 |   |     |   |     |   |     |
| <i>RAD51</i>              | de novo or unk |   |   |   |   | 2  | 1  | 4   | 3   |    |    |    |    |   |     |   |     |   |     |
| <i>SETBP1</i>             | de novo or unk |   |   |   |   | 1  | 1  | 32  | 35  | 4  | 15 |    |    |   |     |   |     |   |     |
| <i>SMARCA2</i>            | de novo or unk |   |   | 1 | 0 | 2  | 3  | 9   | 23  | 18 | 15 |    |    | 1 | 0.1 |   |     |   |     |
| <i>SPOP</i>               | de novo or unk |   |   |   |   | 1  | 0  | 3   | 0   | 0  | 2  |    |    |   |     | 1 | 0.4 |   |     |
| <i>SPRTN</i>              | de novo or unk |   |   |   |   | 0  | 1  | 5   | 6   | 0  | 1  |    |    |   |     |   |     |   |     |

|                     |                |           |           |            |           |            |            |             |             |             |             |            |            |            |             |           |             |            |             |
|---------------------|----------------|-----------|-----------|------------|-----------|------------|------------|-------------|-------------|-------------|-------------|------------|------------|------------|-------------|-----------|-------------|------------|-------------|
| <i>TFAP2A</i>       | de novo or unk |           |           | 0          | 1         | 1          | 0          | 1           | 2           | 1           | 2           |            |            |            |             | 1         | 0.4         | 1          | 0.1         |
| <i>XRCC3</i>        | de novo or unk |           |           |            |           |            |            | 7           | 5           | 1           | 0           |            |            |            |             |           |             |            |             |
| Unk Total           |                | 0         | 0         | 3          | 3         | 37         | 35         | 427         | 455         | 77          | 85          | 20         | 11         | 3          | 0.3         | 3         | 1.3         | 3          | 0.3         |
| <b>Grand Total*</b> |                | <b>97</b> | <b>40</b> | <b>210</b> | <b>96</b> | <b>570</b> | <b>608</b> | <b>3685</b> | <b>3708</b> | <b>1544</b> | <b>1482</b> | <b>622</b> | <b>644</b> | <b>307</b> | <b>30.6</b> | <b>71</b> | <b>29.6</b> | <b>136</b> | <b>12.8</b> |

Abbreviations: P, pathogenic; LP, likely pathogenic

†Rare variants of uncertain significance but predicted damaging based on in silico predictions (MetaSVM, REVEL, and CADD scores).

Disc, 1,004 discovery set cases; Rep., 240 total independent replication set cases.

\*Overall pathogenic variant prevalence appears a little higher here due to some people carrying more than one pathogenic gene variant and counted more than once here.

**eTable 11.** Predicted Pathogenic and Likely Pathogenic Variants in 240 Patients in the Replication Set

| Path. Score | No. Cases | Chr   | Position  | REF          | ALT           | Gene            | Gene Inher. | HGVS.c                                                                                                              | Effect                                            | Impact   | Classic High Impact | Pop Max Freq | Sequencing |
|-------------|-----------|-------|-----------|--------------|---------------|-----------------|-------------|---------------------------------------------------------------------------------------------------------------------|---------------------------------------------------|----------|---------------------|--------------|------------|
| P           | 1         | chr1  | 45798475  | T            |               | <i>MUTYH</i>    | AR          | c.536A>G;c.452A>G;c.485A>G;c.452A>G;c.455A>G;c.452A>G;c.527A>G;c.497A>G;c.494A>G;c.485A>G;c.494A>G;c.68A>G;c.485A>G | Missense variant                                  | MODERATE |                     | 0.30%        | Targeted   |
| P           | 1         | chr1  | 43803600  | T            | A             | <i>MPL</i>      | AD/AR       | c.79+2T>A;c.79+2T>A                                                                                                 | HIGH                                              |          | %                   | Targeted     |            |
| P           | 1         | chr1  | 43804396  | G            | C             | <i>MPL</i>      | AD/AR       | c.391+5G>C;c.391+5G>C                                                                                               | LOW                                               |          | %                   | Targeted     |            |
| LP          | 1         | chr1  | 93299353  | T            | G             | <i>RPL5</i>     | AD          | c.190T>G                                                                                                            | Stop lost & splice region variant                 | IGH      |                     | 0.00%        | Targeted   |
| P           | 1         | chr1  | 155205634 | T            | C             | <i>GBA</i>      | AR          | c.1226A>G;c.1226A>G;c.1079A>G;c.887A>G;c.965A>G                                                                     | Missense variant & splice region variant          | MODERATE |                     | 0.36%        | ES         |
| P           | 1         | chr1  | 43804305  | G            | C             | <i>MPL</i>      | AD/AR       | c.305G>C;c.305G>C                                                                                                   | Missense variant                                  | MODERATE |                     | 0.10%        | ES         |
| LP          | 1         | chr2  | 169853219 | C            | T             | <i>ABCB11</i>   | AR          | c.403G>A                                                                                                            | Missense variant                                  | MODERATE |                     | 0.01%        | Targeted   |
| P           | 1         | chr2  | 48026250  | AAAGAG       | A             | <i>MSH6</i>     | AD/AR       | c.1135_1139delAGAGA;c.745_749delAGAGA;c.229_233delAGAGA                                                             | Frameshift variant                                | IGH      |                     | 0.00%        | Targeted   |
| LP          | 1         | chr2  | 169783792 | CA           | C             | <i>ABCB11</i>   | AR          | c.3491delT                                                                                                          | Frameshift variant                                | IGH      |                     | 0.00%        | Targeted   |
| P           | 1         | chr2  | 209108190 | T            | C             | <i>IDH1</i>     | UNK         | c.659A>G                                                                                                            | Structural interaction variant; missense variant  | IGH      |                     | 0.08%        | Targeted   |
| P           | 1         | chr2  | 47637389  | CTG          | C             | <i>MSH2</i>     | AD/AR       | c.528_529delTG;c.330_331delTG;c.330_331delTG;c.528_529delTG;c.528_529delTG;c.528_529delTG                           | Frameshift variant structural interaction variant | IGH      |                     | 0.00%        | ES         |
| P           | 1         | chr2  | 48023116  | G            | T             | <i>MSH6</i>     | AD/AR       | c.541G>T;c.244G>T;c.244G>T;c.244G>T                                                                                 | Stop gained                                       | IGH      |                     | 0.00%        | ES         |
| LP          | 1         | chr2  | 47596772  | G            | GCGGCCCGGCCCT | <i>EPCAM</i>    | AD          | c.138_151dupGCCCTCGGCCCG                                                                                            | Frameshift variant                                | IGH      |                     | 0.00%        | ES         |
| LP          | 1         | chr3  | 70008546  | A            | G             | <i>MITF</i>     | AD          | c.1154A>G;c.1136A>G;c.980A>G;c.1133A>G;c.1088A>G;c.1061A>G;c.815A>G;c.833A>G;c.647A>G                               | Missense variant                                  | MODERATE |                     | 0.01%        | ES         |
| LP          | 1         | chr3  | 189587125 | A            | G             | <i>TP63</i>     | AD          | c.1142A>G;c.887A>G;c.1142A>G;c.1142A>G;c.1142A>G;c.1130A>G;c.860A>G;c.860A>G;c.860A>G;c.860A>G;c.605A>G;c.848A>G    | Missense variant                                  | MODERATE |                     | 0.00%        | ES         |
| LP          | 1         | chr3  | 189607139 | G            | A             | <i>TP63</i>     | AD          | c.1518G>A;c.1263G>A;c.1518G>A;c.1506G>A;c.1236G>A;c.1236G>A;c.981G>A;c.1224G>A                                      | Missense variant                                  | MODERATE |                     | 0.00%        | ES         |
| LP          | 1         | chr6  | 10411828  | ATCTGCGAAGAG | A             | <i>TFAP2A</i>   | UNK         | c.-10_1delCTCTTCGCAGA;c.-10_1delCTCTTCGCAGA                                                                         | Frameshift variant & start lost                   | IGH      |                     | 0.00%        | ES         |
| LP          | 1         | chr6  | 43550081  | G            | T             | <i>POLH</i>     | AR          | c.25G>T                                                                                                             | HIGH                                              |          | %                   | WES          |            |
| LP          | 1         | chr7  | 55270399  | C            | T             | <i>EGFR</i>     | AD          | c.3217C>T                                                                                                           | Stop gained                                       | IGH      |                     | 0.00%        | ES         |
| P           | 1         | chr8  | 30938648  | C            | T             | <i>WRN</i>      | AR          | c.1105C>T                                                                                                           | Stop gained                                       | IGH      |                     | 0.03%        | Targeted   |
| P           | 1         | chr8  | 31004567  | A            | G             | <i>WRN</i>      | AR          | c.3384-2A>G;n.2017-2A>G                                                                                             | HIGH                                              |          | %                   | Targeted     |            |
| P           | 1         | chr8  | 30946482  | G            | A             | <i>WRN</i>      | AR          | c.1652+1G>A;n.353+1G>A                                                                                              | HIGH                                              |          | %                   | Targeted     |            |
| P           | 1         | chr8  | 145738796 | G            | A             | <i>RECQL4</i>   | AR          | c.2269C>T                                                                                                           | Stop gained                                       | IGH      |                     | 0.04%        | ES         |
| P           | 1         | chr8  | 145741453 | CCT          | C             | <i>RECQL4</i>   | AR          | c.1048_1049delAG;c.568_569delAG                                                                                     | Frameshift variant                                | IGH      |                     | 0.02%        | ES         |
| LP          | 1         | chr9  | 101602374 | G            | T             | <i>GALNT12</i>  | AD          | c.1303G>T                                                                                                           | Stop gained                                       | IGH      |                     | 0.00%        | ES         |
| P           | 1         | chr11 | 108121531 | C            | T             | <i>ATM</i>      | AD/AR       | c.1339C>T;c.1339C>T;c.1339C>T                                                                                       | Stop gained                                       | IGH      |                     | 0.01%        | Targeted   |
| P           | 1         | chr11 | 64572613  | G            | A             | <i>MEN1</i>     | AD          | c.1258C>T;c.1138C>T;c.1243C>T                                                                                       | Structural interaction variant stop gained        | IGH      |                     | 0.00%        | ES         |
| P           | 1         | chr13 | 32914437  | GT           | G             | <i>BRCA2</i>    | AD/AR       | c.5946delT;c.5946delT                                                                                               | Frameshift variant                                | IGH      |                     | 0.04%        | Targeted   |
| LP          | 1         | chr13 | 103520471 | C            | T             | <i>ERCC5</i>    | AR          | c.2542C>T;c.241C>T                                                                                                  | Missense variant                                  | MODERATE |                     | 0.03%        | Targeted   |
| LP          | 1         | chr13 | 32944697  | A            | G             | <i>BRCA2</i>    | AD/AR       | c.8487+3A>G;c.8487+3A>G                                                                                             | LOW                                               |          | %                   | WES          |            |
| LP          | 1         | chr13 | 103519117 | C            | T             | <i>ERCC5</i>    | AR          | c.2455C>T;c.154C>T                                                                                                  | Missense variant                                  | MODERATE |                     | 0.00%        | ES         |
| LP          | 1         | chr14 | 94849388  | G            | A             | <i>SERPINA1</i> | AR          | c.187C>T                                                                                                            | Missense variant                                  | MODERATE |                     | 0.30%        | Targeted   |
| P           | 1         | chr14 | 81558873  | A            | G             | <i>TSHR</i>     | AD          | c.468-2A>G;c.468-2A>G;c.468-2A>G;c.468-2A>G;c.468-2A>G                                                              | HIGH                                              |          | %                   | Targeted     |            |
| P           | 3         | chr15 | 80460605  | G            | T             | <i>FAH</i>      | AR          | c.554-1G>T;c.554-1G>T;c.554-1G>T;c.344-1G>T;n.482-1G>T;n.100-1G>T                                                   | HIGH                                              |          | %                   | Targeted     |            |
| LP          | 1         | chr15 | 80472673  | G            | A             | <i>FAH</i>      | AR          | c.*84+1G>A                                                                                                          | Splice donor variant                              | IGH      |                     | 0.14%        | Targeted   |
| LP          | 1         | chr15 | 66781553  | C            | T             | <i>MAP2K1</i>   | AD          | c.961C>T;c.433C>T                                                                                                   | Missense variant & splice region variant          | MODERATE |                     | 0.02%        | ES         |
| P           | 1         | chr16 | 2134966   | A            | C             | <i>TSC2</i>     | AD          | c.4508A>C;c.4163A>C;c.4307A>C;c.4379A>C;c.4199A>C;c.4439A>C;c.4340A>C;c.689A>C                                      | Missense variant                                  | MODERATE |                     | 0.00%        | Targeted   |
| P           | 1         | chr16 | 89805118  | T            | C             | <i>FANCA</i>    | AR          | c.4261-2A>G;c.4265-2A>G;c.481-2A>G;n.532-2A>G;c.635-2A>G                                                            | HIGH                                              |          | %                   | Targeted     |            |
| LP          | 1         | chr16 | 89882683  | G            | C             | <i>FANCA</i>    | AR          | c.341C>G                                                                                                            | Stop gained                                       | IGH      |                     | 0.08%        | Targeted   |
| LP          | 1         | chr16 | 89865516  | T            | A             | <i>FANCA</i>    | AR          | c.123A>T;c.951A>T                                                                                                   | Stop lost                                         | IGH      |                     | 0.29%        | Targeted   |

|    |   |       |           |       |        |              |       |                                                                                                                                                                                                                                                      |                                                  |          |   |       |          |
|----|---|-------|-----------|-------|--------|--------------|-------|------------------------------------------------------------------------------------------------------------------------------------------------------------------------------------------------------------------------------------------------------|--------------------------------------------------|----------|---|-------|----------|
| LP | 1 | chr16 | 89805692  | AG    | A      | <i>FANCA</i> | AR    | c.4015delC;c.4015delC;c.166delC;c.343delC;c.214delC                                                                                                                                                                                                  | Frameshift variant                               | IGH      |   | 0.01% | ES       |
| LP | 1 | chr16 | 14022000  | A     | C      | <i>ERCC4</i> | AR    | c.225A>C                                                                                                                                                                                                                                             | Stop lost                                        | IGH      |   | 0.01% | ES       |
| LP | 1 | chr16 | 89829189  | T     | C      | <i>FANCA</i> | AR    | c.153A>G                                                                                                                                                                                                                                             | Stop lost                                        | IGH      |   | 0.00% | ES       |
| LP | 1 | chr17 | 7574017   | C     | A      | <i>TP53</i>  | AD    | c.1010G>T;c.1010G>T                                                                                                                                                                                                                                  | Missense variant                                 | MODERATE |   | 0.00% | Targeted |
| LP | 2 | chr17 | 7577568   | C     | T      | <i>TP53</i>  | AD    | c.713G>A;c.713G>A;c.713G>A;c.713G>A;c.713G>A;c.713G>A;c.713G>A;c.713G>A;c.713G>A;c.713G>A                                                                                                                                                            | Structural interaction variant                   | IGH      |   | 0.00% | ES       |
| P  | 1 | chr17 | 41219665  | ATTAG | A      | <i>BRCA1</i> | AD    | c.5093_5096delCTAA;c.5030_5033delCTAA;c.1481_1484delCTAA;c.4142_4145delCTAA;c.1604_1607delCTAA;c.1718_1721delCTAA;c.503_506delCTAA;c.4889_4892delCTAA;c.1718_1721delCTAA;c.1343_1346delCTAA;c.1718_1721delCTAA;c.1580_1583delCTAA;c.5030_5033delCTAA | Frameshift variant                               | IGH      |   | 0.00% | Targeted |
| P  | 1 | chr17 | 7577539   | G     | A      | <i>TP53*</i> | AD    | c.742C>T;c.742C>T;c.742C>T;c.742C>T                                                                                                                                                                                                                  | Protein protein contact missense variant         | IGH      |   | 0.00% | Targeted |
| P  | 1 | chr17 | 7574003   | G     | A      | <i>TP53*</i> | AD    | c.1024C>T;c.1024C>T;c.1024C>T;c.1024C>T                                                                                                                                                                                                              | Stop gained                                      | IGH      |   | 0.00% | Targeted |
| P  | 1 | chr17 | 7577022   | G     | A      | <i>TP53*</i> | AD    | c.916C>T;c.916C>T;c.916C>T;c.916C>T;c.916C>T;c.520C>T                                                                                                                                                                                                | Stop gained                                      | IGH      |   | 0.00% | Targeted |
| P  | 1 | chr17 | 7577094   | G     | A      | <i>TP53*</i> | AD    | c.844C>T                                                                                                                                                                                                                                             | HIGH                                             |          | % |       | Targeted |
| P  | 1 | chr17 | 7577120   | C     | T      | <i>TP53*</i> | AD    | c.818G>A                                                                                                                                                                                                                                             | HIGH                                             |          | % |       | Targeted |
| P  | 1 | chr17 | 7577548   | C     | T      | <i>TP53*</i> | AD    | c.733G>A;c.733G>A                                                                                                                                                                                                                                    | Structural interaction variant; missense variant | IGH      |   | 0.01% | Targeted |
| P  | 1 | chr17 | 7578406   | C     | T      | <i>TP53*</i> | AD    | c.524G>A                                                                                                                                                                                                                                             | HIGH                                             |          | % |       | Targeted |
| LP | 1 | chr17 | 7578400   | G     | C      | <i>TP53</i>  | AD    | c.530C>G;c.530C>G;c.530C>G;c.530C>G;c.530C>G;c.530C>G;c.134C>G;c.251C>G                                                                                                                                                                              | Missense variant                                 | MODERATE |   | 0.01% | Targeted |
| LP | 1 | chr17 | 7579368   | A     | G      | <i>TP53†</i> | AD    | c.319T>C                                                                                                                                                                                                                                             | HIGH                                             |          | % |       | Targeted |
| P  | 1 | chr17 | 47684623  | C     | G      | <i>SPOP</i>  | UNK   | c.826G>C                                                                                                                                                                                                                                             | Structural interaction variant; missense variant | IGH      |   | 0.00% | Targeted |
| LP | 1 | chr17 | 7577102   | C     | T      | <i>TP53</i>  | AD    | c.836G>A                                                                                                                                                                                                                                             | HIGH                                             |          | % |       | WES      |
| P  | 1 | chr17 | 41061435  | G     | C      | <i>G6PC</i>  | AR    | c.562G>C;c.485G>C                                                                                                                                                                                                                                    | Missense variant & splice region variant         | MODERATE |   | 0.01% | ES       |
| LP | 1 | chr17 | 17124819  | C     | T      | <i>FLCN</i>  | AD    | c.903G>A                                                                                                                                                                                                                                             | Stop gained                                      | IGH      |   | 0.08% | ES       |
| LP | 2 | chr17 | 29706042  | G     | A      | <i>NF1</i>   | AD    | HIGH                                                                                                                                                                                                                                                 | Splice donor variant & intron variant            | IGH      |   | 0.30% | ES       |
| P  | 1 | chr19 | 45855804  | CT    | C      | <i>ERCC2</i> | AR    | c.2005delA;c.1771delA;c.1933delA                                                                                                                                                                                                                     | Frameshift variant                               | IGH      |   | 0.00% | Targeted |
| LP | 1 | chr19 | 45855795  | G     | A      | <i>ERCC2</i> | AR    | c.2015C>T;c.1781C>T;c.1943C>T                                                                                                                                                                                                                        | Missense variant                                 | MODERATE |   | 0.02% | Targeted |
| LP | 1 | chr19 | 45860760  | C     | T      | <i>ERCC2</i> | AR    | c.1349G>A;c.1115G>A;c.1277G>A;c.470G>A                                                                                                                                                                                                               | Missense variant                                 | MODERATE |   | 0.04% | Targeted |
| LP | 1 | chr20 | 62293801  | C     | T      | <i>RTEL1</i> | AD/AR | c.448C>T                                                                                                                                                                                                                                             | Stop gained                                      | IGH      |   | 0.01% | Targeted |
| P  | 1 | chr21 | 36252995  | C     | G      | <i>RUNX1</i> | AD    | c.286G>C;c.286G>C                                                                                                                                                                                                                                    | Structural interaction variant; missense variant | IGH      |   | 0.01% | Targeted |
| LP | 1 | chrX  | 153991099 | C     | G      | <i>DKC1</i>  | XLR   | c.-142C>G                                                                                                                                                                                                                                            | 5 prime UTR premature start codon gain variant   | LOW      |   | 0.13% | ES       |
| LP | 1 | chrX  | 48547322  | C     | CACGAT | <i>WAS</i>   | XLR   | c.1205_1206insACGAT                                                                                                                                                                                                                                  | Frameshift variant                               | IGH      |   | 0.00% | ES       |

P = pathogenic, LP = likely pathogenic, VUS = variant of uncertain significance, LB = likely benign.

AD, autosomal dominant; AR, autosomal recessive; XLR, X-linked recessive; UNK, unknown inheritance; DM, disease-causing mutation; WES, whole exome sequencing.

*TP53\** variant at this position present in the IARC germline mutation TP53 database (R20) in Li-Fraumeni syndrome, Li-Fraumeni-like syndrome, or *TP53* Chompret classified families/individuals.

*TP53†* variant present in an osteosarcoma case in the discovery and replication set and also in an individual in the IARC germline mutation TP53 database (R20) with osteosarcoma.

**eTable 12.** Top Statistically Significant Candidate Genes With a Higher Burden of Variants

European patients (n = 732) compared with European individuals in the control group (n = 994) for the specified burden test.

| Genes evaluated, Burden test                 | Top genes <sup>†</sup> | $P_{\text{burden}}$ | N, EUR cases | % of cases | N, EUR controls | % of controls |
|----------------------------------------------|------------------------|---------------------|--------------|------------|-----------------|---------------|
| <i>Somatically altered genes</i>             |                        |                     |              |            |                 |               |
| Damaging variants                            |                        |                     |              |            |                 |               |
|                                              | <i>SUZ12</i>           | 0.002               | 9            | 1.2%       | 1               | 0.1%          |
|                                              | <i>MLLT4</i>           | 0.004               | 10           | 1.4%       | 2               | 0.2%          |
|                                              | <i>ALDH2</i>           | 0.020               | 4            | 0.5%       | 0               | 0.0%          |
|                                              | <i>THSD4</i>           | 0.020               | 6            | 0.8%       | 1               | 0.1%          |
| All rare variants                            |                        |                     |              |            |                 |               |
|                                              | <i>NACA</i>            | 0.0006              | 99           | 13.5%      | 73              | 7.3%          |
|                                              | <i>MNX1</i>            | 0.0008              | 33           | 4.5%       | 10              | 1.0%          |
|                                              | <i>HOXA13</i>          | 0.0028              | 24           | 3.3%       | 9               | 0.9%          |
| <i>Candidate genes from previous studies</i> |                        |                     |              |            |                 |               |
| Damaging variants                            |                        |                     |              |            |                 |               |
|                                              | <i>PRKCG</i>           | 0.043               | 3            | 0.4%       | 0               | 0.0%          |
| All rare variants                            |                        |                     |              |            |                 |               |
|                                              | <i>ZNF208</i>          | 0.002               | 100          | 13.7%      | 73              | 7.3%          |
|                                              | <i>NFE2L2</i>          | 0.007               | 27           | 3.7%       | 16              | 1.6%          |
|                                              | <i>CAMK2D</i>          | 0.028               | 8            | 1.1%       | 2               | 0.2%          |
|                                              | <i>ATRX</i>            | 0.041               | 28           | 3.8%       | 18              | 1.8%          |
|                                              | <i>CYP2C8</i>          | 0.045               | 15           | 2.0%       | 9               | 0.9%          |

N, number of individuals with the specified rare variants.

‡ only the top significant genes are shown.

**eFigure 1.** Mean Whole-Exome Sequencing Coverage per Sample

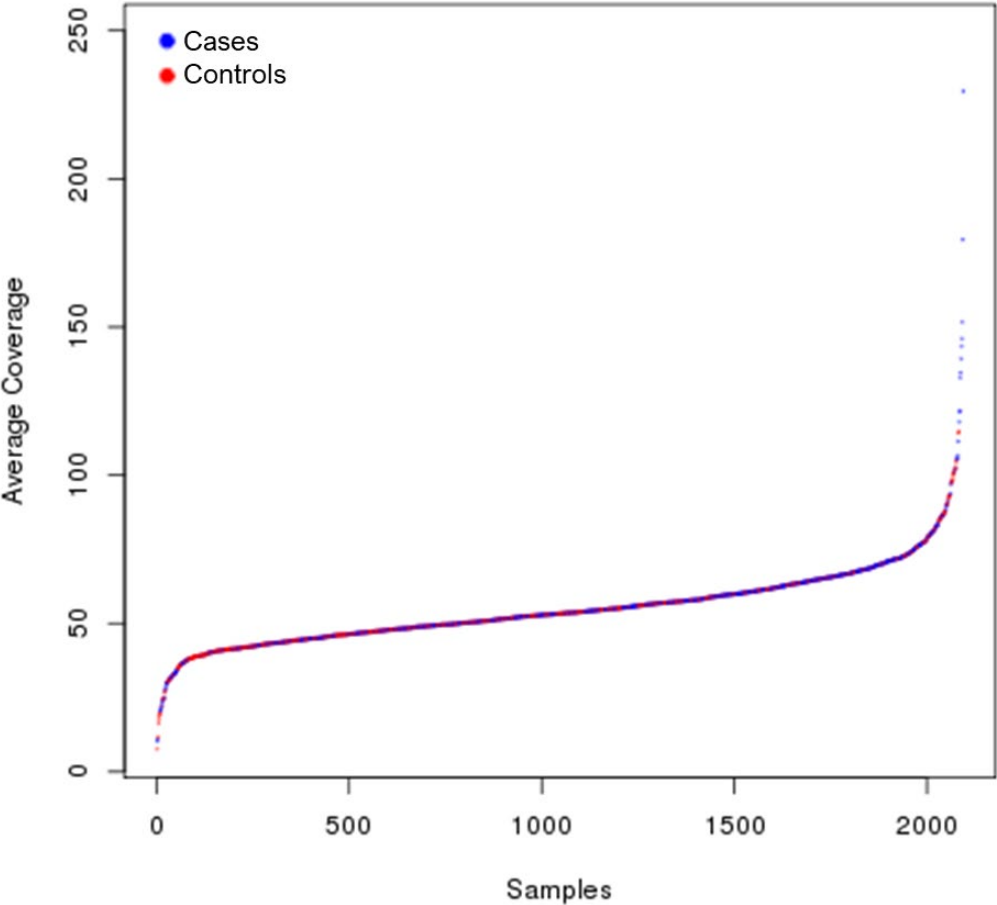

Coverage across the 238 cancer-susceptibility genes for the 1004 patients in the primary discovery set and 1062 individuals the control group. Depth of coverage was estimated after excluding the duplicate reads generated during sequencing. The mean coverage for all participant samples was 57.13 (standard deviation 16.16) and 53.18 for all control group samples (standard deviation 12.94).

**eFigure 2.** Frequency of Rare Pathogenic/Likely Pathogenic Variants in the *TP53* Gene and the Other Cancer-Susceptibility Genes

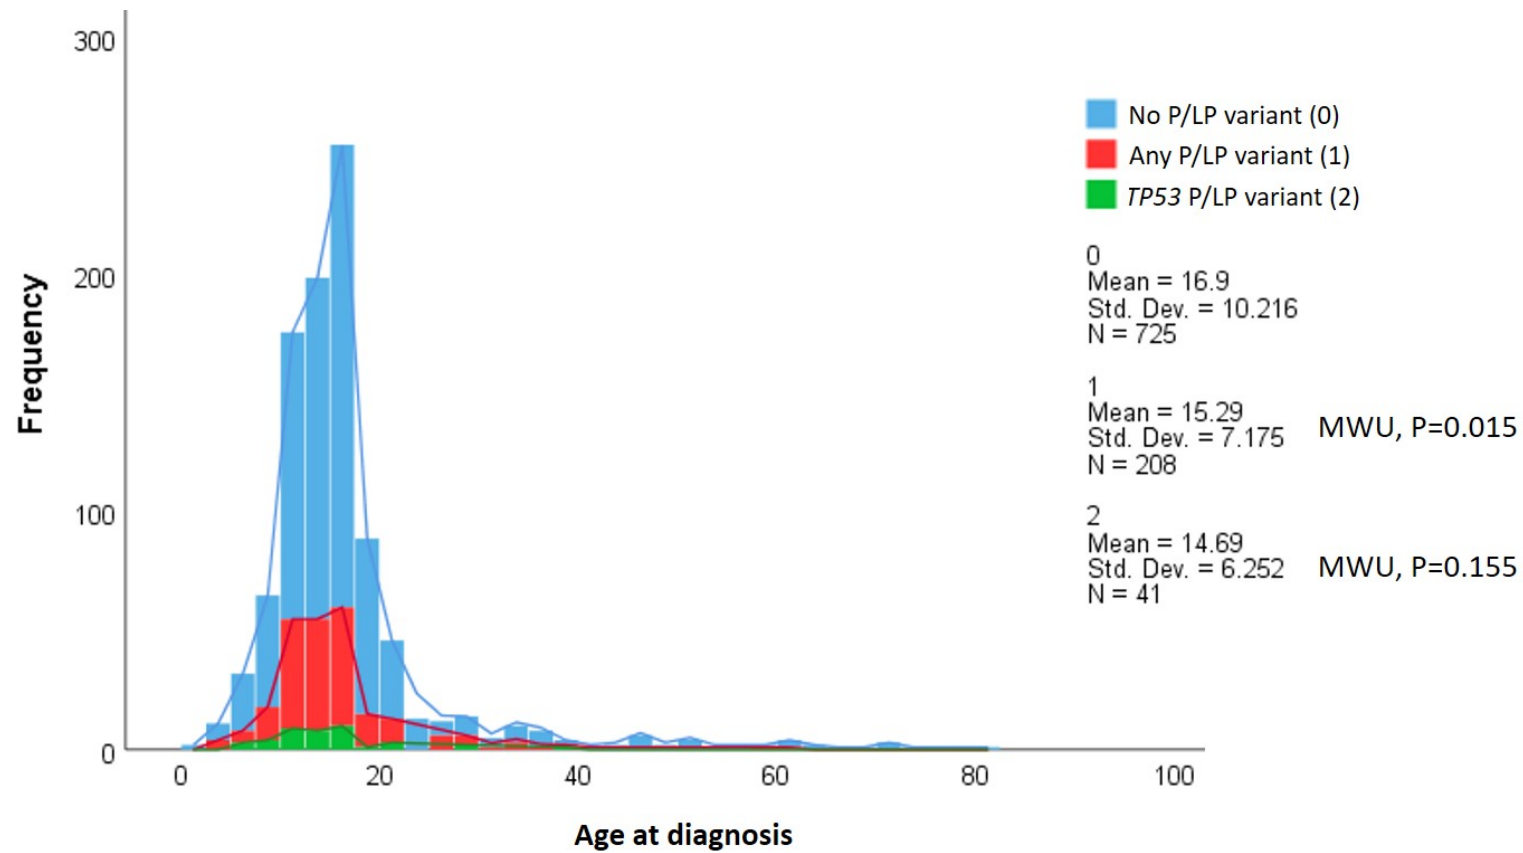

Frequency compared with individuals without a pathogenic/likely pathogenic variant by age at diagnosis. Mann-Whitney U (MWU) test *P* value for the distribution of age at osteosarcoma diagnosis for individuals with and without pathogenic/likely pathogenic variants for all cancer-susceptibility genes (1) and for *TP53* (2). Not all patients had age at diagnosis data. The all pathogenic/likely pathogenic variant (1) category in red excludes the individuals with *TP53* P/LP variants (2) shown in green.



**eFigure 3.** Pathway Enrichment Illustrated With a Network Analysis and Protein-Protein Interactions for 101 Cancer-Susceptibility Genes With 1 or More Pathogenic/Likely Pathogenic Variant Identified in Discovery Set of 1004 Patients With Osteosarcoma

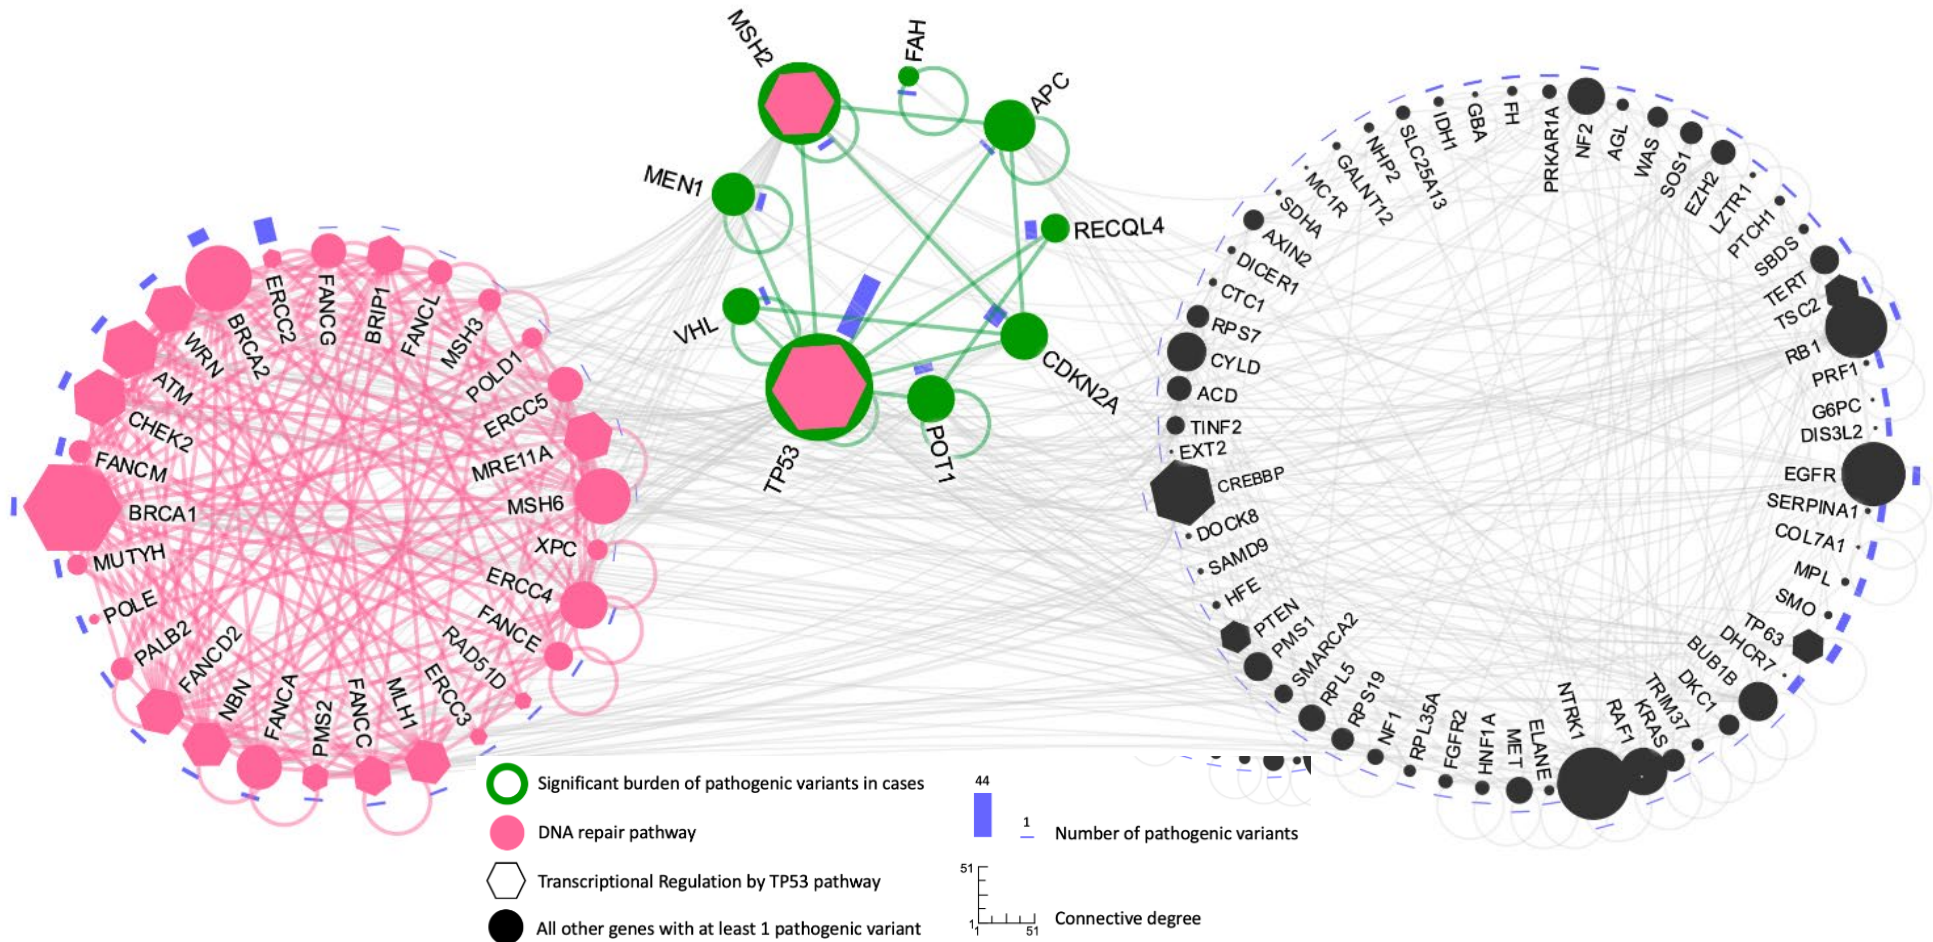

Node size represents the number of protein-protein interactions within the network, with a maximum of 51 and minimum of 1. Pathway enrichment analyses were performed using algorithms from the web tools, KOBAS 3.0 and PathDIP. Both algorithms used a hypergeometric approach to test pathways that are overrepresented given a gene set.

**eFigure 4.** Lollipop Plots Illustrating Location of Variants Within the Specified Genes That Contain a Significantly Increased Burden (Number) of Rare Pathogenic/Likely Pathogenic Variants in Patients Compared With the Control Group by Protein/Functional Domain

**A. TP53**

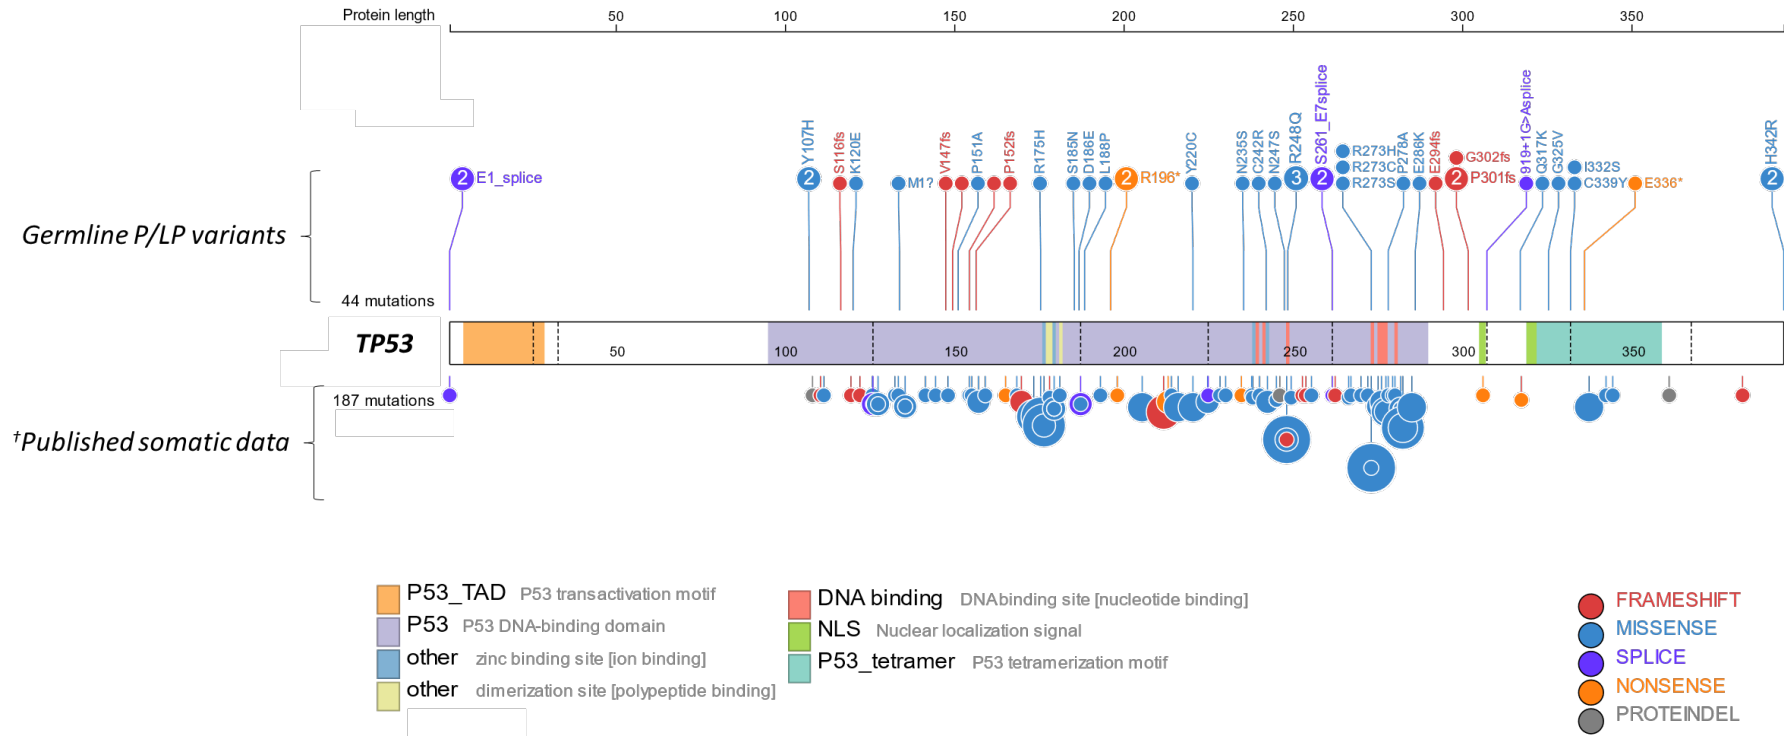

Pathogenic/likely pathogenic variants observed in the 1004 patients with osteosarcoma are shown above each plot. † Published somatic variants from the Therapeutically Applicable Research To Generate Effective Treatments (TARGET) osteosarcoma study and the Pediatric Cancer Genome Project (PCGP) osteosarcoma study and from COSMIC bone cancers visualized in the ProteinPaint genome browser. Published somatic variants from all the pediatric cancer data in TARGET and PCGP and from COSMIC bone cancers were retrieved with the ProteinPaint genome browser. The number of patients with a specific variant are shown within each circle if more than 1.

## B. CDKN2A

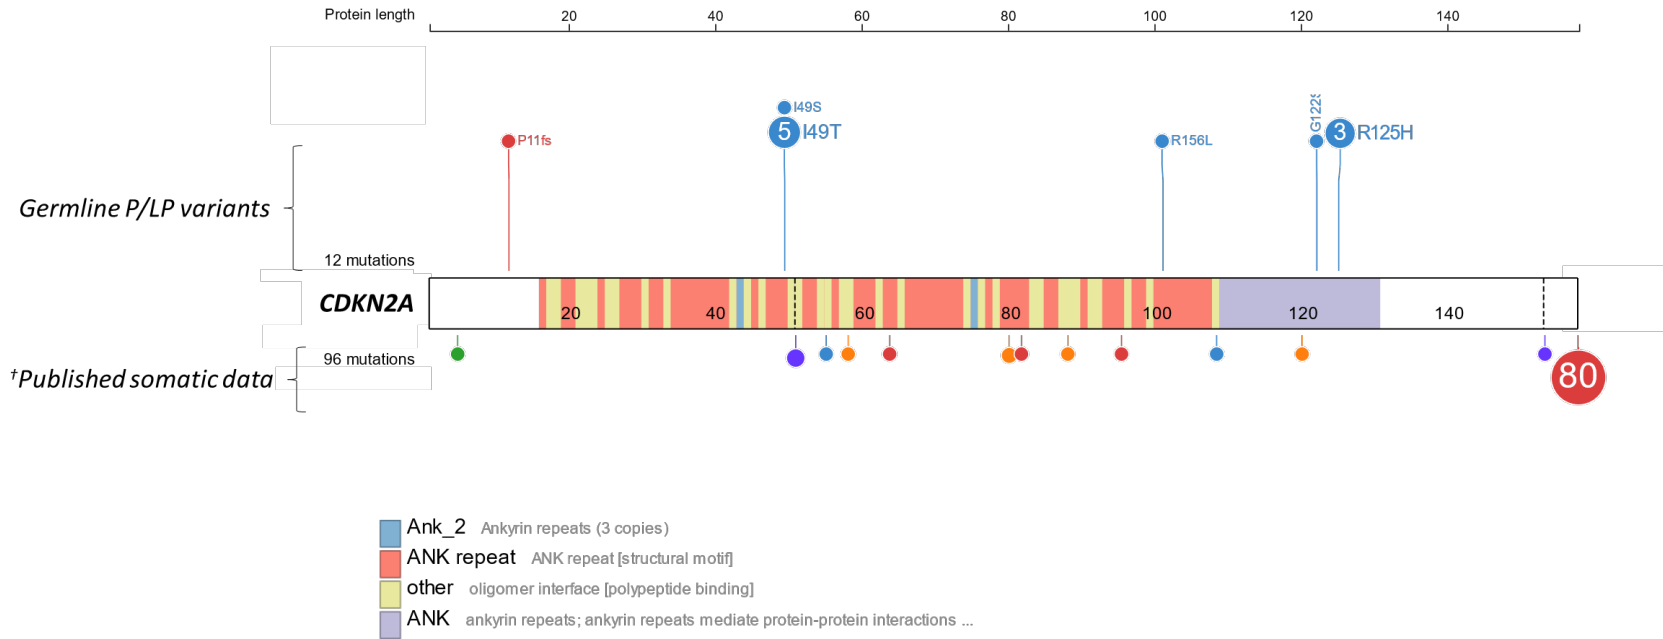

Pathogenic/likely pathogenic variants observed in the 1004 patients with osteosarcoma are shown above each plot. † Published somatic variants from the Therapeutically Applicable Research To Generate Effective Treatments (TARGET) osteosarcoma study and the Pediatric Cancer Genome Project (PCGP) osteosarcoma study and from COSMIC bone cancers visualized in the ProteinPaint genome browser. Published somatic variants from all the pediatric cancer data in TARGET and PCGP and from COSMIC bone cancers were retrieved with the ProteinPaint genome browser. The number of patients with a specific variant are shown within each circle if more than 1.

### C. RECQL4

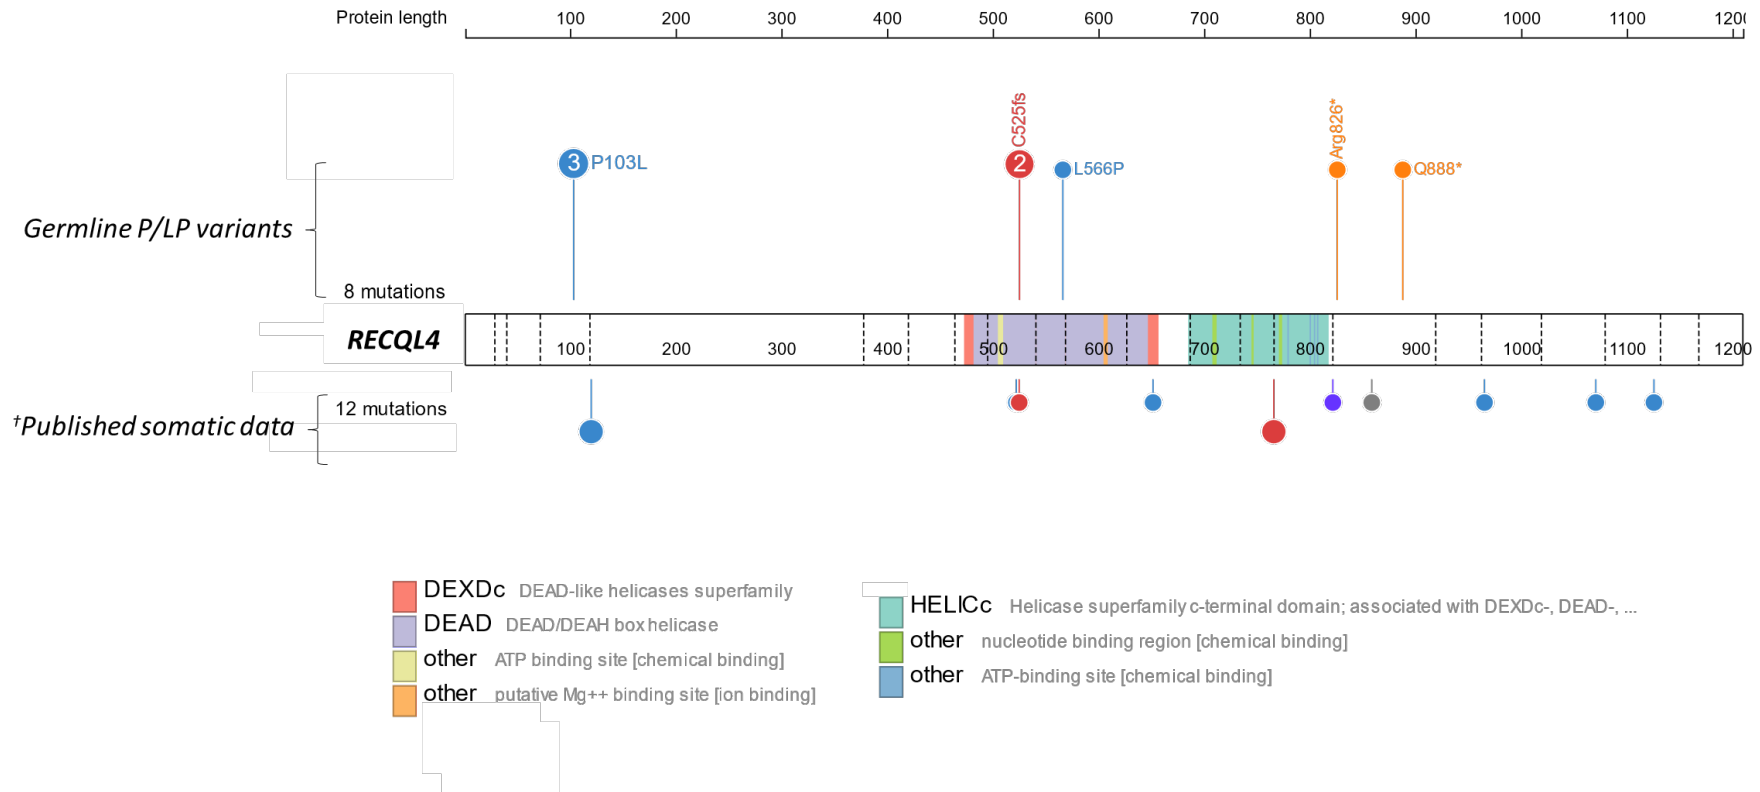

Pathogenic/likely pathogenic variants observed in the 1004 patients with osteosarcoma are shown above each plot. † Published somatic variants from the Therapeutically Applicable Research To Generate Effective Treatments (TARGET) osteosarcoma study and the Pediatric Cancer Genome Project (PCGP) osteosarcoma study and from COSMIC bone cancers visualized in the ProteinPaint genome browser. Published somatic variants from all the pediatric cancer data in TARGET and PCGP and from COSMIC bone cancers were retrieved with the ProteinPaint genome browser. The number of patients with a specific variant are shown within each circle if more than 1.

## eReferences

1. Savage SA, Mirabello L, Wang Z, et al. Genome-wide association study identifies two susceptibility loci for osteosarcoma. *Nat Genet.* 2013;45(7):799-803.
2. Mirabello L, Koster R, Moriarity BS, et al. A Genome-Wide Scan Identifies Variants in NFIB Associated with Metastasis in Patients with Osteosarcoma. *Cancer Discov.* 2015;5(9):920-931.
3. Morton LM, Sampson JN, Armstrong GT, et al. Genome-Wide Association Study to Identify Susceptibility Loci That Modify Radiation-Related Risk for Breast Cancer After Childhood Cancer. *JNCI Journal of the National Cancer Institute.* 2017;109(11):dix058.
4. Mirabello L, Yu K, Berndt SI, et al. A comprehensive candidate gene approach identifies genetic variation associated with osteosarcoma. *BMC Cancer.* 2011;11:209-209.
5. Dean M, Bendfeldt G, Lou H, et al. Increased incidence and disparity of diagnosis of retinoblastoma patients in Guatemala. *Cancer letters.* 2014;351(1):59-63.
6. Musselman JR, Bergemann TL, Ross JA, et al. Case-parent analysis of variation in pubertal hormone genes and pediatric osteosarcoma: a Children's Oncology Group (COG) study. *Int J Mol Epidemiol Genet.* 2012;3(4):286-293.
7. Mirabello L, Yeager M, Mai PL, et al. Germline TP53 Variants and Susceptibility to Osteosarcoma. *Journal of the National Cancer Institute.* 2015;107(7).
8. Prorok PC, Andriole GL, Bresalier RS, et al. Design of the prostate, lung, colorectal and ovarian (PLCO) cancer screening trial. *Controlled Clinical Trials.* 2000;21(6, Supplement 1):273S-309S.
9. Calle EE, Rodriguez C, Jacobs EJ, et al. The American Cancer Society Cancer Prevention Study II Nutrition Cohort. 2002;94(2):500-511.
10. Landi MT, Consonni D, Rotunno M, et al. Environment And Genetics in Lung cancer Etiology (EAGLE) study: an integrative population-based case-control study of lung cancer. *BMC Public Health.* 2008;8:203-203.
11. Mirabello L, Macari ER, Jessop L, et al. Whole-exome sequencing and functional studies identify RPS29 as a novel gene mutated in multicase Diamond-Blackfan anemia families. *Blood.* 2014;124(1):24-32.
12. Mirabello L, Khincha PP, Ellis SR, et al. Novel and known ribosomal causes of Diamond-Blackfan anaemia identified through comprehensive genomic characterisation. *Journal of Medical Genetics.* 2017;54(6):417-425.
13. Kim J, Luo W, Wang M, et al. Prevalence of pathogenic/likely pathogenic variants in the 24 cancer genes of the ACMG Secondary Findings v2.0 list in a large cancer cohort and ethnicity-matched controls. *Genome Medicine.* 2018;10(1):99.
14. DePristo MA, Banks E, Poplin R, et al. A framework for variation discovery and genotyping using next-generation DNA sequencing data. *Nature genetics.* 2011;43(5):491-498.
15. Shi J, Yang XR, Ballew B, et al. Rare missense variants in POT1 predispose to familial cutaneous malignant melanoma. *Nature genetics.* 2014;46(5):482-486.
16. Röder B, Frühwirth K, Vogl C, Wagner M, Rossmanith P. Impact of long-term storage on stability of standard DNA for nucleic acid-based methods. *Journal of clinical microbiology.* 2010;48(11):4260-4262.

17. Exome Variant Server, NHLBI GO Exome Sequencing Project (ESP). Release Version: v.0.0.30. Nov. 3, 2014.
18. Exome Aggregation Consortium (ExAC). January 13, 2015.
19. DePristo MA, Banks E, Poplin R, et al. A framework for variation discovery and genotyping using next-generation DNA sequencing data. *Nature Genetics*. 2011;43:491.
20. Li H. Aligning sequence reads, clone sequences and assembly contigs with BWA-MEM. March 2013.
21. Rahman N. Realising the Promise of Cancer Predisposition Genes. *Nature*. 2014;505(7483):302-308.
22. Zhang J, Walsh MF, Wu G, et al. Germline Mutations in Predisposition Genes in Pediatric Cancer. *New England Journal of Medicine*. 2015;373(24):2336-2346.
23. Forbes SA, Beare D, Boutselakis H, et al. COSMIC: somatic cancer genetics at high-resolution. *Nucleic Acids Research*. 2017;45(Database issue):D777-D783.
24. Gröbner SN, Worst BC, Weischenfeldt J, et al. The landscape of genomic alterations across childhood cancers. *Nature*. 2018;555:321.
25. Richards S, Aziz N, Bale S, et al. Standards and guidelines for the interpretation of sequence variants: a joint consensus recommendation of the American College of Medical Genetics and Genomics and the Association for Molecular Pathology. *Genet Med*. 2015;17(5):405-423.
26. Landrum MJ, Lee JM, Benson M, et al. ClinVar: improving access to variant interpretations and supporting evidence. *Nucleic Acids Research*. 2018;46(Database issue):D1062-D1067.
27. Li Q, Wang K. InterVar: Clinical Interpretation of Genetic Variants by the 2015 ACMG-AMP Guidelines. *The American Journal of Human Genetics*. 2017;100(2):267-280.
28. Stenson PD, Ball EV, Mort M, et al. Human Gene Mutation Database (HGMD®): 2003 update. *Human Mutation*. 2003;21(6):577-581.
29. Rahman N. Realizing the promise of cancer predisposition genes. *Nature*. 2014;505(7483):302-308.
30. Kim S, Jhong J-H, Lee J, Koo J-Y. Meta-analytic support vector machine for integrating multiple omics data. *BioData Mining*. 2017;10:2.
31. Ioannidis NM, Rothstein JH, Pejaver V, et al. REVEL: An Ensemble Method for Predicting the Pathogenicity of Rare Missense Variants. *The American Journal of Human Genetics*. 2016;99(4):877-885.
32. Adzhubei IA, Schmidt S, Peshkin L, et al. A method and server for predicting damaging missense mutations. *Nature Methods*. 2010;7:248.
33. Robinson JT, Thorvaldsdóttir H, Wenger AM, Zehir A, Mesirov JP. Variant Review with the Integrative Genomics Viewer. *Cancer Research*. 2017;77(21):e31-e34.
34. Ionita-Laza I, Lee S, Makarov V, Buxbaum Joseph D, Lin X. Sequence Kernel Association Tests for the Combined Effect of Rare and Common Variants. *The American Journal of Human Genetics*. 2013;92(6):841-853.
35. Zhu B, Mirabello L, Chatterjee N. A subregion-based burden test for simultaneous identification of susceptibility loci and subregions within. *Genet Epidemiol*. 2018;42(7):673-683.
36. Zhou X, Edmonson MN, Wilkinson MR, et al. Exploring genomic alteration in pediatric cancer using ProteinPaint. *Nature Genetics*. 2015;48:4.

37. Xie C, Mao X, Huang J, et al. KOBAS 2.0: a web server for annotation and identification of enriched pathways and diseases. *Nucleic acids research*. 2011;39(Web Server issue):W316-W322.
38. Rahmati S, Abovsky M, Pastrello C, Jurisica I. pathDIP: an annotated resource for known and predicted human gene-pathway associations and pathway enrichment analysis. *Nucleic acids research*. 2017;45(D1):D419-D426.
39. Kotlyar M, Pastrello C, Malik Z, Jurisica I. IID 2018 update: context-specific physical protein-protein interactions in human, model organisms and domesticated species. *Nucleic acids research*. 2019;47(D1):D581-D589.
40. Brown KR, Otasek D, Ali M, et al. NAViGaTOR: Network Analysis, Visualization and Graphing Toronto. *Bioinformatics (Oxford, England)*. 2009;25(24):3327-3329.
